# Supplementary material
Source: publisher figshare collection journal article supplement (https://acs.figshare.com/ndownloader/files/3745117)
Supplement: Supplementary file 1 [file 3745117]

data_shelxl
_audit_creation_date              2015-09-03
_audit_creation_method
;
Olex2 1.2
(compiled 2015.01.26 svn.r3150 for OlexSys, GUI svn.r4998)
;
_publ_contact_author_address      ?
_publ_contact_author_email        ?
_publ_contact_author_name         ''
_publ_contact_author_phone        ?
_publ_section_references
;
Dolomanov, O.V., Bourhis, L.J., Gildea, R.J, Howard, J.A.K. & Puschmann, H.
 (2009), J. Appl. Cryst. 42, 339-341.

Sheldrick, G.M. (2008). Acta Cryst. A64, 112-122.
;
_chemical_name_common             ?
_chemical_name_systematic         ?
_chemical_formula_moiety          'C18 H18 Br N3 O2'
_chemical_formula_sum             'C18 H18 Br N3 O2'
_chemical_formula_weight          388.26
_chemical_melting_point           ?
loop_
  _atom_type_symbol
  _atom_type_description
  _atom_type_scat_dispersion_real
  _atom_type_scat_dispersion_imag
  _atom_type_scat_source
 'C' 'C' 0.0181 0.0091 'International Tables Vol C Tables 4.2.6.8 and 6.1.1.4'
 'H' 'H' 0.0000 0.0000 'International Tables Vol C Tables 4.2.6.8 and 6.1.1.4'
 'N' 'N' 0.0311 0.0180 'International Tables Vol C Tables 4.2.6.8 and 6.1.1.4'
 'O' 'O' 0.0492 0.0322 'International Tables Vol C Tables 4.2.6.8 and 6.1.1.4'
 'Br' 'Br' -0.6763 1.2805
 'International Tables Vol C Tables 4.2.6.8 and 6.1.1.4'

_shelx_space_group_comment
;
The symmetry employed for this shelxl refinement is uniquely defined
by the following loop, which should always be used as a source of
symmetry information in preference to the above space-group names.
They are only intended as comments.
;
_space_group_crystal_system       'triclinic'
_space_group_IT_number            2
_space_group_name_H-M_alt         'P -1'
_space_group_name_Hall            '-P 1'
loop_
  _space_group_symop_operation_xyz
 'x, y, z'
 '-x, -y, -z'

_cell_length_a                    5.9914(5)
_cell_length_b                    11.8226(11)
_cell_length_c                    12.4394(11)
_cell_angle_alpha                 91.332(6)
_cell_angle_beta                  90.360(6)
_cell_angle_gamma                 97.099(7)
_cell_volume                      874.10(13)
_cell_formula_units_Z             2
_cell_measurement_reflns_used     2065
_cell_measurement_temperature     293
_cell_measurement_theta_max       68.50
_cell_measurement_theta_min       3.60
_shelx_estimated_absorpt_T_max    0.556
_shelx_estimated_absorpt_T_min    0.556
_exptl_absorpt_coefficient_mu     3.331
_exptl_absorpt_correction_T_max   0.511
_exptl_absorpt_correction_T_min   0.371
_exptl_absorpt_correction_type    Multi-scan
_exptl_absorpt_process_details    'FS_ABSCOR (Rigaku, 2009)'
_exptl_absorpt_special_details    ?
_exptl_crystal_colour             ?
_exptl_crystal_density_diffrn     1.475
_exptl_crystal_density_meas       ?
_exptl_crystal_density_method     ?
_exptl_crystal_description        block
_exptl_crystal_F_000              396
_exptl_crystal_size_max           0.21
_exptl_crystal_size_mid           0.17
_exptl_crystal_size_min           0.11
_exptl_transmission_factor_max    ?
_exptl_transmission_factor_min    ?
_diffrn_reflns_av_R_equivalents   0.0516
_diffrn_reflns_av_unetI/netI      0.0703
_diffrn_reflns_Laue_measured_fraction_full 0.961
_diffrn_reflns_Laue_measured_fraction_max 0.961
_diffrn_reflns_limit_h_max        7
_diffrn_reflns_limit_h_min        -7
_diffrn_reflns_limit_k_max        13
_diffrn_reflns_limit_k_min        -13
_diffrn_reflns_limit_l_max        14
_diffrn_reflns_limit_l_min        -10
_diffrn_reflns_number             8056
_diffrn_reflns_point_group_measured_fraction_full 0.961
_diffrn_reflns_point_group_measured_fraction_max 0.961
_diffrn_reflns_theta_full         66.584
_diffrn_reflns_theta_max          66.584
_diffrn_reflns_theta_min          3.554
_diffrn_ambient_temperature       293.15
_diffrn_detector                  RX
_diffrn_detector_area_resol_mean  10.0000
_diffrn_measured_fraction_theta_full 0.961
_diffrn_measured_fraction_theta_max 0.961
_diffrn_measurement_device
;
Crystal Goniometer
;
_diffrn_measurement_device_type   'Rigaku RAXIS conversion'
_diffrn_measurement_method        'profile data from \w-scans'
_diffrn_radiation_monochromator   Confocal
_diffrn_radiation_type            CuK\a
_diffrn_radiation_wavelength      1.54187
_diffrn_source                    'Rotating Anode'
_diffrn_source_current            30.0
_diffrn_source_power              1.2
_diffrn_source_voltage            40.0
_reflns_Friedel_coverage          0.000
_reflns_Friedel_fraction_full     .
_reflns_Friedel_fraction_max      .
_reflns_number_gt                 1653
_reflns_number_total              2961
_reflns_special_details
;
 Reflections were merged by SHELXL according to the crystal
 class for the calculation of statistics and refinement.
 
 _reflns_Friedel_fraction is defined as the number of unique
 Friedel pairs measured divided by the number that would be
 possible theoretically, ignoring centric projections and
 systematic absences.
;
_reflns_threshold_expression      'I > 2\s(I)'
_computing_cell_refinement        ?
_computing_data_collection        ?
_computing_data_reduction         ?
_computing_molecular_graphics     'Olex2 (Dolomanov et al., 2009)'
_computing_publication_material   'Olex2 (Dolomanov et al., 2009)'
_computing_structure_refinement   'ShelXL (Sheldrick, 2008)'
_computing_structure_solution     'ShelXS-1997 (Sheldrick, 2008)'
_refine_diff_density_max          0.329
_refine_diff_density_min          -0.308
_refine_diff_density_rms          0.057
_refine_ls_extinction_coef        .
_refine_ls_extinction_method      none
_refine_ls_goodness_of_fit_ref    0.996
_refine_ls_hydrogen_treatment     mixed
_refine_ls_matrix_type            full
_refine_ls_number_parameters      223
_refine_ls_number_reflns          2961
_refine_ls_number_restraints      2
_refine_ls_R_factor_all           0.0882
_refine_ls_R_factor_gt            0.0497
_refine_ls_restrained_S_all       0.996
_refine_ls_shift/su_max           0.002
_refine_ls_shift/su_mean          0.000
_refine_ls_structure_factor_coef  Fsqd
_refine_ls_weighting_details
'w=1/[\s^2^(Fo^2^)+(0.0693P)^2^] where P=(Fo^2^+2Fc^2^)/3'
_refine_ls_weighting_scheme       calc
_refine_ls_wR_factor_gt           0.1232
_refine_ls_wR_factor_ref          0.1478
_refine_special_details           ?
_olex2_refinement_description
;
1. Fixed Uiso
 At 1.2 times of:
  All C(H) groups, All C(H,H) groups, All Br(H,H) groups
2. Restrained distances
 N2-H2A
 0.87 with sigma of 0.02
 N3-H3A
 0.87 with sigma of 0.02
3.a Ternary CH refined with riding coordinates:
 C2(H2), C3(H3)
3.b Secondary CH2 refined with riding coordinates:
 C1(H1A,H1B), C11(H11A,H11B)
3.c Aromatic/amide H refined with riding coordinates:
 C5(H5), C6(H6), C7(H7), C8(H8), C13(H13), C14(H14), C15(H15), C16(H16),
 C17(H17), C18(H18)
;
_atom_sites_solution_hydrogens    mixed
_atom_sites_solution_primary      direct
_atom_sites_solution_secondary    ?
loop_
  _atom_site_label
  _atom_site_type_symbol
  _atom_site_fract_x
  _atom_site_fract_y
  _atom_site_fract_z
  _atom_site_U_iso_or_equiv
  _atom_site_adp_type
  _atom_site_occupancy
  _atom_site_site_symmetry_order
  _atom_site_calc_flag
  _atom_site_refinement_flags_posn
  _atom_site_refinement_flags_adp
  _atom_site_refinement_flags_occupancy
  _atom_site_disorder_assembly
  _atom_site_disorder_group
 C1 C 0.9769(7) 0.6609(4) 1.0693(3) 0.0774(13) Uani 1 1 d . . . . .
 H1A H 1.0863 0.6077 1.0777 0.093 Uiso 1 1 calc R . . . .
 H1B H 0.9366 0.6868 1.1403 0.093 Uiso 1 1 calc R . . . .
 C2 C 1.0775(9) 0.7599(5) 1.0072(4) 0.115(2) Uani 1 1 d . . . . .
 H2 H 0.9754 0.8168 1.0223 0.138 Uiso 1 1 calc R . . . .
 C3 C 1.0773(10) 0.7542(5) 0.8970(5) 0.129(2) Uani 1 1 d . . . . .
 H3 H 1.1932 0.7049 0.8806 0.155 Uiso 1 1 calc R . . . .
 C4 C 1.1423(7) 0.8559(4) 0.8301(4) 0.0752(14) Uani 1 1 d . . . . .
 C5 C 1.0034(9) 0.9374(5) 0.8172(4) 0.0987(17) Uani 1 1 d . . . . .
 H5 H 0.8659 0.9305 0.8522 0.118 Uiso 1 1 calc R . . . .
 C6 C 1.0616(11) 1.0297(5) 0.7536(5) 0.1095(19) Uani 1 1 d . . . . .
 H6 H 0.9662 1.0855 0.7466 0.131 Uiso 1 1 calc R . . . .
 C7 C 1.3994(10) 0.9632(7) 0.7100(5) 0.116(2) Uani 1 1 d . . . . .
 H7 H 1.5357 0.9730 0.6740 0.139 Uiso 1 1 calc R . . . .
 C8 C 1.3439(9) 0.8674(5) 0.7739(5) 0.1023(17) Uani 1 1 d . . . . .
 H8 H 1.4410 0.8122 0.7785 0.123 Uiso 1 1 calc R . . . .
 C9 C 0.7312(7) 0.6162(4) 0.9115(4) 0.0677(12) Uani 1 1 d . . . . .
 C10 C 0.4971(7) 0.5635(4) 0.7648(4) 0.0694(12) Uani 1 1 d . . . . .
 C11 C 0.2433(9) 0.4938(5) 0.6254(4) 0.1067(19) Uani 1 1 d . . . . .
 H11A H 0.3716 0.4945 0.5781 0.128 Uiso 1 1 calc R . . . .
 H11B H 0.1749 0.5629 0.6146 0.128 Uiso 1 1 calc R . . . .
 C12 C 0.0773(8) 0.3922(5) 0.5996(4) 0.0756(14) Uani 1 1 d . . . . .
 C13 C -0.1280(9) 0.3763(4) 0.6497(4) 0.0872(15) Uani 1 1 d . . . . .
 H13 H -0.1615 0.4286 0.7024 0.105 Uiso 1 1 calc R . . . .
 C14 C -0.2811(9) 0.2866(6) 0.6238(5) 0.109(2) Uani 1 1 d . . . . .
 H14 H -0.4179 0.2772 0.6594 0.131 Uiso 1 1 calc R . . . .
 C15 C -0.2384(11) 0.2095(6) 0.5463(5) 0.112(2) Uani 1 1 d . . . . .
 H15 H -0.3469 0.1488 0.5280 0.135 Uiso 1 1 calc R . . . .
 C16 C -0.0382(11) 0.2213(5) 0.4959(4) 0.1044(18) Uani 1 1 d . . . . .
 H16 H -0.0080 0.1677 0.4438 0.125 Uiso 1 1 calc R . . . .
 C17 C 0.1219(8) 0.3125(6) 0.5214(5) 0.0939(17) Uani 1 1 d . . . . .
 H17 H 0.2593 0.3205 0.4863 0.113 Uiso 1 1 calc R . . . .
 C18 C 1.2585(12) 1.0380(6) 0.7017(5) 0.117(2) Uani 1 1 d . . . . .
 H18 H 1.2959 1.1000 0.6579 0.140 Uiso 1 1 calc R . . . .
 N1 N 0.5487(5) 0.5532(3) 0.8691(3) 0.0649(9) Uani 1 1 d . . . . .
 N2 N 0.8717(7) 0.6890(3) 0.8543(3) 0.0824(12) Uani 1 1 d D . . . .
 N3 N 0.7773(6) 0.6037(3) 1.0144(3) 0.0748(11) Uani 1 1 d D . . . .
 O1 O 0.3163(4) 0.4890(2) 0.7369(2) 0.0793(9) Uani 1 1 d . . . . .
 O2 O 0.5889(5) 0.6278(2) 0.6980(2) 0.0834(9) Uani 1 1 d . . . . .
 Br1 Br 1.35744(8) 0.82900(5) 1.07361(4) 0.1013(3) Uani 1 1 d . . . . .
 H2A H 0.824(8) 0.698(4) 0.791(2) 0.122 Uiso 1 1 d DR . . . .
 H3A H 0.692(7) 0.548(3) 1.041(4) 0.122 Uiso 1 1 d DR . . . .

loop_
  _atom_site_aniso_label
  _atom_site_aniso_U_11
  _atom_site_aniso_U_22
  _atom_site_aniso_U_33
  _atom_site_aniso_U_23
  _atom_site_aniso_U_13
  _atom_site_aniso_U_12
 C1 0.083(3) 0.087(3) 0.056(3) 0.004(3) -0.017(2) -0.012(2)
 C2 0.106(4) 0.165(5) 0.052(3) 0.012(4) -0.018(3) -0.068(3)
 C3 0.129(4) 0.137(5) 0.101(5) 0.048(4) -0.053(4) -0.073(4)
 C4 0.064(3) 0.072(3) 0.082(3) 0.016(3) -0.020(2) -0.024(2)
 C5 0.082(3) 0.114(5) 0.100(4) 0.024(4) 0.004(3) 0.006(3)
 C6 0.128(5) 0.080(4) 0.119(5) 0.007(4) -0.022(4) 0.008(4)
 C7 0.074(4) 0.161(7) 0.100(5) 0.011(5) -0.001(3) -0.037(4)
 C8 0.076(3) 0.111(5) 0.117(5) -0.017(4) -0.031(3) 0.008(3)
 C9 0.069(3) 0.064(3) 0.067(3) 0.009(2) -0.007(2) -0.004(2)
 C10 0.067(3) 0.069(3) 0.068(3) 0.006(3) -0.008(2) -0.011(2)
 C11 0.122(4) 0.118(4) 0.064(3) 0.032(3) -0.044(3) -0.054(3)
 C12 0.077(3) 0.092(4) 0.050(3) 0.021(3) -0.017(2) -0.023(3)
 C13 0.093(4) 0.105(4) 0.060(3) 0.005(3) -0.020(3) -0.002(3)
 C14 0.085(4) 0.142(5) 0.087(5) 0.015(4) -0.020(3) -0.036(4)
 C15 0.122(5) 0.111(5) 0.086(5) 0.017(4) -0.026(4) -0.058(4)
 C16 0.140(5) 0.100(4) 0.066(4) -0.014(3) -0.024(4) -0.009(4)
 C17 0.082(3) 0.131(5) 0.065(4) 0.020(4) -0.009(3) -0.004(3)
 C18 0.110(5) 0.119(6) 0.102(5) 0.031(4) -0.024(4) -0.060(4)
 N1 0.067(2) 0.074(2) 0.048(2) 0.0032(18) -0.0105(16) -0.0149(17)
 N2 0.085(2) 0.090(3) 0.062(3) 0.016(2) -0.023(2) -0.036(2)
 N3 0.077(2) 0.082(3) 0.058(2) 0.007(2) -0.0146(19) -0.0225(19)
 O1 0.0832(19) 0.090(2) 0.0551(19) 0.0194(17) -0.0224(15) -0.0279(16)
 O2 0.090(2) 0.088(2) 0.063(2) 0.0180(17) -0.0119(16) -0.0280(17)
 Br1 0.0785(4) 0.1218(6) 0.0934(5) -0.0087(4) -0.0217(3) -0.0243(3)

_geom_special_details
;
 All esds (except the esd in the dihedral angle between two l.s. planes)
 are estimated using the full covariance matrix.  The cell esds are taken
 into account individually in the estimation of esds in distances, angles
 and torsion angles; correlations between esds in cell parameters are only
 used when they are defined by crystal symmetry.  An approximate (isotropic)
 treatment of cell esds is used for estimating esds involving l.s. planes.
;
loop_
  _geom_bond_atom_site_label_1
  _geom_bond_atom_site_label_2
  _geom_bond_distance
  _geom_bond_site_symmetry_2
  _geom_bond_publ_flag
 C1 H1A 0.9700 . ?
 C1 H1B 0.9700 . ?
 C1 C2 1.484(6) . ?
 C1 N3 1.457(5) . ?
 C2 H2 0.9800 . ?
 C2 C3 1.370(7) . ?
 C2 Br1 1.943(5) . ?
 C3 H3 0.9800 . ?
 C3 C4 1.491(6) . ?
 C3 N2 1.460(6) . ?
 C4 C5 1.360(7) . ?
 C4 C8 1.393(7) . ?
 C5 H5 0.9300 . ?
 C5 C6 1.374(7) . ?
 C6 H6 0.9300 . ?
 C6 C18 1.342(8) . ?
 C7 H7 0.9300 . ?
 C7 C8 1.406(7) . ?
 C7 C18 1.301(8) . ?
 C8 H8 0.9300 . ?
 C9 N1 1.342(5) . ?
 C9 N2 1.347(5) . ?
 C9 N3 1.323(5) . ?
 C10 N1 1.344(5) . ?
 C10 O1 1.347(5) . ?
 C10 O2 1.225(4) . ?
 C11 H11A 0.9700 . ?
 C11 H11B 0.9700 . ?
 C11 C12 1.489(6) . ?
 C11 O1 1.456(5) . ?
 C12 C13 1.377(6) . ?
 C12 C17 1.388(7) . ?
 C13 H13 0.9300 . ?
 C13 C14 1.346(7) . ?
 C14 H14 0.9300 . ?
 C14 C15 1.358(8) . ?
 C15 H15 0.9300 . ?
 C15 C16 1.350(7) . ?
 C16 H16 0.9300 . ?
 C16 C17 1.382(7) . ?
 C17 H17 0.9300 . ?
 C18 H18 0.9300 . ?
 N2 H2A 0.849(19) . ?
 N3 H3A 0.858(19) . ?

loop_
  _geom_angle_atom_site_label_1
  _geom_angle_atom_site_label_2
  _geom_angle_atom_site_label_3
  _geom_angle
  _geom_angle_site_symmetry_1
  _geom_angle_site_symmetry_3
  _geom_angle_publ_flag
 H1A C1 H1B 108.1 . . ?
 C2 C1 H1A 109.5 . . ?
 C2 C1 H1B 109.5 . . ?
 N3 C1 H1A 109.5 . . ?
 N3 C1 H1B 109.5 . . ?
 N3 C1 C2 110.6(3) . . ?
 C1 C2 H2 102.5 . . ?
 C1 C2 Br1 110.8(3) . . ?
 C3 C2 C1 120.3(5) . . ?
 C3 C2 H2 102.5 . . ?
 C3 C2 Br1 115.2(4) . . ?
 Br1 C2 H2 102.5 . . ?
 C2 C3 H3 103.4 . . ?
 C2 C3 C4 122.7(5) . . ?
 C2 C3 N2 111.5(4) . . ?
 C4 C3 H3 103.4 . . ?
 N2 C3 H3 103.4 . . ?
 N2 C3 C4 110.1(4) . . ?
 C5 C4 C3 121.7(5) . . ?
 C5 C4 C8 117.6(4) . . ?
 C8 C4 C3 120.7(5) . . ?
 C4 C5 H5 119.2 . . ?
 C4 C5 C6 121.5(5) . . ?
 C6 C5 H5 119.2 . . ?
 C5 C6 H6 120.6 . . ?
 C18 C6 C5 118.9(6) . . ?
 C18 C6 H6 120.6 . . ?
 C8 C7 H7 120.3 . . ?
 C18 C7 H7 120.3 . . ?
 C18 C7 C8 119.4(6) . . ?
 C4 C8 C7 119.6(5) . . ?
 C4 C8 H8 120.2 . . ?
 C7 C8 H8 120.2 . . ?
 N1 C9 N2 123.4(4) . . ?
 N3 C9 N1 117.9(4) . . ?
 N3 C9 N2 118.6(4) . . ?
 N1 C10 O1 110.2(4) . . ?
 O2 C10 N1 129.6(4) . . ?
 O2 C10 O1 120.2(4) . . ?
 H11A C11 H11B 108.3 . . ?
 C12 C11 H11A 109.9 . . ?
 C12 C11 H11B 109.9 . . ?
 O1 C11 H11A 109.9 . . ?
 O1 C11 H11B 109.9 . . ?
 O1 C11 C12 109.0(3) . . ?
 C13 C12 C11 121.2(6) . . ?
 C13 C12 C17 117.9(5) . . ?
 C17 C12 C11 120.9(5) . . ?
 C12 C13 H13 119.4 . . ?
 C14 C13 C12 121.2(6) . . ?
 C14 C13 H13 119.4 . . ?
 C13 C14 H14 119.6 . . ?
 C13 C14 C15 120.9(6) . . ?
 C15 C14 H14 119.6 . . ?
 C14 C15 H15 120.1 . . ?
 C16 C15 C14 119.9(5) . . ?
 C16 C15 H15 120.1 . . ?
 C15 C16 H16 119.9 . . ?
 C15 C16 C17 120.3(6) . . ?
 C17 C16 H16 119.9 . . ?
 C12 C17 H17 120.1 . . ?
 C16 C17 C12 119.9(5) . . ?
 C16 C17 H17 120.1 . . ?
 C6 C18 H18 118.5 . . ?
 C7 C18 C6 123.0(6) . . ?
 C7 C18 H18 118.5 . . ?
 C9 N1 C10 119.5(3) . . ?
 C3 N2 H2A 122(4) . . ?
 C9 N2 C3 124.6(4) . . ?
 C9 N2 H2A 113(4) . . ?
 C1 N3 H3A 123(4) . . ?
 C9 N3 C1 123.8(3) . . ?
 C9 N3 H3A 112(4) . . ?
 C10 O1 C11 114.9(3) . . ?

loop_
  _geom_torsion_atom_site_label_1
  _geom_torsion_atom_site_label_2
  _geom_torsion_atom_site_label_3
  _geom_torsion_atom_site_label_4
  _geom_torsion
  _geom_torsion_site_symmetry_1
  _geom_torsion_site_symmetry_2
  _geom_torsion_site_symmetry_3
  _geom_torsion_site_symmetry_4
  _geom_torsion_publ_flag
 C1 C2 C3 C4 170.1(5) . . . . ?
 C1 C2 C3 N2 36.3(9) . . . . ?
 C2 C1 N3 C9 18.3(7) . . . . ?
 C2 C3 C4 C5 -74.6(8) . . . . ?
 C2 C3 C4 C8 108.8(7) . . . . ?
 C2 C3 N2 C9 -18.3(9) . . . . ?
 C3 C4 C5 C6 -178.5(5) . . . . ?
 C3 C4 C8 C7 179.0(5) . . . . ?
 C4 C3 N2 C9 -158.0(5) . . . . ?
 C4 C5 C6 C18 1.2(9) . . . . ?
 C5 C4 C8 C7 2.3(7) . . . . ?
 C5 C6 C18 C7 -1.0(10) . . . . ?
 C8 C4 C5 C6 -1.9(8) . . . . ?
 C8 C7 C18 C6 1.5(10) . . . . ?
 C11 C12 C13 C14 177.7(4) . . . . ?
 C11 C12 C17 C16 -177.4(4) . . . . ?
 C12 C11 O1 C10 167.9(4) . . . . ?
 C12 C13 C14 C15 -0.8(8) . . . . ?
 C13 C12 C17 C16 0.3(7) . . . . ?
 C13 C14 C15 C16 1.4(9) . . . . ?
 C14 C15 C16 C17 -1.2(9) . . . . ?
 C15 C16 C17 C12 0.3(8) . . . . ?
 C17 C12 C13 C14 -0.1(7) . . . . ?
 C18 C7 C8 C4 -2.1(9) . . . . ?
 N1 C9 N2 C3 -176.8(5) . . . . ?
 N1 C9 N3 C1 176.0(4) . . . . ?
 N1 C10 O1 C11 179.2(4) . . . . ?
 N2 C3 C4 C5 59.8(8) . . . . ?
 N2 C3 C4 C8 -116.8(6) . . . . ?
 N2 C9 N1 C10 -1.4(7) . . . . ?
 N2 C9 N3 C1 -2.5(7) . . . . ?
 N3 C1 C2 C3 -36.8(8) . . . . ?
 N3 C1 C2 Br1 -175.3(3) . . . . ?
 N3 C9 N1 C10 -179.8(4) . . . . ?
 N3 C9 N2 C3 1.7(8) . . . . ?
 O1 C10 N1 C9 176.6(4) . . . . ?
 O1 C11 C12 C13 64.8(6) . . . . ?
 O1 C11 C12 C17 -117.6(5) . . . . ?
 O2 C10 N1 C9 -3.3(7) . . . . ?
 O2 C10 O1 C11 -0.9(6) . . . . ?
 Br1 C2 C3 C4 -53.1(8) . . . . ?
 Br1 C2 C3 N2 173.1(4) . . . . ?

_shelx_res_file
;
    shelxl.res created by SHELXL-2014/7

TITL _mad120
CELL 1.54187 5.9914 11.8226 12.4394 91.332 90.36 97.099
ZERR 2 0.0005 0.0011 0.0011 0.006 0.006 0.007
LATT 1
SFAC C H N O Br
UNIT 36 36 6 4 2
DFIX 0.87 N2 H2a
DFIX 0.87 N3 H3a

L.S. 5
PLAN  20
SIZE 0.2 0.2 0.2
TEMP 20
BOND $H
CONF
LIST 4
fmap 2
acta
MORE -1
MERG 2
SHEL 99999 0.84
OMIT 1 3 8
REM <olex2.extras>
REM <HklSrc "%.\\shelxl.hkl">
REM </olex2.extras>

WGHT    0.069300
FVAR       0.72165
C1    1    0.976857    0.660916    1.069266    11.00000    0.08346    0.08660 =
         0.05638    0.00356   -0.01677   -0.01166
AFIX  23
H1A   2    1.086265    0.607691    1.077730    11.00000   -1.20000
H1B   2    0.936619    0.686778    1.140308    11.00000   -1.20000
AFIX   0
C2    1    1.077506    0.759858    1.007167    11.00000    0.10594    0.16535 =
         0.05179    0.01182   -0.01816   -0.06824
AFIX  13
H2    2    0.975438    0.816826    1.022309    11.00000   -1.20000
AFIX   0
C3    1    1.077326    0.754204    0.897021    11.00000    0.12851    0.13716 =
         0.10108    0.04762   -0.05296   -0.07340
AFIX  13
H3    2    1.193232    0.704867    0.880630    11.00000   -1.20000
AFIX   0
C4    1    1.142304    0.855893    0.830126    11.00000    0.06389    0.07173 =
         0.08215    0.01578   -0.02004   -0.02400
C5    1    1.003399    0.937399    0.817208    11.00000    0.08213    0.11389 =
         0.09954    0.02366    0.00443    0.00597
AFIX  43
H5    2    0.865884    0.930492    0.852238    11.00000   -1.20000
AFIX   0
C6    1    1.061607    1.029686    0.753598    11.00000    0.12760    0.08033 =
         0.11931    0.00712   -0.02208    0.00848
AFIX  43
H6    2    0.966177    1.085481    0.746594    11.00000   -1.20000
AFIX   0
C7    1    1.399400    0.963216    0.709990    11.00000    0.07354    0.16129 =
         0.10005    0.01065   -0.00114   -0.03729
AFIX  43
H7    2    1.535700    0.973044    0.673953    11.00000   -1.20000
AFIX   0
C8    1    1.343865    0.867449    0.773853    11.00000    0.07638    0.11086 =
         0.11724   -0.01663   -0.03132    0.00763
AFIX  43
H8    2    1.441025    0.812159    0.778517    11.00000   -1.20000
AFIX   0
C9    1    0.731213    0.616172    0.911524    11.00000    0.06940    0.06441 =
         0.06663    0.00919   -0.00680   -0.00362
C10   1    0.497115    0.563541    0.764767    11.00000    0.06706    0.06891 =
         0.06762    0.00625   -0.00753   -0.01095
C11   1    0.243291    0.493750    0.625357    11.00000    0.12192    0.11764 =
         0.06400    0.03173   -0.04360   -0.05450
AFIX  23
H11A  2    0.371636    0.494546    0.578114    11.00000   -1.20000
H11B  2    0.174943    0.562890    0.614595    11.00000   -1.20000
AFIX   0
C12   1    0.077309    0.392176    0.599637    11.00000    0.07716    0.09230 =
         0.04981    0.02090   -0.01718   -0.02261
C13   1   -0.128025    0.376326    0.649738    11.00000    0.09255    0.10495 =
         0.06042    0.00487   -0.02006   -0.00159
AFIX  43
H13   2   -0.161535    0.428554    0.702443    11.00000   -1.20000
AFIX   0
C14   1   -0.281109    0.286586    0.623789    11.00000    0.08518    0.14222 =
         0.08661    0.01485   -0.02010   -0.03595
AFIX  43
H14   2   -0.417931    0.277204    0.659400    11.00000   -1.20000
AFIX   0
C15   1   -0.238439    0.209541    0.546286    11.00000    0.12196    0.11095 =
         0.08636    0.01679   -0.02590   -0.05801
AFIX  43
H15   2   -0.346911    0.148823    0.527951    11.00000   -1.20000
AFIX   0
C16   1   -0.038239    0.221252    0.495894    11.00000    0.14023    0.10041 =
         0.06555   -0.01403   -0.02404   -0.00922
AFIX  43
H16   2   -0.007995    0.167689    0.443777    11.00000   -1.20000
AFIX   0
C17   1    0.121903    0.312506    0.521446    11.00000    0.08153    0.13101 =
         0.06548    0.02022   -0.00881   -0.00436
AFIX  43
H17   2    0.259319    0.320533    0.486320    11.00000   -1.20000
AFIX   0
C18   1    1.258514    1.037963    0.701735    11.00000    0.11042    0.11946 =
         0.10244    0.03148   -0.02390   -0.06032
AFIX  43
H18   2    1.295916    1.099987    0.657890    11.00000   -1.20000
AFIX   0
N1    3    0.548673    0.553228    0.869081    11.00000    0.06668    0.07357 =
         0.04840    0.00323   -0.01050   -0.01490
N2    3    0.871746    0.689049    0.854347    11.00000    0.08462    0.08959 =
         0.06182    0.01645   -0.02266   -0.03556
N3    3    0.777279    0.603651    1.014395    11.00000    0.07677    0.08153 =
         0.05791    0.00679   -0.01456   -0.02251
O1    4    0.316339    0.489000    0.736864    11.00000    0.08316    0.09044 =
         0.05507    0.01937   -0.02236   -0.02794
O2    4    0.588950    0.627754    0.698023    11.00000    0.08975    0.08809 =
         0.06327    0.01804   -0.01193   -0.02801
BR1   5    1.357437    0.828998    1.073606    11.00000    0.07852    0.12183 =
         0.09342   -0.00866   -0.02170   -0.02432
H2A   2    0.824233    0.698277    0.791117    11.00000   -1.20000
H3A   2    0.692128    0.547945    1.041364    11.00000   -1.20000
HKLF 4

REM  _mad120
REM R1 =  0.0497 for    1653 Fo > 4sig(Fo)  and  0.0882 for all    2961 data
REM    223 parameters refined using      2 restraints

END

WGHT      0.0693      0.0000

REM Highest difference peak  0.329,  deepest hole -0.308,  1-sigma level  0.057
Q1    1   0.9518  0.8094  0.9418  11.00000  0.05    0.33
Q2    1   1.0889  0.7388  0.8746  11.00000  0.05    0.30
Q3    1   1.4543  0.8546  0.6870  11.00000  0.05    0.25
Q4    1   1.3741  0.8079  0.9601  11.00000  0.05    0.25
Q5    1   1.1170  0.9751  0.8592  11.00000  0.05    0.23
Q6    1   1.4968  0.8779  1.0248  11.00000  0.05    0.22
Q7    1   1.4178  0.7449  1.0556  11.00000  0.05    0.22
Q8    1   1.2240  0.6968  0.9988  11.00000  0.05    0.20
Q9    1   1.3289  0.8511  1.1977  11.00000  0.05    0.20
Q10   1   0.2075  0.2630  0.5046  11.00000  0.05    0.19
Q11   1   0.6717  0.5479  0.6625  11.00000  0.05    0.19
Q12   1   0.0577  0.3867  0.5478  11.00000  0.05    0.19
Q13   1   1.2812  0.8868  1.0985  11.00000  0.05    0.19
Q14   1   0.7950  0.6169  0.8865  11.00000  0.05    0.19
Q15   1   0.0285  0.3853  0.6365  11.00000  0.05    0.18
Q16   1   1.3097  0.9044  0.7779  11.00000  0.05    0.18
Q17   1   0.9970  0.9598  0.7985  11.00000  0.05    0.18
Q18   1   0.6749  0.5705  1.0584  11.00000  0.05    0.17
Q19   1  -0.4083  0.1914  0.5406  11.00000  0.05    0.17
Q20   1   1.3803  1.0850  0.7433  11.00000  0.05    0.17
;
_shelx_res_checksum               9610
_shelx_hkl_file
;
   0   0   1 2076.81  125.16
   0   0   1 2587.88  146.58
   0   0   1 2294.35  137.32
   0   0  -1 2216.45  133.30
   0   0  -1 2055.84  119.47
   0   0  -1 2075.21  124.66
   0   1   0  306.45   15.38
   0  -1   0  269.31    9.51
   0  -1   0  314.05   15.82
   0  -1   0  239.08   10.55
   0   1   0  263.51    9.39
   0   1   0  278.82    7.63
   0   1   0  280.35   10.11
   0  -1   1  282.07    9.28
   0  -1   1  326.52   15.44
   0  -1   1  320.30    9.11
   0  -1   1  269.52   10.60
   0  -1   1  258.27   11.36
   0   1  -1  280.78   11.31
   0   1  -1  272.52   11.25
   0   1  -1  282.93    9.52
   0   1  -1  323.28   14.14
   0   1   1  192.70    4.85
   0   1   1  162.61    5.60
   0   1   1  166.00    6.29
   0  -1  -1  165.42    6.24
   0   0   2  109.11    4.13
   0   0   2  101.28    3.90
   0   0   2  104.63    3.24
   0   0  -2  121.04    2.74
   0   0  -2  106.64    4.30
   1   0   0   24.56    1.81
  -1   0   0   17.92    1.80
  -1   0   0   21.94    1.57
   1   0   0   18.66    1.76
   1   0   0   20.08    1.35
  -1   0   0   23.00    1.77
   0   2   0  276.93    9.18
   0   2   0  269.86   12.88
   0  -2   0  289.37   24.63
   0  -2   0  216.78   11.88
   0   2   0  281.76   23.22
   0   2   0  298.07   13.89
   0  -2   0  258.84   12.31
  -1   1   0  866.96   39.26
   1  -1   0  909.48   44.85
  -1   1   0  867.60   43.40
   1  -1   0  889.04   60.27
   1  -1   0  894.22   43.27
  -1   1   0  906.89   45.20
   1  -1   0  890.28   46.19
   1  -1   0  841.77   37.21
  -1   1   0  888.88   44.08
   0   1  -2   33.89    2.32
   0  -1   2   34.65    3.41
   0  -1   2   36.06    2.09
   0   1  -2   32.37    2.61
   0   1  -2   46.01    2.82
   0   1   2  349.70   12.61
   0  -1  -2  372.34   15.49
   0   1   2  342.54   12.98
   0   1   2  388.10   12.65
   0  -1  -2  414.52   13.23
   0   1   2  353.03   13.26
  -1   0   1  307.43   12.44
  -1   0   1  296.15   10.73
  -1   0   1  340.55   14.09
   1   0  -1  378.66   15.21
   1   0  -1  350.93   14.30
   1   0  -1  316.31   12.94
   1   0  -1  307.11   12.41
   1   0  -1  316.05   13.14
  -1   0   1  318.93   12.98
   0  -2   1  869.12   49.08
   0   2  -1  892.61   41.27
   0   2  -1  961.35   60.22
   0  -2   1  775.39   43.60
   0  -2   1  914.12   42.41
   0   2  -1  915.23   50.26
   0   2  -1  990.93   53.76
   0  -2   1  853.04   57.94
   1   0   1  189.79    6.11
   1   0   1  168.68    6.90
  -1   0  -1  194.87    6.77
  -1   0  -1  181.62    6.49
   1   0   1  177.66    6.24
   1   0   1  181.87    6.77
  -1   0  -1  185.89    7.48
  -1   0  -1  183.57    7.19
   0   2   1  119.55   19.74
   0   2   1  108.89    6.55
   0   2   1   90.91    4.57
   0  -2  -1   90.38    5.02
   0  -2  -1   78.86    4.89
   0   2   1   91.76    2.51
  -1   1  -1   23.41    1.97
  -1   1  -1   30.50    2.46
  -1   1  -1   33.92    1.74
  -1   1  -1   27.45    2.71
   1  -1   1   28.22    2.12
   1  -1   1   35.90    1.66
   1  -1   1   30.50    2.63
   1  -1   1   35.50    2.63
  -1   1   1  514.71   31.92
  -1   1   1  516.34   24.08
   1  -1  -1  551.28   21.75
  -1   1   1  539.29   24.92
   1  -1  -1  533.96   25.04
   1  -1  -1  513.28   24.02
  -1   1   1  508.21   18.89
   1  -1  -1  554.69   25.70
  -1   1   1  525.73   24.77
   1   1   0 1377.37   76.27
  -1  -1   0 1550.63   87.08
  -1  -1   0 1348.05   72.95
   1   1   0 1381.97   78.28
  -1  -1   0 1399.58   78.88
  -1  -1   0 1365.39   74.18
   1   1   0 1493.55   83.63
  -1  -1   1   27.76    1.82
   1   1  -1   29.85    2.31
   1   1  -1   32.30    4.76
  -1  -1   1   27.99    2.30
   1   1  -1   27.19    2.36
  -1  -1   1   28.15    2.28
  -1  -1   1   26.30    2.09
   1   1  -1   27.53    2.27
  -1  -1   1   28.93    2.07
   1   1   1  551.76   22.91
   1   1   1  546.33   24.32
   1   1   1  657.37   29.28
  -1  -1  -1  589.75   25.74
  -1  -1  -1  528.14   22.06
   1  -2   0 6462.92  631.45
  -1   2   0 5695.63  570.84
  -1   2   0 7236.95  794.46
  -1   2   0 6849.44  701.75
  -1   2   0 6983.36  711.03
   1  -2   0 6498.29  672.36
  -1   2   0 7160.80  727.82
   1  -2   0 6872.75  766.19
  -1   2   0 6684.06  696.63
   0   2  -2 9718.44 1174.45
   0  -2   2 8925.52 1083.07
   0  -2   2 9199.86 1070.69
   0  -2   2 9533.67 1168.00
  -1   0   2 2546.38  180.17
  -1   0   2 2433.04  165.25
   0   2  -2 9939.56 1127.96
  -1   0   2 2589.59  182.05
   0   2  -2 9551.61 1162.33
   0   2  -2 9634.07 1124.54
   0  -2   2 9999.00 1235.24
   1   0  -2 2471.57  170.59
   1   0  -2 2552.82  180.73
   1   0  -2 2579.36  182.25
  -1   0   2 2474.50  168.35
   1   0  -2 2476.22  169.51
   1   0   2   66.98    3.93
  -1   0  -2   64.41    3.11
  -1   0  -2   58.80    2.50
   1   0   2   63.10    3.03
   1   0   2   64.05    3.11
  -1   0  -2   60.74    3.54
   1   0   2   63.31    3.29
   0   2   2 1097.07   69.15
   1  -2   1 1096.10   79.92
  -1   2  -1 1015.54   60.20
  -1   2  -1  996.48   54.64
  -1   2  -1 1136.92   57.82
   0   2   2 1023.01   51.14
   0   2   2  882.08   41.64
   0   2   2  934.16   46.80
   0  -2  -2 1008.43   49.70
   0  -2  -2  924.83   46.01
   1  -2   1  960.58   50.47
  -1   2  -1 1071.03   52.19
   1  -2   1 1016.57   59.22
   1  -2   1  904.19   44.98
  -1   2   1 8802.32 1006.75
  -1   2   1 8477.94  929.00
   1  -2  -1 8783.42 1023.57
  -1   2   1 8998.68 1110.60
  -1   2   1 8982.03 1048.49
  -1   2   1 9231.13 1079.14
   1  -2  -1 9136.35 1161.05
  -1   2   1 8711.32 1012.84
   1  -2  -1 8833.64  970.47
   1  -1   2  104.46    5.40
  -1   1  -2  110.68    5.10
  -1   1  -2  102.31    6.72
   1  -1   2   99.13    3.74
   1  -1   2  101.24    6.33
   1  -1   2   98.15    4.73
   1  -1   2  109.64    5.34
  -1   1   2 4350.67  367.45
  -1   1   2 4930.37  460.63
   1  -1  -2 4591.86  408.85
   1  -1  -2 4532.32  394.21
   1  -1  -2 4245.52  361.74
   1  -1  -2 4842.26  431.33
  -1   1   2 4691.61  418.80
  -1   1   2 4445.21  386.99
  -1   1   2 4843.13  433.04
   0   0   3  102.80    4.56
   0   0  -3   85.80    4.54
   0   0   3   90.78    4.26
   0   0   3  102.36    3.73
   0   0   3   85.80    4.64
  -1  -1   2  380.01   18.38
   1   1  -2  385.94   17.16
  -1  -1   2  379.46   16.39
  -1  -1   2  409.63   17.86
   1   1  -2  401.98   17.41
  -1  -1   2  377.79   17.63
   1   1  -2  359.32   15.36
  -1  -1   2  356.31   16.96
  -1  -2   0 1908.52  124.25
   0  -1   3 5080.21  432.24
  -1  -2   0 1857.13  113.64
   1   2   0 1849.62  113.32
   1   2   0 1958.53  125.81
  -1  -2   0 1855.71  121.12
   0  -1   3 4369.78  382.52
   0  -1   3 4729.40  439.73
   0   1  -3 4448.10  392.25
   1   2   0 1945.09  125.99
   1   2   0 1992.28  149.44
   0  -1   3 4697.57  400.84
   1   2   0 1949.71  119.99
   0   3   0  462.77   24.54
   0   3   0  445.26   24.37
   0  -3   0  423.31   40.84
   0  -3   0  355.73   20.93
   0   3   0  441.51   16.91
   0   3   0  449.21   41.64
   0  -3   0  401.98   21.39
  -1  -1  -2 2116.82  138.09
   1   1   2 2261.26  150.06
   1   1   2 2044.78  132.88
  -1  -1  -2 2188.16  143.16
   1   1   2 2179.29  139.34
   0   1   3 1453.98   84.28
   0   1   3 1492.64   87.96
   0  -1  -3 1610.00   95.54
   0   1   3 1931.29  111.86
   1   2  -1 1180.10   80.84
  -1  -2   1 1158.99   64.59
   1   2  -1 1269.87   70.80
   1   2  -1 1259.68   71.97
  -1  -2   1 1247.22   70.02
  -1  -2   1 1248.36   72.81
  -1  -2   1 1159.30   71.58
   1   2  -1 1246.42   69.36
   0  -3   1  144.89   20.86
   0   3  -1  156.88    6.03
   0   3  -1  179.40   11.28
   0   3  -1  166.48   10.89
   0  -3   1  131.67    9.63
   0  -3   1  154.37   13.50
   0  -3   1  159.20    7.35
   0   3  -1  153.61   16.27
   1   2   1 2013.22  130.13
   1   2   1 1995.52  122.44
   1   2   1 2090.36  136.92
  -1  -2  -1 2038.58  135.42
  -1  -2  -1 1885.82  116.55
  -1  -2  -1 1940.84  116.55
   1   2   1 1891.95  111.44
   0   3   1 1816.57  104.56
   0   3   1 1967.32  128.33
   0   3   1 1960.89  174.31
   0   3   1 1859.39  127.99
   0  -3  -1 1696.98  115.12
   0  -3  -1 1886.34  123.79
   0  -3  -1 1677.46   95.12
   1  -2   2  573.68   43.18
   1  -2   2  435.08   20.01
   1  -2   2  456.44   21.12
  -1   2  -2  546.08   19.47
  -1   2  -2  581.80   25.23
   1  -2   2  462.86   26.66
  -1   2  -2  475.80   26.86
  -1   2  -2  470.07   23.15
  -1   2   2 1017.29   51.93
   1  -2  -2 1006.02   72.17
  -1   2   2 1098.82   57.62
  -1   2   2 1013.06   75.28
   1  -2  -2 1049.28   48.87
  -1   2   2 1022.66   60.99
  -1   2   2 1100.29   62.96
  -1   2   2 1107.31   50.46
   1  -2  -2 1092.48   62.09
   1  -3   0 4513.53  483.08
  -1   3   0 4265.32  391.68
  -1   3   0 4535.76  408.34
   1  -3   0 4607.71  423.36
  -1   3   0 4552.43  406.71
  -1   3   0 4642.84  433.47
  -1   3   0 4724.86  483.10
   1  -3   0 4296.79  360.25
   1  -3   0 4426.67  367.88
   0  -2   3   12.79    1.70
   0   2  -3    8.86    2.49
   0   2  -3   12.05    2.29
   0  -2   3   12.95    1.65
   0  -2   3   13.48    3.22
   0  -2   3   12.23    5.95
   0  -2   3   10.91    0.86
   0   2  -3   11.41    1.96
   1   0  -3  824.42   39.36
  -1   0   3  776.44   42.52
  -1   0   3  863.01   45.07
   1   0  -3  854.18   45.92
  -1   0   3  793.41   39.69
   1   0  -3  833.76   38.75
   1   0  -3  810.82   44.36
  -1   0   3  807.76   43.79
  -1   0   3  750.71   36.64
   1   0   3 4901.00  442.51
   1   0   3 5184.18  470.28
   1   0   3 4872.72  452.49
   1   0   3 4738.09  436.94
  -1   0  -3 5158.43  461.76
   1   0   3 5354.70  482.22
   1   2  -2 2123.39  145.67
   1   2  -2 1924.42  130.13
  -1  -2   2 1832.89  128.49
  -1  -2   2 1880.65  127.16
   1   2  -2 2015.47  133.37
  -1  -2   2 2017.03  129.61
   1   2  -2 2003.18  129.83
  -1  -2   2 1902.21  131.30
  -1  -2   2 1834.84  118.34
  -1   3  -1    4.87    1.54
  -1   3  -1    5.44    4.22
  -1   3  -1    1.73    2.84
   1  -3   1   12.17    5.13
   1  -3   1    8.12    1.14
  -1   3  -1    3.13    1.15
   1  -3   1    8.54    2.47
   0   2   3 1257.93   71.42
   0   2   3 1253.85   64.17
   0  -2  -3 1294.04   71.29
   0  -2  -3 1229.18   63.09
   0   2   3 1264.10   65.86
   0   2   3 1186.85   63.50
   0  -3   2   74.14   10.42
   0   3  -2   83.82    7.18
   0   3  -2   74.21    4.99
   0  -3   2   68.07   11.44
   0   3  -2   82.22   13.59
   0   3  -2   91.35    7.12
   0   3  -2   77.04    3.03
   0  -3   2   69.48    6.17
   0  -3   2   73.67    3.98
   1  -1   3  376.16   23.92
  -1   1  -3  467.40   18.69
  -1   1  -3  352.08   18.62
  -1   1  -3  423.45   19.13
   1  -1   3  481.16   17.30
   1  -1   3  368.06   18.01
  -1   3   1 4254.74  389.06
   1  -3  -1 4623.54  424.34
   1  -3  -1 4737.01  515.20
  -1   3   1 4197.95  392.10
  -1   3   1 4872.43  451.21
  -1   3   1 4628.60  418.24
  -1   3   1 4777.08  507.39
  -1   1   3  515.68   21.83
  -1   1   3  544.31   27.66
  -1   1   3  507.59   25.61
  -1   1   3  557.49   39.06
   1  -1  -3  518.57   22.55
  -1   1   3  517.71   22.02
   1  -1  -3  540.69   27.34
   1   2   2   39.62    3.99
   1   2   2   41.32    2.55
  -1  -2  -2   36.91    2.63
  -1  -2  -2   42.19    2.20
   1   2   2   37.05    3.29
   0   3   2  859.80   45.28
   0  -3  -2  830.60   42.01
   0   3   2  889.13   47.35
   0  -3  -2  763.62   40.86
   0  -3  -2  830.25   37.37
   0   3   2  958.84   84.55
   0   3   2  830.04   34.91
  -1  -1   3  932.61   50.53
  -1  -1   3  942.76   49.39
   1   1  -3  947.05   48.29
   1   1  -3  921.44   47.47
  -1  -1   3  918.93   48.89
   1   1  -3  972.62   51.08
  -1  -1   3  882.56   49.24
  -1  -1   3  877.15   50.57
   1   1   3 3282.69  228.96
   1   1   3 3189.55  230.92
  -1  -1  -3 3477.20  253.95
   1   1   3 2857.11  214.16
  -1  -1  -3 2520.23  202.93
   1   1   3 3225.32  236.91
   0   0  -4    2.05    1.20
   0   0   4    3.66    1.04
   0   0   4    2.37    1.12
   0   0   4    2.93    1.06
   0   0   4    4.02    1.31
   1   3   0  162.41    8.47
  -1  -3   0  166.77    8.62
  -1  -3   0  150.68    9.91
   1   3   0  157.95   20.99
   1   3   0  178.39    9.23
   1   3   0  187.41    7.62
  -1  -3   0  158.01    6.06
   1   3   0  152.56    9.14
  -1   2  -3 3318.98  283.00
  -1   2  -3 3331.55  265.78
   1  -2   3 3595.08  287.71
   1  -2   3 3497.36  314.51
   1  -2   3 3177.71  274.81
   1  -2   3 3222.70  259.74
  -1   2  -3 3446.91  276.07
  -1   3  -2 1724.59   95.20
   1  -3   2 1616.81  116.19
   1  -3   2 1669.05  139.72
   1  -3   2 1550.38   94.40
  -1   3  -2 1718.18  122.86
   1  -3   2 1670.56  104.77
  -1   3  -2 1949.78  126.28
  -1   3  -2 1625.07  108.10
   0  -1   4  422.29   17.34
   0  -1   4  415.48   23.43
   0   1  -4  411.23   15.79
   0  -1   4  395.18   18.04
   0  -1   4  399.17   19.75
   0  -1   4  403.08   14.59
   0   1  -4  402.51   19.36
   1   3  -1   12.96    2.48
   1   3  -1   13.26    2.01
  -1  -3   1   12.91    2.81
  -1  -3   1   10.27    1.36
   1   3  -1   11.08    6.69
  -1  -3   1   11.28    2.60
   1   3  -1   10.01    1.86
   1   3  -1   15.32    1.87
  -1   2   3  396.36   33.78
  -1   2   3  398.23   23.05
  -1   2   3  420.31   17.03
  -1   2   3  438.42   18.86
   1  -2  -3  438.64   22.44
  -1   2   3  441.20   16.56
  -1   2   3  458.73   23.37
   1  -2  -3  467.33   17.74
  -1   3   2    8.22    6.73
  -1   3   2    4.64    2.24
   1  -3  -2    6.24    4.46
  -1   3   2    6.73    2.17
  -1   3   2    7.14    1.39
  -1   3   2    1.74    1.88
   1  -3  -2    6.33    2.03
   0   1   4 2002.78  131.78
   1   3   1 1509.62   91.61
   0   1   4 1901.25  120.05
   0  -1  -4 2047.17  133.03
   1   3   1 1459.90   90.05
   1   3   1 1464.29   91.99
  -1  -3  -1 1445.39   83.40
   0   1   4 1815.59  121.45
  -1  -3  -1 1533.05   97.28
   1   3   1 1445.43   81.63
  -1  -3  -1 1400.46   79.41
   1   3   1 1629.06  136.87
   2   0   0   20.43    2.55
  -2   0   0   19.19    2.59
   2   0   0   19.45    2.52
  -2   0   0   20.09    2.55
   2   0   0   19.60    1.72
  -2   0   0   17.88    1.67
   2   0   0   18.50    2.12
  -2   0   0   20.30    2.22
   2  -1   0 1027.13   56.29
   2  -1   0  961.90   70.88
  -2   1   0 1013.44   57.91
   2  -1   0 1014.53   52.39
  -2   1   0 1049.01   53.99
   2  -1   0 1031.20   59.19
  -2   1   0 1018.75   57.49
  -2   1   0 1051.75   61.04
   2  -1   0 1024.76   58.82
   0  -4   0  184.04   12.55
   0   4   0  202.71   16.25
   0  -4   0  181.09   13.01
   0   4   0  197.44   25.64
   0  -4   0  207.74   26.98
   0   4   0  202.30   12.02
   0   4   0  192.09    7.06
   2   0  -1  102.86    5.42
   2   0  -1  108.30    6.89
   2   0  -1  109.78    6.35
  -2   0   1  105.81    5.65
  -2   0   1  108.36    6.36
  -2   0   1  111.77    4.67
   2   0  -1  125.42    6.33
  -2   0   1   98.72    6.50
   2   0  -1  103.27    7.47
   2  -1  -1   29.97    1.94
   2  -1  -1   31.53    3.15
  -2   1   1   33.48    3.37
   2  -1  -1   30.80    3.29
   2  -1  -1   32.15    3.48
  -2   1   1   32.24    4.13
  -2   1   1   33.50    1.82
  -2   1   1   32.02    3.42
   1   2  -3  398.78   18.47
  -1  -2   3  415.42   21.17
  -1  -2   3  425.40   21.87
   1   2  -3  424.03   19.41
  -1  -2   3  419.12   25.35
  -1  -2   3  434.62   20.37
  -1  -2   3  395.03   23.78
   1   2  -3  436.74   19.33
  -1  -2   3  400.16   19.38
   2  -1   1 1170.96   66.61
  -2   1  -1 1138.66   61.90
   2  -1   1 1136.91   61.18
   2  -1   1 1210.69   71.82
  -2   1  -1 1065.13   61.49
  -2   1  -1 1103.49   63.50
  -2   1  -1 1146.27   67.64
   2  -1   1 1128.25   66.54
  -2   0  -1  269.38   11.31
   2   0   1  277.19   11.37
  -2   0  -1  272.52   11.02
   2   0   1  262.84   13.05
   2   0   1  257.22   10.07
  -2   0  -1  273.44   13.51
   2   0   1  258.42   12.61
  -2   0  -1  254.39   12.51
   0  -3   3   19.74    2.06
   0  -3   3   20.25    4.64
   0   3  -3   19.24    2.35
   0  -3   3   21.77    2.70
   0   3  -3   19.21    1.13
   0   3  -3   18.69    2.96
   0   3  -3   20.83    3.53
   0  -3   3   10.05    5.21
   0   4  -1  269.32   15.47
   0   4  -1  244.35    9.88
   0  -4   1  224.41    9.48
   0  -4   1  210.29   14.18
   0   4  -1  248.07   16.27
   0  -4   1  247.67   15.69
   0   4  -1  259.64   23.63
   0   4  -1  229.37    8.97
   0  -4   1  252.58   30.86
   0   4   1  686.65   69.47
   0   4   1  745.20   40.92
   0  -4  -1  577.10   34.35
   0  -4  -1  643.33   36.69
   0   4   1  690.55   28.22
   0   4   1  710.80   41.27
   0  -4  -1  650.55   26.10
  -1  -2  -3  294.05   12.99
  -1  -2  -3  291.72   13.54
   1   2   3  289.21   12.79
   1   2   3  335.00   13.62
   0  -3  -3   94.55    4.01
   0   3   3  104.81    3.76
   0   3   3  102.44    4.97
   0   3   3  119.62    7.16
   0  -3  -3  105.89    6.12
   0   3   3  125.52   20.20
   0   3   3  109.84    3.03
  -2  -1   0  585.38   27.12
   2   1   0  620.32   32.16
   2   1   0  572.58   29.89
  -2  -1   0  587.96   30.46
   2   1   0  576.91   27.04
  -2  -1   0  589.89   30.28
   1   3  -2  471.01   24.83
  -1  -3   2  456.64   31.17
  -1  -3   2  495.17   28.83
   1   3  -2  504.21   29.62
   1   3  -2  478.60   22.09
   1   3  -2  473.98   22.21
   1   3  -2  468.56   21.65
  -1  -3   2  444.14   20.61
   2  -2   0  991.08   57.03
  -2   2   0  934.21   55.25
  -2   2   0  960.97   48.25
  -2   2   0  947.02   55.00
  -2   2   0  894.98   53.28
   2  -2   0  980.96   56.33
   2  -2   0  855.76   70.89
   2  -2   0  966.98   55.52
   2  -2   0  939.41   46.86
   0   2  -4  620.86   30.72
   0   2  -4  617.77   29.83
   0  -2   4  657.02   30.99
   0   2  -4  642.37   33.60
   0  -2   4  596.34   29.66
   0  -2   4  651.44   26.00
   0  -2   4  598.25   38.54
   0  -2   4  664.83   48.32
   1  -4   0 1162.78   58.56
  -1   4   0 1161.21   72.75
   1  -4   0 1221.97   61.19
   1  -4   0 1170.60  115.35
  -1   4   0 1333.78   91.40
   1  -4   0 1183.37   77.03
  -1   4   0 1372.62   86.98
  -1   4   0 1214.83  102.26
  -1   0   4  526.98   23.46
  -1   0   4  534.00   26.88
   1   0  -4  568.90   23.63
  -1   0   4  536.80   26.14
  -1   0   4  556.35   29.56
   1   0  -4  550.18   25.05
   1   0  -4  550.57   29.41
   1   3   2  212.73    9.38
  -1  -3  -2  220.31   11.29
   1   3   2  231.68   11.82
  -1  -3  -2  217.84    7.45
  -1  -3  -2  235.47    8.88
   1   3   2  227.65    9.09
   1   0   4  611.34   27.97
  -1   0  -4  660.22   28.12
   1   0   4  579.05   29.24
   1   0   4  572.16   32.36
   1   0   4  611.24   29.41
  -2  -1   1  209.59   11.45
  -2  -1   1  231.34    9.63
   2   1  -1  228.45   11.80
   2   1  -1  215.40   11.72
  -2  -1   1  217.29   10.84
  -2  -1   1  210.31   11.01
   2   1  -1  221.97    9.98
  -2   2  -1  102.06    6.73
   2  -2   1  101.62   13.81
   2  -2   1   98.81    4.21
  -2   2  -1  101.19    7.15
   2  -2   1  124.62    7.63
   2  -2   1  108.73    6.18
  -2   2  -1   99.76    5.25
   2  -2   1  103.29    5.34
  -2   2  -1  112.73    4.85
  -2   2   1 1006.23   50.42
   2  -2  -1  938.59   77.73
   2  -2  -1 1061.51   61.24
  -2   2   1  993.26   58.27
  -2   2   1 1014.11   60.63
   2  -2  -1 1069.62   64.81
   2  -2  -1 1006.31   59.35
   2  -2  -1  978.76   50.80
  -2   2   1  956.41   57.01
  -2  -1  -1  729.93   38.91
   2   1   1  783.07   41.38
   2   1   1  716.39   35.27
  -2  -1  -1  786.45   34.18
  -2  -1  -1  770.72   41.02
   2   1   1  700.60   37.95
  -2  -1  -1  710.40   30.88
  -2  -1  -1  703.50   34.94
  -1   1  -4  451.99   19.63
   0   2   4 1630.24  101.55
  -1   1  -4  460.66   20.66
   1  -1   4  417.38   24.53
   0  -2  -4 1974.28  128.63
   1  -1   4  419.07   20.31
   0   2   4 1931.71  125.25
   0   2   4 1868.79  116.27
   1  -1   4  457.45   21.55
   1  -1   4  407.30   15.93
  -1   4  -1 1373.69   81.82
   1  -4   1 1399.35   89.11
   1  -4   1 1249.67   68.12
  -1   1   4  224.65   22.52
  -1   4  -1 1540.68  101.49
   1  -4   1 1217.64   69.32
  -1   4  -1 1365.63   98.06
  -1   1   4  205.90   11.55
  -1   4  -1 1317.91  110.32
   1  -4   1 1257.99   87.04
  -1   1   4  215.95   11.85
   1  -1  -4  215.95   12.17
   1  -4   1 1302.24  124.39
   1  -1  -4  228.54    9.00
  -1   1   4  203.31    7.69
  -1   1   4  223.81    9.40
   1  -1  -4  236.71    7.57
  -1   4   1    9.05    2.52
  -1   4   1    9.02    6.19
  -1   4   1   12.66    3.22
  -1   4   1   11.17    1.50
   1  -4  -1    7.29    7.71
   1  -4  -1   10.26    2.42
  -1   4   1    6.71    1.59
  -2   0   2 1164.89   71.98
   2   0  -2 1266.99   72.09
  -2   0   2 1191.58   65.82
   2   0  -2 1208.75   71.76
   2   0  -2 1201.50   73.41
  -2   0   2 1140.42   68.37
   2   0  -2 1209.28   75.12
  -2   0   2 1141.03   67.74
   2  -1  -2   56.22    3.24
   2  -1  -2   62.06    7.04
   2  -1  -2   56.82    5.24
  -2   1   2   55.35    4.04
   2  -1  -2   61.57    5.35
  -2   1   2   56.49    4.54
  -2   1   2   56.38    4.94
  -2   1   2   52.28    2.48
   2  -1  -2   54.94    4.57
   1  -3   3  614.23   29.93
  -1   3  -3  733.53   39.08
  -1   3  -3  666.78   40.72
  -1   3  -3  620.51   33.43
   1  -3   3  577.15   38.40
   1  -3   3  637.65   36.52
   1  -3   3  664.98   54.10
   2  -1   2  856.92   42.76
   0  -4   2   85.11    8.85
  -2   1  -2  785.83   41.17
   2  -1   2  825.02   42.70
   2  -1   2  835.62   45.87
   0   4  -2  103.46    8.81
  -2   1  -2  829.35   45.53
   0  -4   2   76.46    7.01
   0  -4   2   90.31    5.48
   2  -1   2  805.92   41.52
   0  -4   2   79.01   15.90
   0   4  -2   96.55    7.76
   0   4  -2   86.49   12.80
   0   4  -2   89.96    4.40
  -2   1  -2  820.75   41.96
   2   0   2  304.59   10.95
   2   0   2  326.70   13.97
  -2   0  -2  322.13   14.42
   2   0   2  313.68   15.34
  -2   0  -2  324.67   15.81
   2   0   2  313.76   14.62
  -2   0  -2  342.49   15.33
  -1  -1   4   96.37    5.13
   1   1  -4   96.60    5.05
  -1  -1   4   98.05    5.92
  -1  -1   4  104.55    5.33
   1   1  -4   97.35    4.53
   1   1  -4  106.49    5.97
  -1  -1   4   99.45    6.70
  -1  -1   4   91.71    7.08
  -1  -1   4   95.72    5.89
  -1   3   3  326.27   34.37
  -1   3   3  351.49   16.78
  -1   3   3  264.00   18.51
  -1   3   3  305.51   14.29
   1  -3  -3  302.97   16.19
  -1   3   3  316.95   16.84
   0   4   2  767.18   79.21
   0   4   2  774.99   42.00
   0  -4  -2  727.10   38.36
   0   4   2  752.00   31.30
   0  -4  -2  668.31   38.48
   0   4   2  787.02   44.60
   0  -4  -2  746.44   31.61
  -1  -1  -4  103.33    4.05
   1   1   4  107.03    5.73
   1   1   4  101.16    6.48
   1   1   4  103.27    3.90
   1   1   4  104.61    4.10
   1   1   4  110.06    4.86
  -2  -1   2 1153.66   70.34
  -2  -1   2 1212.76   68.38
  -2  -1   2 1213.49   74.37
   2   1  -2 1221.50   71.91
  -2  -1   2 1202.54   74.74
   2   1  -2 1303.44   79.75
   2   1  -2 1228.72   74.03
  -1   2  -4  545.21   27.37
   1  -2   4  456.97   35.10
   1  -2   4  470.25   23.24
   1  -2   4  500.49   25.57
  -1   2  -4  475.00   21.94
  -1   2  -4  462.04   24.33
   1  -2   4  448.88   29.53
   2  -2   2   37.87    2.63
  -2   2  -2   41.09    4.52
   2  -2   2   31.42    7.98
   2  -2   2   37.96    2.51
  -2   2  -2   35.41    3.12
  -2   2  -2   38.37    4.83
   2  -2   2   36.24    2.96
   2  -2   2   35.59    3.12
  -1   4  -2  182.73   11.83
   1  -4   2  157.99   20.97
   1  -4   2  148.24    6.06
  -1   4  -2  163.78    5.55
  -1   4  -2  158.55   17.13
  -1   4  -2  164.33   13.65
   1  -4   2  153.92   12.38
  -2   2   2   59.46    4.19
   2  -2  -2   60.38    5.31
  -2   2   2   58.55    5.17
  -2   2   2   62.89    5.46
   2  -2  -2   63.98    5.62
   2  -2  -2   59.18    3.37
  -2   2   2   52.34    2.54
   2  -2  -2   67.08    6.24
   2   1   2   20.96    1.97
  -2  -1  -2   18.21    2.37
  -2  -1  -2   19.09    2.09
   2   1   2   17.98    3.26
   2   1   2   18.66    2.38
  -1   2   4 1596.31  136.47
  -1   2   4 1542.84  109.03
  -1   2   4 1465.89   85.89
  -1   2   4 1730.16  102.92
  -1   2   4 1630.38   95.86
   1  -2  -4 1646.10  108.73
  -1   2   4 1582.05  105.30
   1  -2  -4 1696.59   99.22
  -2  -2   0  766.99   43.06
   2   2   0  767.97   42.99
  -2  -2   0  770.76   40.06
  -2  -2   0  736.66   36.97
  -2  -2   0  797.71   44.48
  -2  -2   0  768.26   36.43
   2   2   0  784.17   39.77
   2   2   0  779.83   43.12
  -2   3   0   54.06    4.91
  -2   3   0   55.74    3.78
   2  -3   0   50.66    2.54
  -2   3   0   53.75    7.75
  -2   3   0   55.17    3.81
  -2   3   0   64.54    3.35
   2  -3   0   55.47    9.95
   2  -3   0   52.27    4.98
  -1   4   2  230.66   13.68
   1  -4  -2  195.53   17.21
  -1   4   2  189.14   23.75
  -1   4   2  156.23    9.98
   1  -4  -2  219.90   12.67
  -1   4   2  221.84   12.00
  -1   4   2  190.46   10.39
   1   4   0  414.41   21.12
   1   4   0  387.88   21.92
   1   4   0  408.73   19.69
  -1  -4   0  386.18   16.86
   1   4   0  407.16   22.27
   1   4   0  401.74   39.75
  -1  -4   0  402.61   25.78
  -1  -4   0  374.01   19.57
  -1  -3   3 2403.86  180.21
  -1  -3   3 2372.02  190.78
  -1  -3   3 2412.97  169.77
  -1  -3   3 2247.09  196.27
   1   3  -3 2557.04  188.69
  -1  -3   3 2420.18  191.47
   1   3  -3 2595.79  184.04
  -1  -3   3 2420.49  174.12
   0   0   5  869.09   44.94
   0   0   5  819.44   43.99
   0   0  -5  874.52   46.78
   0   0   5  807.40   45.77
   0   0   5  823.72   47.50
  -2  -2   1   30.77    3.67
  -2  -2   1   30.96    3.60
  -2  -2   1   33.07    2.44
   2   2  -1   31.92    3.02
   2   2  -1   39.61    6.91
  -2  -2   1   32.46    3.56
   2   2  -1   31.01    3.70
   2   2  -1   31.71    3.46
  -2  -2   1   32.05    2.44
  -2   3  -1    5.15    0.96
  -2   3  -1    4.27    1.25
   2  -3   1    1.64    0.76
  -2   3  -1    5.14    1.68
   2  -3   1    1.31    3.77
   2  -3   1    1.27    1.65
   2  -3   1    2.40    0.70
  -2   3  -1    3.67    2.09
   1   4  -1  365.94   37.74
   1   4  -1  359.62   18.94
  -1  -4   1  356.24   23.84
  -1  -4   1  331.72   14.13
   1   4  -1  355.88   20.58
  -1  -4   1  353.66   24.18
   1   4  -1  350.80   17.46
   1   4  -1  370.58   18.38
  -2  -2  -1 1317.60   85.05
   2   2   1 1288.31   79.76
   2   2   1 1307.26   74.96
  -2  -2  -1 1295.88   74.95
   2   2   1 1255.40   78.41
  -2   3   1    9.45    2.51
  -2   3   1    5.64    1.90
  -2   3   1    7.27    1.89
  -2   3   1    3.78    3.09
   2  -3  -1    7.14    2.29
   2  -3  -1    2.43    5.13
  -2   3   1    4.02    1.40
  -1  -2   4    1.39    1.22
  -1  -2   4    1.37    2.10
  -1  -2   4    3.57    1.60
   1   2  -4    3.08    0.92
  -1  -2   4    1.86    2.04
  -1  -2   4    3.11    2.18
   1   2  -4    2.29    0.99
   1   2  -4    3.57    1.19
  -1  -2   4    3.07    1.39
   0  -3   4   27.53    2.79
   0   3  -4   30.30    3.14
   0  -3   4   34.10    6.39
   0  -3   4   31.21    6.11
   0   3  -4   28.93    4.13
   0  -3   4   36.58    2.73
   0   3  -4   29.67    3.23
   1   3   3  132.67    5.50
  -1  -3  -3  120.01    6.07
   1   3   3  138.05    5.77
  -1  -3  -3  131.70    3.85
   1   3   3  138.29    5.98
  -1  -3  -3  150.49    9.49
   1   4   1  142.62    6.80
  -1  -4  -1  142.51    5.35
  -1  -4  -1  137.02   10.77
  -1  -4  -1  145.94    6.49
   1   4   1  135.93    8.75
   1   4   1  139.35    8.61
   1   4   1  150.86   24.53
   1   4   1  145.73    8.67
   0   1  -5 1432.40   88.80
   0  -1   5 1373.06   82.08
   0   1  -5 1408.28   75.08
   0  -1   5 1400.82   87.02
   0  -1   5 1318.10   91.61
   0   1  -5 1338.03   71.04
   0  -1   5 1414.18   80.15
  -2   0   3 3068.60  252.48
   2   0  -3 3005.10  237.44
   2   0  -3 3111.53  253.60
   2   0  -3 2959.56  245.25
  -2   0   3 2931.70  239.71
  -2   0   3 3061.60  235.23
  -2   0   3 2875.52  229.69
   2   0  -3 3176.29  248.81
   0  -4   3  281.90   13.27
   0   1   5  487.23   25.06
   0   1   5  522.08   23.71
   0  -4   3  259.44   15.94
   0   4  -3  307.41   18.44
   0   1   5  552.38   26.29
   0  -4   3  255.73   35.81
   0   4  -3  286.15   13.72
   0   1   5  505.14   24.16
   0  -4   3  285.83   21.35
   0   4  -3  288.29   16.68
   0   1   5  537.02   26.56
   0   4  -3  265.48    9.63
  -2   1   3  107.80    5.02
   2  -1  -3  103.75    8.25
  -2   1   3   98.85    5.40
   2  -1  -3  112.78    5.78
  -2   1   3  100.19    7.55
   2  -1  -3   98.15    7.21
  -2   1   3   93.86    7.28
   2  -1  -3  104.27    5.89
   1   2   4   50.12    2.10
   1   2   4   51.06    3.13
   1   2   4   47.95    2.61
  -1  -2  -4   47.44    3.15
   1   2   4   48.13    2.49
   1   2   4   59.98    2.77
   2  -1   3  174.97   11.14
  -2   1  -3  175.48    9.22
  -2   1  -3  217.28    9.56
   2  -1   3  163.81    7.27
   2  -1   3  172.75    7.49
   2  -1   3  180.21    8.40
   0   3   4   18.33    8.80
   0   3   4   23.23    2.24
   2   0   3  916.15   49.25
   2   0   3  871.86   48.39
  -2   0  -3  886.07   40.84
   2   0   3  945.76   49.67
  -2   0  -3  924.07   51.79
  -2   0  -3  905.19   49.41
   0   3   4   19.48    1.60
   2   0   3  889.65   40.57
   0   3   4   21.77    1.49
   0  -3  -4   20.83    2.73
   0  -4  -3  807.12   45.51
   0  -4  -3  959.18   52.61
   0   4   3  949.48   42.43
   0   4   3 1022.49   61.49
   0   4   3  978.30   55.35
   0   4   3  970.45   44.53
   0   4   3 1063.78  107.14
  -2  -2   2   55.41    4.64
  -2  -2   2   55.74    4.80
  -2  -2   2   58.93    5.25
   2   2  -2   57.19    4.58
   2   2  -2   56.58    4.69
  -2  -2   2   54.77    4.72
  -2  -2   2   50.24    3.40
   2   2  -2   55.23    4.56
  -1  -4   2   98.67    9.06
   1   4  -2   97.92   10.83
  -1  -4   2   92.73    4.64
   1   4  -2   98.94    5.27
  -1  -4   2   90.03    9.72
   1   4  -2   90.03    7.49
   1   4  -2   90.72    5.42
   1   4  -2  115.16    7.55
   0   5   0  507.16   20.70
   0   5   0  544.06   38.18
   0   5   0  487.57   49.03
   0   5   0  490.90   28.55
   0  -5   0  427.21   46.29
   0  -5   0  474.31   27.88
   0  -5   0  463.04   29.32
  -2   3  -2  497.91   24.45
  -2   3  -2  555.46   39.43
   2  -3   2  532.21   26.11
  -2   3  -2  508.52   26.60
   2  -3   2  511.98   23.74
  -2   3  -2  497.32   28.09
   2  -3   2  497.02   32.38
   2  -3   2  500.24   46.02
  -2  -1   3   25.97    3.13
  -2  -1   3   23.62    2.18
   2   1  -3   24.11    2.83
  -2  -1   3   18.96    2.99
   2   1  -3   23.14    3.25
  -2  -1   3   20.75    3.04
  -2  -1   3   21.41    2.70
   2   1  -3   21.44    2.59
   1  -3   4   17.65    3.04
  -1   3  -4    8.66    2.43
   1  -3   4   10.88    1.82
  -1   3  -4   12.47    2.80
  -1   3  -4   12.00    2.07
   1  -3   4   16.14    6.42
   1  -3   4   11.16    3.96
  -2   3   2  519.28   20.07
  -2   3   2  424.75   21.45
   2  -3  -2  453.31   19.09
  -2   3   2  428.52   25.32
   2  -3  -2  478.88   27.59
   2  -3  -2  430.53   40.76
  -2   3   2  414.22   32.20
  -2   3   2  512.17   30.24
  -2   3   2  457.99   26.73
   2   2   2  391.87   20.10
  -2  -2  -2  373.96   18.83
   2   2   2  350.42   17.66
   2   2   2  361.22   16.12
  -2  -2  -2  346.70   16.31
   1  -4   3  356.68   20.48
  -1   4  -3  388.35   25.57
   1  -4   3  321.24   34.03
  -1   4  -3  401.89   24.60
   1  -4   3  338.38   24.49
  -1   4  -3  354.13   17.55
   1  -4   3  351.32   15.83
  -2   2  -3  117.28    9.72
  -2   2  -3  123.77    7.31
   2  -2   3  153.44   15.81
   2  -2   3  136.03    5.80
   2  -2   3  132.30    9.40
   2  -2   3  114.52    6.22
   2  -2   3  117.95    7.09
   0  -5   1  306.85   12.63
   0   5  -1  284.25   14.50
   0   5  -1  318.71   40.32
   0  -5   1  293.13   19.30
   0   5  -1  341.90   13.78
   0  -5   1  300.07   20.30
   0   5  -1  318.37   18.74
   0   5  -1  347.93   22.10
   0  -5   1  302.06   39.43
  -2   2   3    1.03    1.54
  -2   2   3    1.11    0.95
   2  -2  -3    1.03    0.72
  -2   2   3    1.46    1.60
  -2   2   3    1.54    1.44
   2  -2  -3    0.65    1.47
   2  -2  -3    0.26    1.01
  -2   2   3    2.01    0.59
   0  -2   5   17.28    2.95
   0  -2   5   14.53    2.34
   0  -2   5   18.55    4.87
   0  -2   5   18.22    1.05
   0  -2   5   20.00    1.53
   0   2  -5   17.30    2.84
   0  -2   5   15.76    4.48
   1   4   2    0.39    4.54
   1   4   2   -0.38    1.41
  -1  -4  -2    0.75    0.66
   1   4   2    0.84    1.06
  -1  -4  -2    1.48    1.49
   1   4   2    0.71    1.36
   1   4   2    1.69    0.75
   2   1   3  197.71    8.59
   2   1   3  169.67   10.12
  -2  -1  -3  194.17    9.23
  -2  -1  -3  164.76    8.36
   2   1   3  149.74   10.42
   1   0  -5  534.36   25.18
  -1   0   5  498.70   25.59
  -1   0   5  529.82   29.75
  -1   0   5  424.80   19.39
  -1   0   5  481.65   24.52
   1   0  -5  532.65   20.54
  -1   0   5  507.48   30.89
  -1   3   4  221.21   11.35
  -1   3   4  230.00    7.36
  -1   3   4  240.60    7.51
  -1   3   4  201.68   15.85
  -1   3   4  208.87   28.49
   1  -3  -4  215.63   12.36
  -1   3   4  216.18    9.10
  -1   3   4  217.37   12.50
   0   5   1   85.63   20.03
   0   5   1   86.40    7.85
   0  -5  -1   74.88    6.67
   0   5   1   78.47    6.19
   0  -5  -1   75.73    5.63
   0   5   1   73.98    2.53
  -1   0  -5  365.09   13.25
   1   0   5  336.00   20.71
   1   0   5  244.10   13.60
  -1   0  -5  326.60   11.50
   1   0   5  322.95   15.52
   1   0   5  326.30   13.53
  -1   4   3    1.57    4.46
  -1   4   3    0.46    1.19
  -1   4   3    0.68    1.25
  -1   4   3    0.65    1.59
   1  -4  -3    3.06    1.31
  -1   4   3    0.35    2.03
  -1   5   0   41.76   12.47
   1  -5   0   34.83    4.78
  -1   5   0   51.26    7.37
  -1   5   0   41.42    4.51
   1  -5   0   47.33    1.40
   1  -5   0   44.09    1.53
   1  -5   0   55.04   22.06
  -1   5   0   44.57    6.14
   1  -5   0   44.15    5.54
  -1   1  -5   69.93    3.29
   1  -1   5   64.30    4.85
   1  -1   5   57.07    4.80
   1  -1   5   65.63    9.29
   1  -1   5   76.87    5.46
   1  -1   5   83.25    3.08
  -1   1  -5   91.92    4.48
   0   2   5  715.57   37.73
   0   2   5  809.22   38.52
  -1   1   5  517.32   45.90
  -1   1   5  478.03   26.55
   1  -1  -5  510.95   23.66
  -1   1   5  469.96   26.61
   0   2   5  706.22   34.61
   1  -1  -5  494.64   28.16
  -1   1   5  479.05   24.87
   0  -2  -5  734.07   39.45
   1  -5   1  242.59   16.04
  -1   5  -1  277.59   14.68
  -1   5  -1  292.32   19.47
   1  -5   1  247.57   35.95
  -1   5  -1  281.84   30.67
   1  -5   1  274.39   18.68
   1  -5   1  232.76    9.18
  -1   5  -1  295.11   21.72
  -1  -1   5  287.94   13.25
  -1  -1   5  256.95   13.48
  -1  -1   5  260.15   14.71
  -1  -1   5  251.18   16.31
  -1  -1   5  255.81   13.59
   1   1  -5  259.46   12.47
   1   1  -5  264.75   10.55
  -1  -1   5  247.53   13.26
  -2  -3   0  304.88   15.88
   2   3   0  343.78   19.05
  -2  -3   0  285.63   13.01
  -2  -3   0  300.97   12.62
   2   3   0  325.67   17.98
   2   3   0  357.04   36.65
  -2  -3   0  328.68   18.73
   2   3   0  307.69   14.64
  -1   5   1  267.82   32.21
  -1   5   1  261.50   18.45
   1  -5  -1  241.24   15.25
  -1   5   1  262.57   17.41
   1  -5  -1  258.31   37.03
  -2   4   0    1.66    1.39
  -2   4   0    3.72    1.51
  -2   4   0    2.51    2.47
   2  -4   0    5.20    2.08
   2  -4   0   11.08    5.29
  -2   4   0    2.14    1.97
   1   3  -4 1295.49   75.91
  -1  -3   4 1200.39   71.83
  -1  -3   4 1152.47   78.58
  -1  -3   4 1185.58   76.58
  -1  -3   4 1028.64   83.33
  -1  -3   4 1115.52   65.39
   1   3  -4 1272.88   74.75
   1   3  -4 1225.56   72.99
  -1  -3   4 1205.32   85.38
   1   1   5  316.20   18.01
   1   1   5  365.04   16.02
  -1  -1  -5  315.09   11.16
   1   1   5  343.46   14.25
   1   1   5  338.79   18.02
  -1  -1  -5  323.40   10.57
   0   5  -2 1941.73  167.89
   0   5  -2 1881.24  124.38
   0  -5   2 1664.86  130.95
   0   5  -2 1919.42  144.42
   0   5  -2 1843.52  135.79
   0  -5   2 1670.24  107.44
   0  -5   2 1668.16  187.90
   0  -5   2 1668.62  127.53
   2   3  -1  248.03   14.11
  -2  -3   1  232.33   11.56
  -2  -3   1  221.65   14.68
   2   3  -1  229.95   11.90
  -2  -3   1  210.59    9.84
  -2  -3   1  229.07   13.95
   2   3  -1  230.78   12.88
   2   3  -1  240.70   24.10
  -2   4  -1  241.17   12.29
   2  -4   1  259.17   10.51
   2  -4   1  241.07   15.76
  -2   4  -1  261.20   14.59
  -2   4  -1  230.54   14.89
  -2   4  -1  256.57   18.94
   2  -4   1  217.30   27.45
   2  -4   1  237.36    9.29
  -2  -3  -1  264.74   15.21
   2   3   1  275.02   12.55
   2   3   1  286.70   16.28
   2   3   1  285.58   15.63
  -2  -3  -1  280.61   12.58
   2  -4  -1   70.75    2.52
  -2   4   1   76.66    5.71
  -2   4   1   75.83    8.39
  -2   4   1   73.60    5.28
   2  -4  -1   82.19    7.45
  -2   4   1   74.53    6.12
  -2   4   1   66.91   10.96
   2  -4  -1   70.41    2.31
   2  -4  -1   69.49   21.62
   1  -2   5 1436.28   91.48
   1  -2   5 1409.41  112.87
   1  -2   5 1681.91  109.01
  -1   2  -5 1542.63  102.55
   1  -2   5 1415.19  107.94
  -1   2  -5 1530.97   94.04
  -1   2  -5 1524.08   99.45
   0   5   2   20.46    3.59
   0   5   2   17.04   11.71
   0  -5  -2   16.59    3.22
   0   5   2   17.09    3.55
   0  -5  -2   10.94    3.19
  -2  -2   3    2.01    1.37
   2   2  -3    1.85    1.37
   2   2  -3    0.81    1.23
   2   2  -3    1.03    1.34
  -2  -2   3    1.56    1.32
  -2  -2   3    1.69    1.03
  -2  -2   3    1.35    1.59
  -2  -2   3    2.85    1.28
  -1  -4   3   37.26    6.25
  -1  -4   3   26.21    6.75
  -1  -4   3   37.58    3.04
   1   4  -3   31.84    2.57
   1   4  -3   30.61    6.05
   1   4  -3   33.59    4.10
  -1  -4   3   32.44    5.85
   1   4  -3   36.81    3.18
   1   3   4  367.61   14.12
   1   3   4  409.03   16.26
  -1  -3  -4  357.34   16.61
   1   3   4  392.80   16.35
   1   3   4  404.34   18.02
  -1  -3  -4  426.14   20.47
  -2   3  -3 1305.70   84.04
  -2   3  -3 1308.27   83.41
   2  -3   3 1161.35   81.07
   2  -3   3 1362.47   81.13
   1  -2  -5    4.76    1.75
   1  -2  -5    5.04    1.14
  -2   3  -3 1265.94   87.87
  -1   2   5    1.72    1.99
  -1   2   5    3.79    4.51
  -1   2   5    2.20    1.09
   2  -3   3 1275.73  116.38
   2  -3   3 1262.68   78.16
   0   4  -4  512.60   29.34
   0  -4   4  560.38   40.13
   0  -4   4  485.57   51.67
   0   4  -4  589.82   34.12
   0   4  -4  535.15   27.85
   0  -4   4  433.50   24.89
   0  -4   4  505.93   25.96
  -2   0   4  314.55   14.16
  -2   0   4  308.60   18.14
   2   0  -4  325.71   22.82
   2   0  -4  318.53   16.15
   2   0  -4  313.13   19.15
   2   0  -4  306.08   15.90
  -2   0   4  299.59   17.53
  -2   0   4  300.77   14.67
  -1   5  -2  301.20   13.21
  -1   5  -2  347.66   24.74
  -1   5  -2  319.20   30.44
  -1   5  -2  355.26   24.27
   1  -5   2  306.82   40.84
   1  -5   2  308.28   16.35
   1  -5   2  307.19   19.19
   1  -5   2  309.37   13.82
   1  -5   2  307.57   21.97
  -2   1   4   40.94    3.59
  -2   1   4   38.54    6.05
   2  -1  -4   43.08    2.56
   2  -1  -4   42.90    5.12
  -2   1   4   44.25    2.51
  -2   1   4   42.41    5.21
   2  -1  -4   44.78    3.72
  -2   3   3 1427.60   97.08
  -2   3   3 1379.51   74.24
   2  -3  -3 1290.26   72.60
  -2   3   3 1268.69   80.78
  -2   3   3 1383.02   87.75
  -2   3   3 1201.54  104.55
   2  -3  -3 1550.72  108.72
  -2   3   3 1318.33   94.20
   2  -1   4  115.88    5.67
   2  -1   4  115.89    6.73
   2  -1   4  105.44    6.11
  -2   1  -4  104.98    5.44
  -2   1  -4  118.84    6.26
   2  -1   4  108.49    7.31
   2   2   3 3863.79  320.09
  -2  -2  -3 3469.81  294.93
   2   2   3 3342.60  292.45
  -2  -2  -3 3956.25  337.97
   2   2   3 3911.14  337.31
   2   0   4  777.07   38.71
   2   0   4  719.55   37.97
   2   0   4  635.20   27.06
   2   0   4  702.32   36.30
  -2   0  -4  723.95   36.53
   2   0   4  639.71   27.11
  -1   5   2  223.45   14.27
  -1   5   2  254.82   19.42
   1  -5  -2  252.40   15.18
  -1   5   2  274.32   18.68
  -1   5   2  251.33   32.85
  -1  -2   5   82.82    8.59
  -1  -2   5   53.67    6.84
   1   2  -5   80.97    5.15
   1   2  -5   76.25    3.55
  -1  -2   5   64.00    3.80
  -1  -2   5   72.93    5.54
  -1  -2   5   68.44    6.78
   1   2  -5   75.75    3.62
  -1  -2   5   70.71    6.31
   1   4   3  789.65   79.34
   1   4   3  720.63   37.03
  -1  -4  -3  615.61   28.01
  -1  -4  -3  669.12   43.85
   1   4   3  723.32   33.87
   1   4   3  688.83   34.33
  -1  -4  -3  670.31   33.08
   0  -3   5   10.34    4.44
   0   3  -5   17.53    2.60
   0   3  -5   10.52    1.71
   0  -3   5   10.37    4.73
   0  -3   5    7.67    1.81
   0  -3   5   11.71    2.10
  -2  -3   2  472.81   28.23
   2   3  -2  501.19   28.13
   2   3  -2  463.60   27.45
  -2  -3   2  488.04   29.54
   2   3  -2  483.48   26.21
  -2  -3   2  472.65   24.66
  -2  -3   2  470.11   25.87
  -2  -3   2  465.43   22.74
   2   3  -2  506.12   26.85
   0   4   4   80.31    2.67
   0   4   4   75.59    2.22
   0   4   4   92.71    5.66
   0  -4  -4   67.60    3.68
   0  -4  -4   81.99    4.71
   0   4   4   97.20   21.54
   0   4   4   78.14    4.28
   2  -4   2  326.14   21.23
   2  -4   2  329.72   36.24
   2  -4   2  338.01   16.60
  -2   4  -2  330.41   19.89
  -2   4  -2  372.49   26.17
  -2   4  -2  333.00   13.96
   2  -4   2  287.23   13.57
  -2   4  -2  358.59   19.98
   2   1  -4   23.11    2.45
   2   1  -4   23.05    2.62
   2   1  -4   22.60    3.64
  -2  -1   4   21.59    3.73
  -2  -1   4   24.99    4.03
  -2  -1   4   24.03    4.33
  -2  -1   4   23.05    2.38
  -2  -1   4   22.06    3.51
  -1  -5   0  517.47   23.18
   1   5   0  555.95   28.08
  -1  -5   0  517.25   36.84
  -1  -5   0  529.55   29.68
   1   5   0  507.22   28.81
   1   5   0  542.98   33.24
   1   5   0  555.66   32.66
   1   5   0  544.52   67.91
  -2   4   2   64.39   12.19
  -2   4   2   63.47    6.31
  -2   4   2   64.49    4.69
  -2   4   2   66.21    5.45
   2  -4  -2   67.01   14.94
  -2   4   2   74.90    8.02
   2  -4  -2   64.61    6.63
   2   3   2 2065.55  151.44
  -2  -3  -2 2000.49  141.31
   2   3   2 2260.97  154.30
   2   3   2 2179.40  162.23
  -2  -3  -2 2267.77  167.23
  -1   4  -4   70.17    6.90
   1  -4   4   52.12    6.33
   1  -4   4   60.84    3.87
   1  -4   4   58.31    8.52
  -1   4  -4   62.62    7.51
  -1   4  -4   63.12    5.59
   1  -4   4   70.58   13.14
   1   2   5    6.30    1.07
   1   2   5    4.15    1.36
   1   2   5    2.56    0.86
   1   2   5    4.09    1.19
   1   2   5    5.50    0.64
  -1  -2  -5    5.48    0.97
   2  -2   4  385.89   34.44
   2  -2   4  411.40   19.87
  -2   2  -4  414.46   24.12
   2  -2   4  369.09   21.02
   2  -2   4  390.88   20.51
  -2   2  -4  369.49   17.76
   2  -2   4  356.75   14.78
  -2   2  -4  388.90   21.81
   0   3   5   27.84    1.60
   0   3   5   21.01   10.25
   0  -3  -5   25.40    2.67
   0   3   5   27.20    3.34
  -2   2   4   17.26    3.04
   2  -2  -4   10.86    1.45
  -2   2   4   11.57    1.59
   2  -2  -4   16.97    3.06
  -2   2   4   12.41    1.29
  -2   2   4   10.23    3.78
  -2   2   4   12.68    3.07
  -1  -5   1  330.01   14.23
   1   5  -1  336.53   18.54
   1   5  -1  350.39   21.42
  -1  -5   1  348.96   25.37
  -1  -5   1  353.92   26.21
   1   5  -1  350.42   32.87
   1   5  -1  373.73   16.87
   1   5  -1  360.97   22.83
   0   0   6  294.23   14.17
   0   0   6  290.68   14.69
   0   0   6  273.49   15.29
   0   0   6  303.12   18.10
   2   1   4  323.88   17.25
  -2  -1  -4  463.96   24.41
   2   1   4  287.46   15.65
   2   1   4  369.26   16.83
  -2  -1  -4  323.34   15.60
   0   5  -3 1761.80  126.51
   0  -5   3 1603.36  127.50
   0   5  -3 1738.06  115.63
   0  -5   3 1367.91  106.22
   0   5  -3 1738.00  127.56
   0  -5   3 1431.76  146.24
   0   5  -3 1713.47  102.60
   0  -5   3 1494.98   97.18
   0   5  -3 1708.77  136.47
   1   5   1 1062.70   68.44
  -1  -5  -1 1062.64   57.46
   1   5   1 1161.21  119.55
   1   5   1 1120.34   62.65
   1   5   1 1124.50   72.47
  -1  -5  -1 1155.29   67.72
   1   5   1 1166.22   73.41
  -1  -5  -1 1085.13   78.00
   0   1  -6  484.71   26.71
   0  -1   6  485.21   26.24
   0  -1   6  479.05   36.58
   0  -1   6  496.45   23.57
   0  -1   6  483.77   24.70
  -1   4   4   53.29    4.97
  -1   4   4   54.33    5.55
   1  -4  -4   52.17    4.87
  -1   4   4   55.96   15.86
  -1   4   4   46.95    3.68
  -1   4   4   37.91    6.92
   1  -3   5  120.22   13.03
   1  -3   5  117.83    6.93
   1  -3   5  164.76   19.33
  -1   3  -5  111.25    8.44
  -1   3  -5  123.46    6.63
  -1   3  -5  135.87   10.50
   1  -3   5  108.28    8.14
   0   1   6  222.55   10.98
   0   1   6  225.64   11.42
   0   1   6  212.28   12.42
   0   1   6  210.26    9.71
   0   1   6  229.57   15.68
   0   5   3  228.77   38.99
   0   5   3  236.51   13.92
   0  -5  -3  178.72   11.64
   0   5   3  223.51   13.14
   0  -5  -3  220.62   12.77
   1  -5   3   54.85    8.12
   1  -5   3   54.20    5.59
  -1   5  -3   50.79    7.82
   1  -5   3   59.42    3.36
   1  -5   3   51.14   15.61
  -1   5  -3   64.16    8.59
  -1   3   5  599.85   24.72
  -1   3   5  565.17   31.49
  -1   3   5  445.15   18.14
  -1   3   5  590.75   68.97
  -1   3   5  526.21   35.04
   1  -3  -5  559.80   31.05
  -1   3   5  461.20   20.19
  -1   3   5  561.61   23.19
   1   5  -2   41.75    4.81
  -1  -5   2   41.12    6.93
   1   5  -2   38.78    5.32
   1   5  -2   35.59    3.94
   1   5  -2   34.28    7.89
  -1  -5   2   36.61    2.62
   1   5  -2   35.08    5.05
  -1  -5   2   39.79    6.29
  -3   1   0   93.14    8.30
  -3   1   0   98.14    7.88
   3  -1   0   90.09    5.07
   3  -1   0   92.56    5.52
   3  -1   0   94.85    7.67
   3  -1   0   98.54    7.39
  -3   1   0   95.27    6.54
   3  -1   0   91.52   10.13
  -3   1   0   92.96    5.24
  -2  -3   3  239.30   13.46
   2   3  -3  265.97   14.96
  -2  -3   3  238.64   15.25
  -2  -3   3  246.56   14.10
   2   3  -3  259.73   14.82
   2   3  -3  262.87   13.88
  -2  -3   3  254.27   17.49
  -2  -3   3  244.82   12.48
   3   0   0  449.32   33.36
  -3   0   0  553.34   30.12
  -3   0   0  536.45   31.65
   3   0   0  532.71   27.91
   3   0   0  534.34   32.04
   3   0   0  552.97   32.25
  -3   0   0  521.77   33.49
  -3   0   0  598.41   29.79
   3   0   0  557.52   28.30
   1  -5  -3  257.49   15.63
  -1   5   3  274.96   19.66
  -1   5   3  271.72   38.04
  -1   5   3  242.67   13.95
  -1   5   3  276.92   18.71
  -2  -2   4  286.94   14.41
  -2  -2   4  260.55   14.92
   2   2  -4  283.17   16.23
  -2  -2   4  296.01   17.38
   2   2  -4  302.90   15.34
  -2  -2   4  270.16   15.91
   2   2  -4  279.85   14.62
  -2  -2   4  293.84   19.13
  -1  -4   4 1079.15   75.80
  -1  -4   4  932.02   84.96
  -1  -4   4 1019.97   61.52
   1   4  -4 1033.38   65.34
   1   4  -4 1063.17   62.93
  -1  -4   4 1064.33   69.85
  -1  -4   4 1056.95   79.43
   1   4  -4 1132.78   63.24
  -2   4  -3  698.58   43.19
   2  -4   3  694.58   37.33
   2  -4   3  665.71   36.52
   2  -4   3  640.25   44.78
  -2   4  -3  862.64   51.80
   2  -4   3  696.82   69.80
  -2   4  -3  709.33   49.60
   3  -1  -1   17.24    3.43
   3  -1  -1   11.17    4.59
   3  -1  -1   17.89    2.08
  -3   1   1   17.91    3.48
  -3   1   1   17.58    1.84
  -3   1   1   19.88    3.92
   3  -1  -1   17.02    3.33
  -3   1   1   16.85    3.34
   3  -1  -1   17.07    2.56
   1   5   2   70.08    5.30
   1   5   2  102.92   21.89
  -1  -5  -2   70.99    9.68
   1   5   2   76.78    6.81
  -1  -5  -2   71.68    3.63
  -1  -5  -2   63.48    3.49
   1   5   2   67.15    5.88
   1   5   2   67.82    3.29
   0   2  -6  125.67    5.26
   2   4   0   32.08    5.13
  -2  -4   0   34.08    3.72
   0  -2   6  129.53   12.39
   2   4   0   32.98   11.11
  -2  -4   0   31.09    2.63
   0   2  -6  106.16    4.50
  -2  -4   0   37.94    5.27
   0   2  -6  129.79    8.79
   0  -2   6  101.66   12.46
   2   4   0   36.26    4.64
   0  -2   6  122.25    7.53
   2   4   0   37.26    3.47
   0  -2   6  114.39    8.20
  -2  -4   0   37.95    2.67
   3  -1   1  128.68   14.34
   3  -1   1  119.79    8.02
   3  -1   1  129.07    6.26
   3  -1   1  129.01    6.61
  -3   1  -1  129.35    6.95
   3  -1   1  129.16    9.05
  -3   1  -1  130.87    9.42
  -3   1  -1  132.92    9.44
  -3   1  -1  125.44    8.67
  -2   3  -4   24.70    3.20
  -2   3  -4   36.31    4.59
   2  -3   4   36.72    3.42
   2  -3   4   28.48    4.84
   2  -3   4   24.03   11.12
   2  -3   4   34.57    3.35
   2  -5   0  157.82    5.11
   2  -5   0  162.61   12.58
  -2   5   0  172.92   12.09
  -2   5   0  152.65   10.62
   2  -5   0  134.66   28.86
  -2   5   0  187.36   17.19
  -2   5   0  141.02   19.88
   2  -5   0  142.21    4.94
  -2   5   0  158.67   12.21
  -1   0   6  489.83   29.19
  -1   0   6  528.09   29.10
   1   0  -6  518.82   26.80
  -1   0   6  469.97   25.96
  -1   0   6  508.34   31.93
  -1  -3   5  623.73   44.44
  -1  -3   5  573.48   27.95
   1   3  -5  629.44   33.70
   1   3  -5  645.68   34.08
   1   3  -5  615.32   33.53
  -1  -3   5  612.60   37.28
  -1  -3   5  601.56   33.83
  -1  -3   5  601.62   35.71
  -1  -3   5  477.68   41.16
  -3   0   1  497.84   29.43
   3   0  -1  395.62   26.54
   3   0  -1  503.85   30.79
  -3   0   1  513.64   25.01
   3   0  -1  483.11   27.55
   3   0  -1  515.21   29.58
   3   0  -1  505.64   26.14
  -3   0   1  482.95   25.47
  -3   0   1  461.02   29.41
   0  -6   0  367.47   14.58
  -2   4   3    8.57    3.01
  -2   4   3   10.98    2.43
   0  -6   0  393.50   24.12
  -2   4   3    7.25    2.01
  -2   4   3   10.10    5.36
   0   6   0  399.24   43.31
   0   6   0  433.60   18.29
   0  -6   0  327.84   22.08
   0   6   0  416.24   25.70
   2  -4  -3   10.55    3.06
  -2   4   3    9.66    3.42
   0   6   0  439.17   28.98
  -3   0  -1  106.34    7.77
   3   0   1  111.14    6.21
  -3   0  -1  116.86   10.36
   3   0   1  113.87    8.25
   3   0   1  102.65    5.28
  -3   0  -1  109.54    6.86
  -3   0  -1  119.93    6.63
   3   0   1  114.10    8.42
  -3   2   0  533.86   32.42
   3  -2   0  479.55   29.12
   3  -2   0  565.39   33.37
  -3   2   0  532.14   26.08
  -3   2   0  480.60   30.58
   3  -2   0  525.65   29.63
   3  -2   0  524.61   25.63
  -3   2   0  526.22   31.59
   3  -2   0  451.66   37.56
   2   4  -1 1385.27  125.17
   2   4  -1 1454.53   93.88
  -2  -4   1 1407.99  102.25
  -2  -4   1 1428.88  102.07
   2   4  -1 1494.92  101.20
  -2  -4   1 1411.86   86.91
  -2  -4   1 1366.28   86.48
   2   4  -1 1546.62  106.11
   2   3   3  362.85   16.33
   2   3   3  327.37   17.38
   1   0   6  453.92   32.33
  -2  -3  -3  332.46   18.89
  -2  -3  -3  369.14   17.85
   1   0   6  531.15   26.52
   2   3   3  314.07   20.24
   1   0   6  468.82   24.19
   1   0   6  497.87   26.09
   2  -3  -4  412.66   17.39
  -2   3   4  406.48   27.21
  -2   3   4  393.81   15.56
  -2   3   4  436.85   21.54
  -2   3   4  463.11   27.80
   2  -3  -4  446.57   27.26
  -2   3   4  438.22   21.12
  -2   3   4  355.49   33.05
   1  -1   6  120.50    4.83
   1  -1   6  131.48    6.05
   1  -1   6  142.62   14.89
   1  -1   6  144.92    8.43
  -1   1  -6  134.62    4.58
   1  -1   6  143.87    7.88
   1  -1   6   99.69    7.59
   2   2   4  898.74   50.81
   2   2   4 1024.68   61.24
  -2  -2  -4  988.99   55.74
   2   2   4  944.64   51.84
  -2  -2  -4  881.01   53.00
  -2   5  -1   20.61    2.71
  -2   5  -1   21.14    4.39
   2  -5   1   24.89   12.53
   2  -5   1   24.33    4.50
  -2   5  -1   23.51    4.18
  -2   5  -1   27.62    6.13
   2  -5   1   22.61    1.29
  -1   1   6  642.42   35.03
  -1   1   6  606.14   36.61
   1  -1  -6  642.50   32.66
  -1   1   6  571.68   34.69
  -1   1   6  597.49   59.21
  -1   1   6  634.77   36.18
   0   2   6  137.50    8.17
   0   2   6  149.21    8.68
   0   2   6  141.83    7.77
   0   2   6  144.03    6.52
   0   6  -1    9.46    1.71
   0   6  -1   13.36    3.48
   2   4   1 1017.10   94.03
  -2  -4  -1  844.07   46.56
   0  -6   1   12.77    1.02
   0   6  -1   15.47    4.24
   2   4   1  922.21   57.10
   0  -6   1    9.18    3.23
   0   6  -1   15.22    1.49
   2   4   1  961.50   60.92
  -2  -4  -1  967.26   62.64
   0  -6   1    8.67   10.03
   0   6  -1   12.92    7.67
   2   4   1  904.07   50.06
   0  -6   1   13.30    4.62
  -2   5   1 1906.90  198.49
   2  -5  -1 2086.09  171.13
  -2   5   1 2025.74  163.10
  -2   5   1 1997.89  159.17
  -2   5   1 2269.76  185.13
  -2   5   1 2333.40  194.53
   2  -5  -1 1944.94  229.01
   1   1  -6   12.59    1.36
  -1  -1   6   12.60    3.09
  -1  -1   6   15.35    3.16
  -1  -1   6   12.27    4.03
  -1  -1   6   18.03    2.16
  -1  -1   6   15.41    1.41
   1   1  -6   13.73    3.22
  -1  -1   6   14.38    2.84
   1   4   4 2947.47  215.01
   1   4   4 2678.20  205.91
  -1  -4  -4 3010.29  230.13
   1   4   4 2661.01  286.32
  -1  -4  -4 2750.67  224.92
  -1   6   0   65.07    9.06
  -1   6   0   53.94   15.82
   1  -6   0   64.20   19.62
   1  -6   0   41.53    5.84
  -1   6   0   52.28    5.56
  -1   6   0   61.29    7.64
   1  -6   0   47.09    5.87
  -3   2   1   51.67    5.86
  -3   2   1   57.62    3.28
   3  -2  -1   44.32   11.21
   3  -2  -1   55.29    5.73
  -3   2   1   50.33    5.62
   3  -2  -1   53.05    6.01
   3  -2  -1   51.31    3.25
  -3   2   1   48.00    5.49
   3  -2  -1   50.66    4.99
  -3   2  -1  172.86   15.18
   3  -2   1  204.81    9.34
  -3   2  -1  219.33   10.27
   3  -2   1  172.29   10.80
   3  -2   1  207.58   13.16
  -3   2  -1  206.47   13.51
  -3   2  -1  202.16   13.44
   3  -2   1  190.86   10.53
   3  -2   1  172.66   20.97
   0  -6  -1  337.54   21.83
   0   6   1  438.45   26.07
   0  -6  -1  376.18   24.28
   0   6   1  453.73   54.77
   0   6   1  435.57   28.33
   0   4  -5  116.26    7.78
   0  -4   5  103.97    6.79
   0  -4   5   79.48    5.39
   0  -4   5   88.79   13.95
   0   4  -5  100.87    6.69
   0  -4   5  113.65   13.35
   0   4  -5  125.38    9.17
   1   3   5  293.13   11.83
  -1  -3  -5  296.77   13.05
   1   3   5  269.81   12.33
   1   3   5  230.19    9.54
  -2   0   5  128.85    7.98
  -2   0   5  136.84    9.52
   2   0  -5  141.18    7.55
  -2   0   5  142.87    7.17
  -2   0   5  149.03   10.68
   2   0  -5  144.68    7.25
  -3  -1   0  699.51   42.48
   3   1   0  679.69   41.58
  -3  -1   0  653.76   40.74
  -3  -1   0  670.12   35.43
   3   1   0  693.04   42.41
  -3  -1   0  701.46   37.26
   3   1   0  726.04   39.84
  -3  -1   0  746.56   39.82
   1  -6   1   60.12    2.63
  -1   6  -1   71.93   15.77
  -1   6  -1   80.56    9.70
   1  -6   1   55.13    6.70
   1  -6   1   53.34    2.93
  -1   6  -1   65.14    5.91
   1  -6   1   65.08    9.75
  -1   6  -1   69.56    8.53
   1  -6   1   71.56   21.31
  -2   1   5   63.19    6.32
   2  -1  -5   78.09    4.89
  -2   1   5   79.62    3.97
  -2   1   5   74.70    7.72
  -2   1   5   61.99    4.62
   2  -1  -5   76.55    7.67
   1   1   6  450.47   29.54
   1   1   6  513.55   23.46
   1   1   6  562.90   27.57
   1   1   6  523.48   26.81
  -2   1  -5  101.39    5.36
   2  -1   5   92.74    4.23
   2  -1   5   97.25    7.09
   2  -1   5   95.61    6.27
  -2   1  -5  104.49    4.71
   2  -1   5   94.62    6.82
   2  -1   5  100.40    4.19
  -3   1   2  268.64   11.87
  -3   1   2  237.50   14.78
  -3   1   2  220.18   15.76
   3  -1  -2  273.04   15.89
   3  -1  -2  232.92   16.18
  -3   1   2  240.32   14.87
   3  -1  -2  259.57   13.26
   3  -1  -2  230.51   14.09
  -1   6   1    1.58    2.30
  -1   6   1    3.92    5.76
  -1   6   1    1.95    2.53
   1  -6  -1    2.44    4.47
   1  -6  -1    2.03    1.53
  -1   6   1   -0.26    1.04
  -1   6   1    0.61    1.04
  -2   0  -5  194.80    8.72
   2   0   5  191.05    9.13
   2   0   5  202.53   10.34
   2   0   5  196.07   11.92
   3  -1   2  697.16   56.07
  -3   1  -2  732.44   43.04
   3   1  -1   66.82    6.76
   3  -1   2  741.67   43.73
   3  -1   2  815.65   46.23
  -3  -1   1   67.02    6.89
  -3  -1   1   62.05    4.15
   3  -1   2  789.70   47.99
  -3   1  -2  781.43   47.74
  -3   1  -2  780.67   47.11
   3  -1   2  700.85   37.69
  -3   1  -2  776.34   46.03
   3   1  -1   64.72    4.94
   3   1  -1   66.69    8.10
  -3  -1   1   67.15    4.35
   3   1  -1   56.79    5.87
  -3  -1   1   65.24    6.26
  -3  -1   1   64.14    4.39
   0  -5   4  243.77   22.38
   0  -5   4  212.86   39.51
   0   5  -4  257.08   13.98
   0  -5   4  203.25   13.25
   0   5  -4  257.86   17.99
   0  -5   4  223.10   12.24
   0   5  -4  244.85   15.96
   3   0  -2  211.22   12.73
  -3   0   2  189.95   13.43
  -3   0   2  206.15   13.14
   3   0  -2  214.55   14.91
   3   0  -2  214.60   13.28
   3   0  -2  215.39   11.87
  -3   0   2  208.74   14.84
  -3   0   2  217.60   10.26
   2   4  -2  273.01   18.11
  -3  -1  -1 2352.30  180.42
   3   1   1 2654.26  199.61
   2   4  -2  289.70   16.42
   2   4  -2  307.71   18.96
  -2  -4   2  287.72   15.69
  -3  -1  -1 2518.04  201.96
   3   1   1 2449.17  197.99
   3   1   1 2517.35  201.77
  -2  -4   2  280.61   13.87
  -2  -4   2  301.47   20.22
  -3  -1  -1 2518.50  202.17
   2   4  -2  312.58   16.71
  -2  -4   2  275.94   19.52
   1   5  -3   75.81    4.93
  -1  -5   3   73.38    9.87
   1   5  -3   69.84    4.20
   1   5  -3   70.41    4.92
  -1  -5   3   67.82    8.49
   1   5  -3   71.27    7.24
   1   5  -3   72.25    8.64
  -1  -5   3   66.15    4.54
   1  -2   6   94.10    6.92
   1  -2   6   98.94   14.50
   1  -2   6  103.64   13.04
  -1   2  -6   94.03    4.78
   1  -2   6   93.03    6.34
  -1   2  -6   94.28    6.39
   3   0   2    6.04    1.76
  -3   0  -2   10.03    3.19
   3   0   2    9.32    2.11
   3   0   2    8.08    2.49
  -3   0  -2    7.17    1.99
  -2   5  -2   72.24    9.79
   2  -5   2   54.18    3.22
   2  -5   2   61.51    3.85
  -2   5  -2   83.94    8.09
  -2   5  -2   59.81    3.31
   2  -5   2   65.41   18.48
   2  -5   2   65.83    7.75
  -2   5  -2   61.09    6.95
   0   6  -2   26.61    3.12
   0  -6   2   21.20   12.57
   0  -6   2   20.76    1.79
   0  -6   2   24.47    5.17
   0   6  -2   27.27    5.43
   0   6  -2   34.50    9.79
   0   6  -2   28.33    4.64
   0   6  -2   22.28    2.08
   0  -6   2   22.53    4.24
   0   4   5   83.69   22.45
   0  -4  -5   72.91    4.73
   0   4   5   83.33    7.26
  -2  -1   5   92.08    8.48
  -2  -1   5   83.19    7.70
   2   1  -5   81.99    7.55
  -2  -1   5   84.32    5.32
  -2  -1   5   71.27    6.37
   2   1  -5   87.38    5.47
  -2  -1   5   72.81    5.52
   2   1  -5   84.24    4.82
   1  -2  -6   18.53    3.47
  -1   2   6   17.84    3.27
  -1   2   6    2.03    8.40
  -1   2   6   16.89    3.54
  -1   2   6   16.92    1.75
  -1   2   6   16.78    1.57
   1  -4   5 1153.38   71.59
  -1   4  -5 1289.23   82.62
  -1   4  -5 1250.05   91.30
   1  -4   5 1277.45   89.59
   1  -4   5 1130.99  106.81
  -1   4  -5 1247.71   92.83
   1  -4   5 1159.89   93.88
  -2  -4  -2  760.60   45.92
   2   4   2 1054.37   66.37
   2   4   2  995.83   54.72
  -2  -4  -2 1068.45   67.68
   2   4   2 1011.88   61.49
   2   4   2 1192.65  109.23
   2  -5  -2 1235.02  137.34
  -2   5   2 1186.15   84.49
  -2   5   2 1505.31  107.93
  -2   5   2 1127.20   85.65
  -2   5   2 1442.08  107.53
  -2   5   2 1208.55  121.31
   2  -5  -2 1268.67   92.11
  -3   2   2   45.81    5.69
   3  -3   0  343.42   21.70
   3  -2  -2   50.86    5.28
  -3   3   0  336.91   21.51
  -3   3   0  351.60   17.11
   3  -2  -2   51.07    5.45
   3  -3   0  335.56   15.19
  -3   3   0  308.20   22.12
  -3   2   2   49.19    7.65
  -3   3   0  341.23   22.75
  -3   2   2   52.78    5.22
   3  -2  -2   51.91    6.72
  -3   2   2   49.69    2.83
   3  -2  -2   40.94   10.51
   3  -2  -2   49.58    3.40
   3  -3   0  270.73   30.97
   3  -3   0  334.88   20.01
   3  -2   2  129.66    9.46
   3  -2   2  134.65    7.05
   3  -2   2  141.90   10.42
  -3   2  -2  127.31    7.23
  -3   2  -2  141.66   10.51
  -3   2  -2  134.95    8.13
   3  -2   2  124.17    8.34
  -3   2  -2  137.57   10.00
   3  -2   2  131.06   18.31
   2  -2   5  772.27   41.84
  -2   2  -5  700.66   40.19
   2  -2   5  666.00   38.02
  -2   2  -5  675.04   36.08
  -2   2  -5  662.69   37.85
   2  -2   5  542.56   38.51
   2  -2   5  638.87   56.29
   1  -5   4  108.65    6.02
   1  -5   4  112.18    9.25
  -1   5  -4  120.59   14.08
  -1   5  -4  120.66    7.10
   1  -5   4   95.02   19.78
   1  -5   4  107.90   12.72
  -1   5  -4  130.95   12.25
   2  -2  -5   28.18    4.77
  -2   2   5   28.86    4.70
  -2   2   5   23.34    2.62
  -2   2   5   23.87    4.84
   2  -2  -5   31.93    2.11
  -2   2   5   33.67    2.26
  -1   6  -2  214.45   17.39
  -1   6  -2  186.15   23.12
   1  -6   2  181.54   35.71
  -1   6  -2  211.72   18.28
   1  -6   2  160.29   13.07
   1  -6   2  184.09   15.78
   1  -6   2  171.69    7.35
   1  -6   2  161.37    9.47
   0   6   2  153.78   31.95
   0  -6  -2  143.68    8.76
   0   6   2  143.38    9.35
   0  -6  -2  111.96    8.34
   0   6   2  162.18   12.60
   1   5   3    0.64    5.50
  -1  -5  -3    0.15    0.76
   1   5   3    1.24    1.41
   1   5   3    0.84    0.70
  -1  -5  -3    3.09    1.45
  -1  -2   6  352.90   20.27
   1   2  -6  329.35   13.82
  -1  -2   6  321.14   15.85
   1   2  -6  369.57   19.61
  -1  -2   6  320.78   15.18
  -1  -2   6  337.85   20.93
  -1  -2   6  364.37   26.39
   0   5   4  135.22    7.75
   0  -5  -4  141.91    9.14
   0  -5  -4  105.87    6.43
   0   5   4  145.98    9.35
   0   5   4  140.96   30.96
   0  -3   6  316.51   17.27
   0  -3   6  312.85   27.12
   0   3  -6  294.33   13.52
   0  -3   6  333.54   33.32
   0   3  -6  337.01   19.37
   2   1   5  550.22   27.07
  -2  -1  -5  512.54   26.47
   2   1   5  504.97   27.70
   2   1   5  521.69   30.46
   2   1   5  473.09   25.11
   3  -3   1   16.50    1.88
  -3   3  -1   19.09    3.42
  -3   3  -1   22.86    3.49
  -3   3  -1   19.41    3.77
   3  -3   1   18.65    3.07
  -3   3  -1   23.40    4.73
   3  -3   1   18.65    3.21
  -3   3  -1   24.60    3.15
   3  -3   1   12.40    7.42
  -3   3   1  246.74   17.31
   3  -3  -1  197.46   26.08
  -3   3   1  216.47   14.34
  -3   3   1  251.42   11.86
  -3   3   1  235.13   15.75
   3  -3  -1  222.67    9.85
   3  -3  -1  232.24   13.34
   3  -3  -1  230.94   15.06
  -3  -1   2   26.29    3.78
  -3  -1   2   21.76    3.18
   3   1  -2   25.16    3.87
  -3  -1   2   22.21    4.49
  -3  -1   2   24.51    3.06
   3   1  -2   22.41    3.34
  -3  -1   2   20.64    2.47
   3   1  -2   26.08    4.44
  -2  -3   4   93.70    7.47
  -2  -3   4   87.47   12.59
   2   3  -4   88.39    8.22
   2   3  -4   96.50    7.14
  -2  -3   4   88.82    6.00
  -2  -3   4   86.91    7.87
  -2  -3   4   84.63    6.07
   2   3  -4   88.39    6.45
  -1   4   5   86.92    6.87
  -1   4   5   63.04    9.48
  -1   4   5   86.03   26.49
   1  -4  -5   69.25    6.13
  -1   6   2   60.81    6.55
  -1   6   2   64.38    8.69
  -1   6   2   67.10   15.76
   1  -6  -2   55.18    5.87
  -1   6   2   40.55    5.08
  -1   6   2   53.66    6.13
  -3  -1  -2  968.26   57.07
   3   1   2  969.43   55.52
   3   1   2  857.04   55.41
   3   1   2  924.23   58.59
  -3  -1  -2  930.12   58.65
   2  -4   4   23.33    3.04
  -2   4  -4   25.12    3.89
  -2   4  -4   34.53    4.54
  -2   4  -4   26.83    5.15
   2  -4   4   24.87   11.14
   2  -4   4   24.34    5.36
   2  -4   4   26.67    2.81
   1  -5  -4  237.30   14.51
  -1   5   4  178.32   19.16
  -1   5   4  226.83   12.44
  -1   5   4  252.79   16.78
  -1   5   4  261.04   39.43
  -1   5   4  221.78   12.98
   1   2   6  504.34   25.42
   1   2   6  461.61   23.59
   0   3   6  763.12   35.88
   0   3   6  699.00   35.31
   0  -3  -6  669.30   37.95
   0   3   6  667.12   69.27
   0   3   6  701.20   39.20
   3   2   0   89.96    7.98
   3   2   0   89.67    6.37
  -3  -2   0   83.65    7.77
  -3  -2   0   85.95    5.67
  -3  -2   0   81.91    7.82
   3   2   0   80.84    7.68
  -2   4   4  227.57   18.89
  -2   4   4  269.49   16.60
  -2   4   4  199.54   24.12
  -2   4   4  328.06   21.73
  -2   4   4  265.49   13.76
   2  -4  -4  291.71   19.22
   3  -1  -3  347.57   22.02
   3  -1  -3  370.23   26.31
   3  -1  -3  377.52   21.88
  -3   1   3  328.04   16.03
  -3   1   3  324.59   22.68
   3  -1  -3  375.11   21.38
  -3   1   3  350.04   22.36
  -3   1   3  334.83   20.08
  -2  -3  -4  891.23   57.26
  -2  -3  -4  986.93   60.60
   2   3   4  916.33   55.61
   2   3   4  979.34   53.33
   2   3   4  878.29   58.43
   3   2  -1   73.91    7.15
   3   2  -1   70.00    5.63
  -3  -2   1   65.83    6.97
  -3  -2   1   67.76    6.65
   3   2  -1   64.75    6.69
  -3  -2   1   66.40    4.73
  -3  -2   1   58.44    4.79
  -3  -2   1   56.54    6.77
   3   0  -3   92.04    6.35
  -3   0   3   83.98    4.88
   2   4  -3   19.13    3.70
  -2  -4   3   21.39    6.48
  -3   0   3   71.85    7.61
  -3   0   3   80.78    7.00
   2   4  -3   17.67    2.86
   2   4  -3   20.90    3.03
  -3   0   3   79.20    6.52
  -2  -4   3   15.87    2.53
  -2  -4   3   17.51    3.31
   3   0  -3   86.65    6.80
   3   0  -3   83.23    7.22
   3   0  -3   82.78    8.45
  -2  -4   3   21.61    4.78
   3  -1   3 1354.72   85.31
  -3   1  -3 1207.35   83.78
   3  -1   3 1185.74   83.00
  -3   1  -3 1672.75  111.79
   3  -1   3 1255.94   86.59
   1   6   0  191.79   12.56
  -1  -6   0  197.80   16.74
  -1  -6   0  199.41   12.50
   1   6   0  195.30    8.61
   1   6   0  202.82   13.10
   1   6   0  211.67   14.13
  -1  -6   0  175.52    7.38
   1   6   0  209.96   30.47
  -1   3  -6  251.98   16.87
   1  -3   6  312.41   18.56
   1  -3   6  253.44   30.52
  -1   3  -6  271.74   14.47
   1  -3   6  264.83   23.71
   1  -3   6  266.06   15.01
  -2  -2   5 1361.22  104.19
  -2  -2   5 1392.22   98.79
   2   2  -5 1538.60  108.39
  -2  -2   5 1337.31   95.18
   2   2  -5 1445.63   94.07
  -2  -2   5 1410.12   92.64
   2   2  -5 1566.31  101.88
  -2  -2   5 1492.91  106.75
  -1  -4   5  279.86   17.96
   1   4  -5  279.38   14.19
   1   4  -5  272.71   17.72
  -1  -4   5  279.07   24.92
  -1  -4   5  283.40   19.21
  -1  -4   5  272.96   18.46
   1   4  -5  269.48   15.50
  -3  -2  -1   79.21    5.94
   3   2   1   93.41    8.06
  -3  -2  -1   96.97    8.00
   3   2   1   81.56    5.93
   3   2   1  103.54    8.27
   3  -3   2   10.36    3.00
   3  -3   2    8.66    7.02
  -3   3  -2   11.58    1.95
  -3   3  -2   12.42    3.18
   3  -3   2   13.01    2.23
  -3   3  -2   11.16    2.42
   3  -3   2   12.26    1.73
   3  -3   2    8.70    2.70
  -3   3  -2   14.74    3.90
   0  -6   3   10.73    1.72
   0   6  -3    8.71    3.62
   0   6  -3   12.73    2.18
   0  -6   3    5.73    9.35
   0  -6   3    9.91    4.51
   0  -6   3    6.98    3.03
   0   6  -3    7.34    5.70
   0   6  -3   13.11    4.03
  -2   5  -3   84.28    8.27
   2  -5   3   78.95    5.50
   2  -5   3   79.42    9.80
  -2   5  -3   99.57    9.16
   2  -5   3   68.58   20.66
   2  -5   3   78.14    5.01
  -2   5  -3   92.11   11.19
  -3   3   2  205.25   15.13
  -3   3   2  221.02   14.64
   3  -3  -2  206.57    9.61
  -3   3   2  228.76   10.51
   3  -3  -2  170.72   23.15
  -3   3   2  252.40   17.87
   3  -3  -2  239.68   15.98
   3   0   3   38.33    4.86
   3   0   3   32.34    4.00
   3   0   3   26.64    3.21
  -3   0  -3   24.38    4.02
  -3   0  -3   30.96    3.78
  -1  -6   1  248.06   11.08
   1   6  -1  288.97   18.27
   1   6  -1  286.29   14.60
  -1  -6   1  284.41   22.59
   1   6  -1  295.59   19.62
   1   6  -1  279.20   37.88
  -1  -6   1  265.61   18.04
   1   6  -1  285.87   22.06
   2  -3   5   28.78    3.60
   2  -3   5   26.22   11.23
  -2   3  -5   26.33    4.27
   2  -3   5   28.92    3.66
  -2   3  -5   30.65    3.57
   2  -3   5   21.72    4.89
  -2   3  -5   28.56    3.86
   0   0   7  190.54   15.10
   0   0   7  191.45   11.35
   0   0   7  207.01   11.82
   0   0   7  175.01    9.87
   1   6   1   32.96    2.20
   1   6   1   36.48    3.99
   1   6   1   34.36    6.11
  -1  -6  -1   33.33    3.30
  -1  -6  -1   28.97    7.80
   1   6   1   30.73   15.08
   1   6   1   24.31    4.36
   3  -2  -3  181.39   13.51
   3  -2  -3  213.87   15.18
  -1   3   6  467.28   33.73
   1  -3  -6  473.02   29.22
  -3   2   3  201.55    9.68
  -3   2   3  194.11   17.11
  -3   2   3  181.09   11.78
  -1   3   6  492.77   29.57
   3  -2  -3  197.60    9.95
   3  -2  -3  196.95   12.78
  -1   3   6  468.73   55.74
  -3   2   3  163.37   13.97
   3  -2   3  432.85   22.34
  -3   2  -3  448.70   26.42
   3  -2   3  437.81   43.79
   3  -2   3  394.06   22.91
  -3   2  -3  413.21   27.07
   3  -2   3  394.54   22.46
  -2   5   3   14.76    2.88
  -2   5   3   11.31    5.47
  -2   5   3   19.25    3.35
   2  -5  -3   16.50    4.09
  -2   5   3   16.75    4.83
  -2   5   3   17.53    7.98
  -2   3   5   31.61    2.95
   2  -3  -5   43.74    5.32
  -2   3   5   23.42    8.14
  -2   3   5   46.80    5.30
  -2   3   5   38.52    5.89
  -2   3   5   31.42    2.93
  -2  -4  -3   73.08    6.56
   2   4   3   68.67    5.51
   2   4   3   63.66    3.96
  -2  -4  -3   58.39    4.56
   2   4   3   73.80   11.26
   2   4   3   78.28    7.60
  -1   6  -3  179.48   15.54
   1  -6   3  148.62    7.32
   1  -6   3  148.32   31.72
   1  -6   3  120.10    8.02
  -1   6  -3  168.29   16.05
   1  -6   3  141.16   14.10
   0  -1   7  116.57   13.30
   0  -1   7  141.80    8.76
   1   5  -4  197.20   11.23
  -1  -5   4  143.85   18.97
  -1  -5   4  190.82   10.58
   1   5  -4  189.70   13.17
   1   5  -4  181.71    9.95
  -1  -5   4  195.78   19.46
  -1  -5   4  182.95   13.90
  -1  -5   4  203.69   16.06
   2   2   5    7.49    2.78
  -2  -2  -5    9.02    2.46
   2   2   5   14.85    2.15
   0  -6  -3   24.88    4.05
   0   6   3   29.17   15.69
   0  -6  -3   21.87    2.76
   0   6   3   27.46    3.33
   0   6   3   26.17    4.82
   0   1   7   59.46    6.09
   0   1   7   87.53    6.19
   0   1   7   65.28    5.39
   0   1   7   71.40    4.74
   0   1   7   76.99    8.85
  -3  -1   3   25.67    2.82
   3   1  -3   25.44    3.77
   3   1  -3   23.38    4.80
  -3  -1   3   21.69    4.34
   3   1  -3   24.97    3.60
  -3  -1   3   24.83    4.12
  -3  -1   3   24.95    3.93
  -3  -1   3   27.45    4.22
  -3  -2   2  739.81   48.78
  -3  -2   2  729.47   48.92
  -3  -2   2  684.75   45.73
   3   2  -2  776.97   46.69
   3   2  -2  807.22   50.83
  -3  -2   2  693.05   40.62
  -3  -2   2  753.30   41.95
   3   2  -2  769.61   49.72
   3  -4   0   55.89    3.46
   1   4   5  835.15   40.94
   1   4   5  753.30   39.70
  -3   4   0   65.20    5.69
   1   4   5  776.79   87.70
   3  -4   0   62.21    6.56
   3  -4   0   62.50   17.21
   3  -4   0   59.32    3.62
  -3   4   0   75.38    9.14
  -3   4   0   60.29    6.92
  -3   4   0   65.05    7.15
  -1  -3   6   55.81    4.46
  -1  -3   6   57.80    5.61
  -1  -3   6   59.33    6.55
   1   3  -6   56.68    3.46
  -1  -3   6   47.90    3.67
  -1  -3   6   61.98    9.30
   1   3  -6   59.99    5.47
   2   5   0  511.57   27.76
   2   5   0  515.03   35.38
   2   5   0  514.86   54.92
   2   5   0  529.15   32.95
  -2  -5   0  485.11   24.21
  -2  -5   0  524.45   38.01
  -1   6   3  111.77   26.34
  -1   6   3   94.36   13.50
   1  -6  -3  122.36    9.56
  -1   6   3  125.46   10.97
  -1   6   3  144.32   13.54
  -1   6   3  137.54   10.89
   2  -6   0   54.74    7.54
  -2   6   0   52.41    5.02
  -2   6   0   47.22    7.48
   2  -6   0   51.19   21.89
  -2   6   0   49.33   13.69
  -2   6   0   69.10   10.63
  -1  -6   2  379.92   28.71
   1   6  -2  396.53   26.44
   1   6  -2  363.48   17.98
  -1  -6   2  327.99   15.81
   1   6  -2  346.17   33.55
   1   6  -2  388.50   24.52
   1   6  -2  335.78   22.65
  -1  -6   2  350.44   26.50
   3   2   2    3.25    1.97
   3   2   2    5.73    2.12
   3   2   2    3.54    1.93
  -3  -2  -2    1.09    1.64
  -3  -2  -2    2.78    1.99
  -3  -1  -3  220.78   13.16
   3   1   3  222.60   14.02
   3   1   3  235.44   12.33
   3   1   3  228.98   14.08
  -3  -1  -3  223.05   13.59
  -3   4  -1  132.13    9.40
   3  -4   1  136.43    7.15
  -3   4  -1  132.89   11.12
   3  -4   1  127.18    6.02
   3  -4   1  142.43   11.21
  -3   4  -1  115.98   11.12
   3  -4   1  107.24   21.66
  -3   4  -1  147.26   13.78
  -2  -5   1   35.92    2.94
   2   5  -1   33.19    5.41
  -2  -5   1   29.59    4.34
   2   5  -1   36.53    9.50
   2   5  -1   31.05    5.46
  -2  -5   1   38.11    7.30
  -2  -5   1   35.69    4.71
   2   5  -1   35.84    3.88
   0   5  -5    4.08    2.12
   0  -5   5    5.90    5.60
   0  -5   5    3.77    5.83
   0   5  -5    4.70    2.76
   0  -5   5    2.92    1.66
   0  -5   5    5.38    1.89
   0   5  -5    4.52    2.02
   3  -4  -1   90.88    4.68
  -3   4   1  112.48   11.28
   3  -4  -1  100.97   21.06
  -3   4   1   92.92    8.02
   3  -4  -1  108.19    9.30
  -3   4   1  106.29    9.09
   2  -6   1   46.82    7.37
  -2   6  -1   60.40    8.26
  -2   6  -1   42.90    7.45
  -2   6  -1   54.42   10.32
   2  -6   1   47.42   20.14
  -2   6  -1   46.84    4.80
  -1  -5  -4    2.53    1.67
   1   5   4   -0.33    6.27
   1   5   4    0.19    0.97
   1   5   4    1.11    0.54
   2   5   1  133.91   27.58
   2   5   1  144.66    9.87
  -2  -5  -1  143.92    7.42
  -2  -5  -1  146.45   13.67
   2   5   1  142.36   15.82
   2   5   1  144.64   10.85
  -2   6   1   15.41    3.61
   2  -6  -1   22.58    4.40
   2  -6  -1   13.15   12.86
  -2   6   1   18.75    6.43
  -2   6   1   14.00    4.20
  -2   6   1   13.35    9.62
   0  -4   6   35.84   12.35
   0  -4   6   38.37    4.63
   0   4  -6   41.69    5.05
   0   4  -6   41.32    4.68
   0  -4   6   31.29    2.88
   0  -4   6   41.25    8.94
   0   2  -7  454.31   27.18
   0  -2   7  430.42   40.60
   0  -2   7  368.08   38.27
   1   6   2  777.39   94.60
   1   6   2  781.19   47.05
   1   6   2  738.12   48.36
  -1  -6  -2  757.39   52.10
   1   6   2  674.01   33.93
  -2   0   6    0.73    1.61
   2   0  -6    1.82    1.12
  -2   0   6    1.59    1.18
  -2   0   6    0.85    2.02
  -2   0   6    1.80    2.10
  -1   0   7   35.50    3.91
  -1   0   7   29.55    5.55
  -1   0   7   29.41    3.80
   1   0  -7   27.69    3.45
   1   3   6  416.46   19.86
   1   3   6  377.68   18.78
  -2   1   6  302.06   15.88
   2  -1  -6  299.74   16.55
  -2   1   6  306.68   21.52
  -2   1   6  258.53   18.07
  -3   3  -3   57.45    7.97
   3  -3   3   59.23    4.20
  -3   3  -3   45.94    4.81
   3  -3   3   52.27    4.96
   3  -3   3   42.22   15.06
  -3   3  -3   63.72    7.54
   3  -3   3   59.42    5.20
  -1   5  -5   93.21   12.16
   1  -5   5   81.76   12.82
  -1   5  -5   92.53    9.45
   1  -5   5   79.12   18.76
   1  -5   5   84.37    5.74
   1  -5   5   85.50    9.30
   1   0   7    5.10    2.56
   1   0   7    2.07    1.09
   1   0   7    3.49    1.47
   1   0   7    6.21    1.72
  -1   5  -5   91.20    7.78
  -3   3   3  227.87    9.95
  -3   3   3  294.03   20.67
   3  -3  -3  253.08   11.39
  -3   3   3  249.48   18.94
   3  -3  -3  268.60   18.61
  -3   3   3  261.80   15.98
   2  -1   6  166.89   10.81
   2  -1   6  198.01   10.73
  -2   1  -6  153.94    8.54
   1  -1   7  863.34   65.22
   1  -1   7  884.14   52.38
   1  -1   7 1036.95   62.40
   2   0   6   80.85    6.07
   2   0   6   98.84    5.24
  -1   1   7  449.41   24.60
   1  -1  -7  455.29   23.98
  -1   1   7  399.42   25.23
  -1   1   7  481.24   31.80
   0   2   7   94.96   11.10
   0   2   7  100.44    6.15
   0   2   7   97.13    5.21
   0   2   7   87.50    7.69
   0   2   7   94.55    8.05
   0   5   5  256.06   15.27
   0   5   5  281.37   48.75
   0  -5  -5  239.77   12.78
  -1  -1   7  117.39    8.97
   1   1  -7  150.51    9.56
   2   5  -2    2.30    2.22
  -1  -1   7  156.65   15.18
  -2  -5   2    2.07    2.05
   2   5  -2    1.36    3.36
  -1  -1   7  145.30    9.95
  -2  -5   2    1.74    1.19
   2   5  -2    2.43    1.64
   2   5  -2    1.96    1.91
  -2  -5   2    2.21    2.30
   3   3   0  449.97   29.58
  -3  -3   0  427.20   23.19
  -3  -3   0  427.80   28.43
   3   3   0  451.21   42.75
   3   3   0  461.20   30.02
   3   3   0  458.64   25.96
   3  -1  -4  121.01   12.81
  -3   4  -2  116.20    8.93
   3  -4   2  110.56   27.75
   3  -1  -4  110.10   10.23
  -3   1   4  115.04   10.38
  -3   4  -2   98.13    6.70
  -3   1   4  117.02    6.02
   3  -4   2  132.50    6.55
  -3   4  -2  143.04   14.13
   3  -4   2  128.66    7.26
   3  -1  -4  122.84    8.34
  -3   1   4   96.77    9.18
  -3   4  -2  124.69   10.85
   3  -4   2  115.06    9.84
  -3   1   4   98.80   10.05
   3  -1  -4  115.18    6.61
  -2  -3   5   99.21   11.79
   2   3  -5  104.20    7.50
  -2  -4   4   39.77    7.28
  -2  -4   4   38.16    5.37
   2   4  -4   42.65    5.20
  -2  -4   4   40.52    7.56
  -2  -4   4   40.56    5.34
   2   4  -4   43.21    4.61
   2   4  -4   42.70    4.61
  -2  -3   5   99.92    8.93
  -2  -3   5   93.70    9.84
  -2  -3   5   89.08    6.71
  -2  -3   5   96.49    6.95
   2   3  -5   97.12    6.85
   2   3  -5   95.68    7.42
  -3   0   4  205.86   15.62
  -2   6  -2  152.16   16.86
  -3   0   4  216.22   15.48
   2  -6   2  116.06   31.36
  -2   6  -2  108.02   11.85
   2  -6   2  119.48    6.00
  -2   6  -2  145.27   14.11
   2  -6   2  122.91    6.28
   2  -6   2  127.49   13.32
  -3   0   4  213.64   11.11
  -3   0   4  201.57   13.31
   3   0  -4  222.08   12.51
   3   0  -4  240.22   18.97
   3   0  -4  216.85   13.49
  -2  -1   6  120.69    7.71
  -2  -1   6  118.88   13.58
   2   1  -6  121.86    7.67
  -2  -1   6  103.11    8.32
  -3   4   2   54.96    6.73
  -3   4   2   65.33    8.51
  -3   4   2   52.64    6.09
   3  -4  -2   38.29   18.39
  -2  -1   6  123.66   11.83
   3  -4  -2   59.13    7.21
   0  -7   0    1.10    1.75
   0   7   0    1.82    4.77
   0   7   0    0.64    1.22
   0  -7   0    2.07    1.77
   0   7   0    1.16    2.31
   0   7   0    1.16    1.98
   3  -1   4  449.33   26.80
   3  -1   4  398.30   24.28
   3  -1   4  456.36   24.14
   3  -1   4  430.55   26.21
  -3   1  -4  417.42   24.88
  -3  -3   1  346.69   24.00
   3   3  -1  376.43   22.38
   3   3  -1  373.49   24.55
  -1   4  -6  197.91   11.06
  -1   4  -6  206.75   14.37
   1  -4   6  172.62   26.68
   3   3  -1  398.94   26.32
   1  -4   6  193.74   11.50
   1  -4   6  190.19   20.49
  -1   4  -6  174.02   11.90
  -3  -3   1  360.06   19.39
   1  -4   6  201.64   14.19
   0   4   6    0.96    1.26
   0   4   6    1.71    6.01
   0  -6   4   15.17    6.03
   0  -6   4   14.00    2.57
   0  -6   4   18.92    3.52
   0   6  -4   16.10    2.93
   0   6  -4   15.60    4.72
   0   6  -4   16.53    4.21
   0  -6   4   22.95   11.32
   2  -5   4   40.94   16.53
   2  -5   4   59.34    4.28
  -2   5  -4   60.60    6.75
  -2   5  -4   57.77    7.90
   2  -5   4   45.47    4.60
  -2   5  -4   69.85    8.94
   2  -5   4   52.66    8.76
  -2   4  -5  236.32   16.32
   2  -4   5  171.68   20.04
  -2   4  -5  213.63   13.15
   2  -4   5  155.48   11.31
   2  -4   5  203.60   30.75
  -2   4  -5  212.51   15.44
   2  -4   5  204.40   11.64
   3   2  -3  329.23   20.81
  -3  -2   3  326.79   17.50
  -3  -2   3  312.62   24.69
   3   2  -3  329.27   22.10
  -3  -2   3  304.90   21.29
  -3  -2   3  309.87   18.97
   3   2  -3  324.60   19.47
  -3  -2   3  297.11   23.72
  -1   7   0  258.44   23.54
   1  -7   0  226.98   44.77
  -1   7   0  221.40   36.57
  -1   7   0  215.29   15.87
   1  -7   0  205.87   16.48
   2  -2   6  397.62   22.83
   2  -2   6  350.35   36.85
  -2   2  -6  390.12   21.12
  -2   2  -6  365.34   18.13
   2  -2   6  277.54   20.78
   2  -2   6  436.33   23.43
   1   1   7   10.36    2.06
  -3  -3  -1  153.28   11.90
  -3  -3  -1  143.58    8.93
   3   3   1  146.73    9.21
   3   3   1  152.79   11.78
   3   3   1  146.77   20.71
   3   3   1  160.45   12.63
   0  -7   1    3.12    2.12
   0  -7   1    1.66    3.74
   0   7  -1    1.65    1.27
   0   7  -1    2.88    3.69
   0   7  -1    2.10    2.39
   0   7  -1    4.09    5.35
   0  -7   1    2.76    2.40
   2   5   2  266.71   13.35
   2   5   2  274.34   17.01
  -2  -5  -2  280.86   13.85
   2   5   2  259.56   19.45
   2   5   2  271.08   44.31
  -2  -5  -2  269.19   21.52
  -1   5   5  345.84   63.71
  -1   5   5  265.03   26.51
  -1   5   5  360.99   23.78
   1  -5  -5  318.28   20.02
   3   0   4  188.25   12.06
   3   0   4  214.09   13.66
  -3   0  -4  201.85   12.83
  -2   6   2   14.72    5.15
  -3   0  -4  286.38   15.14
   2  -6  -2    6.84    8.88
   3   0   4  235.27   12.78
  -2   6   2   11.09    4.26
  -2   6   2    7.46    4.50
   2  -6  -2    9.06    3.57
  -2   6   2    8.38    8.31
  -2   2   6  279.10   13.29
   2  -2  -6  274.67   14.49
  -2   2   6  263.08   20.31
  -2   2   6  281.58   19.97
   2  -2  -6  279.35   20.69
   1   6  -3   22.30    2.80
   1   6  -3   16.38    2.47
   1   6  -3   28.72    3.07
   1   6  -3   16.92    5.82
  -1  -6   3   22.44    6.27
  -1  -6   3   20.26    5.37
   1   6  -3   23.86    4.65
  -1  -6   3   21.11    2.38
   1  -7   1  157.47   37.57
  -1   7  -1  170.06   17.88
  -1   7  -1  169.58   29.38
  -1   7  -1  177.17   16.72
   1  -7   1  145.47   13.85
  -1   7  -1  150.33   10.04
   1  -2   7   19.24    8.68
   1  -2   7   38.24    4.70
   1  -2   7   30.33    4.04
   1  -2   7   31.05    7.47
   0  -7  -1  265.41   17.35
   0   7   1  263.39   40.04
   0   7   1  320.85   23.38
   0  -7  -1  229.37   16.78
   0   7   1  293.95   19.14
  -1   6  -4  165.85   15.47
   1  -6   4  139.68   31.48
  -1   6  -4  174.80   17.10
   1  -6   4  144.31    8.53
   1  -6   4  157.50   12.72
  -1   6  -4  158.51   10.07
   1  -6   4  134.68   16.41
   2   1   6 1119.81   67.23
   2   1   6 1072.03   70.48
  -3   2   4  252.21   12.20
   3  -2  -4  275.86   16.09
  -3   2   4  218.83   17.72
  -3   2   4  219.88   13.65
   3  -2  -4  249.89   18.23
   3  -2  -4  232.51   12.53
  -3   2   4  257.70   18.80
  -3   2  -4    0.82    1.56
   3  -2   4    0.49    3.03
  -3   2  -4    0.47    0.89
   3  -2   4    0.11    1.23
   3  -2   4   -0.14    0.96
   2  -4  -5  282.49   19.30
  -2   4   5  235.08   20.75
  -2   4   5  287.87   20.33
  -2   4   5  174.82   29.84
  -3  -2  -3  120.98    8.55
   3   2   3  112.61    8.58
   3   2   3  110.69    9.63
   3   2   3  124.07    8.98
  -3  -2  -3  114.45    9.04
  -2   5   4    2.84    4.30
   2  -5  -4    3.38    2.34
  -2   5   4    1.81    2.72
  -2   5   4    2.26    1.76
  -2   5   4    1.92    1.35
  -2   5   4    2.69    2.73
  -1   7   1  290.78   43.98
  -1   7   1  317.72   19.01
  -1   7   1  281.75   22.78
   1  -7  -1  276.16   20.60
  -1   7   1  340.91   29.24
  -2  -4  -4   55.50    5.60
   2   4   4   47.04    3.26
   2   4   4   43.31    5.18
  -2  -4  -4   36.45    5.47
   2   4   4   39.37   10.76
   2   4   4   33.89    8.35
   2   3   5   88.78    5.15
  -2  -3  -5   84.46    5.94
   2   3   5   87.08    8.47
  -1   4   6    9.45    9.07
  -1   4   6    7.68    2.83
  -1   4   6    7.40    4.09
   1  -4  -6    8.60    3.51
  -1   2   7    3.88    5.42
  -1   2   7    1.66    1.44
  -1   2   7    0.99    1.37
  -1   2   7    2.44    1.98
  -1   2   7    3.15    1.19
  -1   2   7    5.23    2.16
  -3  -1   4   73.80    7.22
  -3  -1   4   85.96    8.49
   3   1  -4   90.23    9.67
  -3  -1   4   71.68    7.93
  -3  -1   4   77.07    7.80
   3   1  -4   85.54    6.42
   3   1  -4   84.82    6.97
  -3  -1   4   86.72    7.04
   0  -6  -4   57.37    5.28
   0  -6  -4   77.10    5.60
   0   6   4   83.68    7.90
   0   6   4   77.31    5.30
   0   6   4   81.26   27.01
  -3  -3   2  245.74   17.88
   3   3  -2  278.66   17.66
  -3  -3   2  267.55   19.90
  -3  -3   2  269.51   14.69
   3   3  -2  292.22   19.83
  -3  -3   2  252.91   21.15
  -3  -3   2  246.69   14.22
   3   3  -2  285.60   19.77
  -1  -2   7   83.85   12.10
   1   2  -7   86.62    9.39
  -1  -2   7   79.06    7.51
   0   3  -7  379.85   24.40
   0  -3   7  369.09   22.47
   0  -3   7  331.28   31.45
   0  -3   7  379.43   33.92
  -1  -6  -3  862.28   59.15
   1   6   3  893.66  139.00
   1   6   3  894.47   55.67
   1   6   3  867.51   61.02
   0  -7   2   85.36    4.17
   0  -7   2   87.42    9.31
   0   7  -2  103.39    5.84
   0  -7   2   84.76   21.64
   0   7  -2  111.86   11.80
   0   7  -2  112.32   10.88
   0  -7   2   91.55   10.63
   0   7  -2   96.55   19.17
  -1   6   4  268.24   43.44
  -1   6   4  217.53   22.55
  -1   6   4  215.30   15.30
  -1   6   4  210.10   12.55
  -1   6   4  275.22   20.49
   1  -6  -4  239.68   15.89
  -1  -5   5  346.30   32.16
  -1  -5   5  337.79   24.92
   1   5  -5  361.98   21.47
  -1  -5   5  325.25   18.93
  -1  -5   5  354.68   25.09
   1   5  -5  332.78   21.15
   3   1   4  190.30   10.75
   3   1   4  184.62   11.97
  -3  -1  -4  169.84   12.25
   3   1   4  197.17   12.64
  -3  -1  -4  189.47   13.96
   3   3   2   28.80    4.59
  -3  -3  -2   24.87    3.62
   3   3   2   31.90    5.48
   3   3   2   26.91    3.31
   1  -7   2  149.51   15.96
  -1   7  -2  185.79   18.54
  -1   7  -2  161.01   25.78
   1  -7   2  154.77   40.26
  -1   7  -2  185.83   19.52
  -3  -3  -2   28.86    4.70
  -1  -4   6   74.48    6.70
   2   5  -3   47.11    6.38
  -1  -4   6   81.30   12.75
  -2  -5   3   48.57    8.95
  -2  -5   3   46.40    5.77
   1   4  -6   70.80    5.26
   1   4  -6   80.24    7.20
  -2  -5   3   50.67    4.30
   2   5  -3   47.74    6.76
   2   5  -3   52.41    4.97
  -2  -5   3   54.56    8.73
  -1  -4   6   68.35    6.35
  -1  -4   6   70.64    8.40
   2   2  -6  110.80    6.55
   2   2  -6  125.91    7.67
  -2  -2   6  117.52    8.33
  -2  -2   6  125.81   14.21
   2   2  -6  123.83    8.44
  -2  -2   6  104.99    9.31
  -2  -2   6  130.69   11.40
  -2  -2   6  111.22    9.67
  -3   5   0   42.07    4.71
   3  -5   0   31.06   17.69
  -3   5   0   57.73    9.67
   3  -5   0   46.58    7.33
  -3   5   0   45.57    6.80
   3  -4   3   58.81   16.55
   3  -4   3   63.84    5.13
   3  -4   3   52.03    4.26
   3  -4   3   50.84    6.47
  -3   4  -3   59.97    6.97
  -3   4  -3   59.94    6.20
  -3   4  -3   66.84    9.15
  -2   6  -3  113.78   11.35
  -2   6  -3  139.08   14.40
   2  -6   3  112.05   30.76
   2  -6   3  111.00   12.96
  -2   6  -3  128.33   15.37
   2  -6   3   98.47    5.69
   2  -6   3  108.29    5.59
   0   7   2  100.36    8.15
   0   7   2   92.12   23.68
   0  -7  -2   91.99    7.17
   0  -7  -2   69.08    6.45
   0   7   2  110.09   13.57
  -2   3  -6  296.07   17.83
   2  -3   6  213.49   19.91
   2  -3   6  331.31   39.72
  -2   3  -6  296.07   17.74
   2  -3   6  303.84   17.69
  -2   3  -6  324.10   22.39
   2  -3   6  308.24   18.24
   1   2   7  591.87   32.80
  -3   4   3   28.16    6.03
   3  -4  -3   24.62    5.05
  -3   4   3   15.25    4.85
  -3   4   3   23.99    5.12
  -3   5  -1  130.60   10.97
   3  -5   1  143.78   13.12
  -3   5  -1  142.96   13.17
  -3   5  -1  170.52   17.36
   3  -5   1  137.52   32.02
  -3   5  -1  156.96   12.44
   0   3   7  211.06   11.71
   0   3   7  199.97   17.16
   0   3   7  208.97   31.82
   0   3   7  218.21   13.53
   0   3   7  190.82    8.45
   0   3   7  181.65    8.02
  -1   7   2  193.80   18.95
   1  -7  -2  188.11   15.10
  -1   7   2  200.22   19.24
  -1   7   2  230.01   21.37
  -1   7   2  227.17   16.76
  -1   7   2  199.59   35.55
   3  -5  -1   75.10   23.18
  -3   5   1   72.30    9.73
  -3   5   1   89.79   11.76
   3  -5  -1   82.90    9.40
  -3   5   1   75.99    8.68
   3  -3   4   31.72    4.01
   3  -3   4   23.47   13.03
  -3   3  -4   35.63    6.16
   3  -3   4   24.26    3.57
  -3   3  -4   20.87    3.48
  -3   3  -4   29.37    4.31
   3  -3   4   31.74    3.43
  -3   3   4   83.97    6.77
  -3   3   4   84.33    9.96
   3  -3  -4   97.58    9.82
  -3   3   4  103.64   10.78
  -2   3   6    4.38    3.15
  -2   3   6    5.84    3.02
   2  -3  -6    6.94    3.11
   1  -3   7   34.84    8.10
   1  -3   7   22.28    4.53
   1  -3   7   30.73    4.07
   1  -3   7   33.91   10.69
  -2   6   3   24.92   13.13
  -2   6   3   48.33    8.34
  -2   6   3   22.38    6.09
   2  -6  -3   42.76    6.09
  -2   6   3   36.17    6.23
   2   5   3   62.06    8.09
  -2  -5  -3   58.77    5.42
   2   5   3   64.03   23.17
  -2  -5  -3   65.27    8.45
   2   5   3   65.40    6.05
   2   5   3   61.49    4.07
   2   2   6  238.01   11.70
   2   2   6  182.22   13.77
   1   5   5   87.06   30.75
   1   4   6   36.22    2.67
   1   4   6   54.90   17.71
   1   4   6   36.51    2.89
  -3  -2   4  270.69   19.92
   3   2  -4  311.08   18.46
  -3  -2   4  288.75   22.31
  -3  -2   4  318.89   21.48
  -3  -2   4  311.21   17.27
  -3  -2   4  272.47   23.26
   3   2  -4  287.80   21.28
   3   2  -4  296.23   18.89
   0   5  -6   -0.21    1.78
   0  -5   6    4.74    2.10
   0  -5   6    4.76    2.69
   0   5  -6    3.68    2.56
   0  -5   6    3.95    5.81
   0  -5   6    2.10    1.95
   0  -5   6    6.28    4.36
   0   5  -6    7.91    2.45
  -3  -3   3   87.43    8.59
   3   3  -3   89.07    8.62
  -3  -3   3   87.75    9.75
  -3  -3   3   92.48    6.69
   3   3  -3   94.31    9.06
  -3  -3   3   86.81    7.56
  -3  -3   3   86.24    9.93
   3   3  -3   94.92    8.07
   1  -3  -7  337.27   22.22
  -1   3   7  305.54   56.52
  -1   3   7  301.83   23.75
  -1   3   7  339.83   22.13
  -1  -6   4   25.56    7.67
  -1  -6   4   24.71    2.92
   1   6  -4   24.89    6.51
  -1  -6   4   16.52    5.12
   1   6  -4   28.17    3.46
  -1  -6   4   25.31    5.92
  -3   5  -2  339.95   29.28
   3  -5   2  293.51   15.63
  -3   5  -2  317.65   22.40
   3  -5   2  292.06   48.67
   3  -5   2  288.97   14.85
  -3   5  -2  299.79   22.70
   3  -5   2  287.40   22.84
   0  -7   3  167.97   14.69
   0   7  -3  218.88   18.56
   0  -7   3  180.97   18.58
   0  -7   3  170.75   35.45
   0   7  -3  173.48   23.25
   0   7  -3  198.16   16.08
   0  -7   3  174.79    9.99
   0   7  -3  200.06   11.20
   1   7   0    0.84    1.60
   1   7   0    0.28    1.98
  -1  -7   0    2.85    2.19
   1   7   0    0.24    0.90
   1   7   0    0.64    1.76
  -1  -7   0    0.42    0.79
  -1  -7   0    1.47    1.43
   1   7   0   -0.26    3.96
  -2  -4   5   28.78   10.06
  -2  -4   5   28.82    5.24
   2   4  -5   28.00    4.33
  -2  -4   5   31.84    8.43
  -2  -4   5   27.36    3.92
   2   4  -5   30.71    4.26
   2   4  -5   28.42    3.99
  -3   5   2    5.55    2.96
   3  -5  -2    8.50    3.49
  -3   5   2    5.90    2.90
   3  -5  -2    7.39    8.05
  -3   5   2    7.36    4.44
   3  -1  -5  117.51    7.81
  -3   1   5  125.13   11.94
  -3   1   5  127.32    6.52
   3  -1  -5  110.62    6.56
   3  -1  -5  122.59   11.87
  -3   1   5   91.19    7.47
  -3   1   5   95.79   10.85
   1  -7   3    2.78    3.22
   1  -7   3    2.45    1.37
   1  -7   3    2.63    1.36
  -1   7  -3    4.45    3.45
   1  -7   3    1.56    8.22
  -1   7  -3    2.26    2.78
  -1   7  -3    0.46    1.78
   1   3  -7  147.99   11.69
  -3   0   5  115.09   11.94
  -3   0   5  109.50    9.07
  -3   0   5  145.50   13.70
   3   0  -5  142.75    9.34
  -1  -3   7  147.36   11.45
  -1  -3   7  143.25   12.53
  -3   0   5  158.05    8.78
   3   0  -5  144.26   15.02
  -3   0   5  164.99   13.56
   3   0  -5  147.65    8.88
  -1  -3   7  138.62   18.37
  -1  -7   1  165.85   13.22
  -1  -7   1  164.60    7.56
   1   7  -1  165.63    8.35
   1   7  -1  184.91   14.60
   1   7  -1  163.34   32.59
  -1  -7   1  185.67   17.27
   1   7  -1  156.93   14.09
   1   7  -1  195.19   14.06
   0   6  -5  163.53   13.99
   0  -6   5  112.51   28.05
   0  -6   5  144.12   19.11
   0   6  -5  144.06   11.46
   0  -6   5  105.39    9.11
   0  -6   5  141.51   11.26
   0   6  -5  151.93   10.48
   3   4   0  139.17   10.27
   3   4   0  142.97   13.07
  -3  -4   0  141.26    8.70
  -3  -4   0  124.34   12.84
   3   4   0  130.21   15.97
   0   0   8    2.59    1.89
   0   0   8    3.36    3.01
  -3  -2  -4  577.55   39.08
   3   2   4  536.32   35.49
   3   2   4  526.71   32.37
  -3  -2  -4  523.99   32.71
   3   2   4  565.09   31.13
  -3   1  -5   93.80    6.52
   3  -1   5   81.54    6.57
   3  -1   5   90.83    8.35
  -3   1  -5   81.86    6.42
  -2   5  -5  221.89   19.70
   2  -5   5  179.23   19.00
  -2   5  -5  216.13   17.80
   2  -5   5  205.60   13.96
   2  -5   5  180.54   35.45
  -2   5  -5  219.04   15.58
   3   3   3   69.89    5.52
  -3  -3  -3   75.95    6.51
  -3  -3  -3   63.27    7.55
   3   3   3   66.49    8.50
   3   3   3   58.01    8.70
  -1   5  -6   22.41    5.17
   1  -5   6   19.82    7.33
   1  -5   6   11.54    4.20
   1  -5   6   20.34    3.31
   1  -5   6   19.21   10.81
  -1   5  -6   22.93    4.78
  -1   5  -6   22.64    4.14
   2   6   0   76.89    8.17
  -2  -6   0   61.67    4.31
   2   6   0   71.91   10.28
   2   6   0   69.50   17.10
  -2  -6   0   74.85   11.33
   2   6   0   69.71    5.32
   3   4  -1  103.33   11.34
  -3  -4   1   86.03   10.39
  -3  -4   1   98.69    6.73
   3   4  -1   96.14    8.56
   3   4  -1   89.85    9.90
  -1  -7  -1    1.15    2.28
   1   7   1    0.73    1.78
   1   7   1    1.09    1.84
   1   7   1    3.71    5.80
   0  -1   8   79.72   12.53
   0  -1   8  106.64   10.90
   0  -1   8   92.78   11.49
  -2   7   0  170.99   28.65
  -2   7   0  172.90   11.78
  -2   7   0  138.13   15.86
   2  -7   0  184.14   43.48
   2  -7   0  180.97   16.37
   3   0   5  160.21    9.59
   3   0   5  141.38    9.92
   3   0   5  136.42    8.95
   3   0   5  148.96   11.27
  -3   0  -5  134.38    8.84
   0  -7  -3   17.52    3.06
  -2  -6   1   78.09    4.96
   0   7   3   21.34   15.64
   2   6  -1   74.00    8.71
   0  -7  -3   23.17    4.52
   2   6  -1   82.08    7.29
   0   7   3   26.14    3.82
   0   7   3   23.19    7.08
  -2  -6   1   78.03   12.44
   2   6  -1   62.74   12.98
  -1   6  -5    2.49    4.26
   1  -6   5    5.71    2.59
  -1   6  -5    8.31    3.81
   1  -6   5    4.12    9.68
   1  -6   5    5.76    5.03
  -1   6  -5    7.01    2.97
   1  -6   5    7.31    2.11
  -3  -4  -1  639.86   46.68
   3   4   1  654.94   87.80
   3   4   1  680.61   40.83
   3   4   1  702.10   47.58
  -3  -4  -1  670.44   39.07
   2   3  -6    0.12    1.43
   2   3  -6    0.20    1.30
  -2  -3   6    0.39    1.63
   3  -2  -5   92.54    5.13
   3  -2  -5  109.61   11.08
   1   6   4   83.07   29.16
  -2  -3   6    0.69    1.19
  -3   2   5   80.51    7.78
  -2  -3   6   -0.64    2.33
  -2  -3   6    0.49    2.28
  -3   2   5   85.67   10.33
  -3   2   5  113.59   11.09
   2   3  -6    0.69    1.29
  -2  -3   6    0.12    1.03
  -3   2   5   96.38    5.55
  -1  -6  -4   71.64    6.26
   1   6   4   69.73    5.31
   0   1   8  538.11   34.32
   0   4  -7  122.17   11.10
   0   1   8  695.10   37.74
   0  -4   7  128.08   18.28
   0  -4   7  103.00   22.52
   0   1   8  596.93   43.59
  -1   7   3   53.28    6.24
  -1   7   3   59.14    9.67
   1  -7  -3   50.92    6.29
  -1   7   3   60.41   19.05
  -1   7   3   55.33    6.45
  -1   7   3   58.55   10.02
  -2   7  -1  145.26   16.76
   2  -7   1  179.81   45.89
   2  -7   1  189.63   17.13
  -3   2  -5   85.10    7.21
   0   5   6  167.19   42.32
   3  -2   5   94.06   19.06
   3  -2   5  102.80    7.18
   3  -2   5   96.75    8.29
  -3   2  -5   71.37    7.46
  -2  -5   4  209.52   21.25
  -2  -5   4  202.95   11.93
   2   5  -4  178.09   14.19
   2   5  -4  207.76   13.12
   2   5  -4  199.13   15.40
  -2  -5   4  188.34   15.11
  -2  -5   4  197.18   19.98
  -2  -6  -1    0.46    0.91
   2   6   1    2.36    2.61
   2   6   1    0.89    1.13
  -2  -6  -1    0.97    2.67
   2   6   1    1.06    5.74
   2   6   1    1.54    1.80
  -2   0   7    4.95    3.45
  -2   0   7    5.17    1.81
   2   0  -7    6.24    2.40
  -2   0   7    1.31    2.31
  -2   5   5    4.17    3.19
  -2   5   5    2.67    3.36
  -2   5   5    1.76    5.13
   2  -5  -5    3.83    2.66
  -2   7   1    0.93    2.02
   2  -7  -1    0.73    2.05
  -2   7   1    0.80    4.79
  -2   7   1    0.27    1.64
   2  -7  -1    1.55    6.28
   2   4   5   66.76    5.10
   2   4   5   64.51    8.30
   2   4   5   21.42   13.70
  -3  -1   5   32.04    6.09
   3   1  -5   32.49    3.88
  -3  -1   5   29.54    5.44
  -3  -1   5   26.09    4.84
  -3  -1   5   23.54    4.40
   3   1  -5   28.58    3.88
  -3  -1   5   29.54    3.45
   3   1  -5   25.88    8.31
  -2   4  -6  370.98   21.82
  -2   4  -6  375.85   27.08
   2  -4   6  406.14   23.09
   2  -4   6  304.41   27.13
  -2   4  -6  437.08   31.36
   2  -4   6  322.22   21.49
  -2   1   7  162.59   10.17
  -2   1   7  139.16   12.30
   2  -1  -7  159.76   11.02
  -2   1   7  166.04   15.04
   3  -4   4  216.66   20.18
   3  -4   4  252.34   15.26
  -3   4  -4  271.39   18.49
  -3   4  -4  266.94   20.66
  -3   4  -4  276.30   21.80
   3  -4   4  223.75   13.46
  -2   6  -4   94.31   10.02
  -2   6  -4   98.07   12.70
   2  -6   4   81.43   11.95
   2  -6   4   75.64    7.43
   2  -6   4   82.83    5.39
  -2   6  -4  114.68   13.34
   1   3   7  405.08   21.06
   1   7  -2   62.08    5.97
  -1  -7   2   62.76    4.88
  -1  -7   2   65.69   11.38
   1   7  -2   67.24    4.80
   1   7  -2   82.72    8.69
  -1  -7   2   71.77   10.47
   1   7  -2   61.82   18.68
   2  -1   7  272.39   16.50
   0   6   5  123.56   37.08
  -1   5   6   18.41    6.84
   2   0   7    3.43    1.78
  -1   5   6   21.95   15.16
  -1   5   6   26.81    6.89
   1  -5  -6   24.10    4.14
   3  -4  -4   37.38    8.50
  -3   4   4   34.48    4.32
  -3   4   4   31.17    6.44
   3   4  -2    2.59    2.18
   3   4  -2    1.03    1.93
  -3  -4   2    3.03    2.81
   0  -2   8  337.59   20.19
   0  -2   8  241.83   27.58
   0  -2   8  199.45   31.04
   2   6  -2   89.06    8.00
  -2  -6   2   92.45   13.69
  -2  -6   2   73.18    7.26
   2   6  -2   95.56    6.58
  -2  -6   2   89.78    5.76
  -2  -6   2   87.59   12.00
   2   1  -7  265.19   15.87
  -2  -1   7  264.43   23.80
  -2  -1   7  214.83   18.19
   3  -5   3    9.64    3.98
   3  -5   3    9.44    2.07
  -3   5  -3   13.26    5.11
   3  -5   3   10.74    1.86
  -2  -1   7  261.63   15.75
  -3   5  -3    9.98    3.82
  -2   4   6  131.32   14.87
   2  -4  -6  138.82   12.61
  -1   6   5  102.19   29.61
  -1   6   5  119.88   11.91
  -1   6   5   97.83   14.97
   1  -6  -5  108.18   11.81
   3   1   5    9.40    2.74
  -3  -1  -5   10.52    3.49
   3   1   5   18.70    2.70
   3   1   5   10.36    4.07
   1  -4   7  352.65   31.42
   1  -4   7  237.54   19.59
   1  -4   7  338.22   38.75
  -1   0   8    1.68    2.13
   1   0  -8   11.77    2.36
  -1   0   8    7.46    2.43
  -1   0   8    6.68    4.01
   1   7   2   10.10   12.03
  -1  -7  -2    9.10    3.36
   1   7   2    8.77    3.92
  -2   6   4   54.17   10.59
  -2   6   4   77.25    6.46
   2   3   6  144.31   11.23
   2  -6  -4   94.72    9.72
  -2   6   4   73.35   24.52
   2   3   6  118.03    7.04
   2  -7   2   39.49    7.18
  -2   7  -2   30.68    7.06
   0   4   7   23.64   17.04
   0   4   7   25.43    4.46
   2   5   4  107.79   30.89
   2   5   4   99.11    8.98
  -2  -5  -4   99.87   10.10
   2   5   4   90.94    5.23
  -2  -5  -4   87.12    6.46
   3   4   2  838.88   56.19
  -3  -4  -2  763.53   55.66
   3   4   2  848.26  114.25
   3   4   2  812.52   49.24
   2  -2   7  188.23   13.08
   1   0   8  568.99   33.56
  -3   5   3  123.38   12.69
   3  -5  -3  134.69   13.35
  -3   5   3  103.65   11.63
   1  -1   8  114.26   16.14
   1  -1   8   91.41    8.40
  -4   1   0  349.22   19.47
  -4   1   0  308.75   23.03
   4  -1   0  309.50   18.27
   4  -1   0  307.25   23.11
  -4   1   0  262.33   21.14
  -2   2   7  170.11   15.41
  -1   1   8  342.62   19.86
  -1   1   8  218.49   16.17
  -1   1   8  257.14   15.01
  -1   1   8  253.34   21.05
  -1  -1   8   22.47    7.67
   0   2   8   -0.24    1.12
  -1  -1   8   26.91    4.33
   1   1  -8   24.58    4.37
   0   2   8    0.42    1.54
   2   6   2  315.73   20.61
   0   2   8    1.43    2.46
   2   6   2  283.82   51.96
  -2  -6  -2  291.11   25.74
   0   2   8    0.78    1.53
   0   2   8    0.42    0.81
  -2  -6  -2  292.69   14.78
   2   6   2  275.45   14.92
  -3  -3   4    6.15    3.90
  -3   3  -5  182.40   12.93
  -3  -3   4    9.52    3.13
  -3  -3   4   10.35    4.40
   3   3  -4   10.17    3.51
  -3  -3   4   10.39    3.40
   3   3  -4    9.23    2.80
  -3   3  -5  191.13   13.51
   3   3  -4    7.36    3.19
   3  -3   5  198.78   12.59
   2  -7  -2    5.90    3.34
  -1  -5   6   18.46    3.79
   1   5  -6   34.98    4.75
  -2   7   2    6.61    4.29
  -2   7   2    2.08    8.32
  -1  -5   6   26.52    8.95
   1   5  -6   26.43    3.89
  -2   7   2    5.21    3.10
   2   1   7  178.17   10.16
   2   1   7  160.61    9.87
   0  -7   4  347.76   57.97
   0   7  -4  426.39   23.87
   0  -7   4  305.73   23.22
   0  -7   4  377.18   22.12
   0  -7   4  397.91   35.67
   3  -3  -5    3.44    2.40
  -3   3   5    1.91    2.41
  -3   3   5    0.79    1.22
  -4   1   1  162.26    9.42
  -4   1   1  134.12   11.08
  -4   1   1  139.85   12.79
  -4   1   1  118.52   15.86
   4  -1  -1  138.45    9.49
   4  -1  -1  121.13    9.25
   3  -6   0   45.37    7.96
  -3   6   0   43.90    7.36
  -3   6   0   33.26    5.85
   3  -6   0   25.39   19.95
  -4   0   0  158.91   13.95
   4   0   0  175.05   11.24
  -4   0   0  134.10   12.81
  -4   1  -1  398.45   28.20
  -4   1  -1  345.09   27.81
   4  -1   1  380.23   30.62
   4  -1   1  305.26   38.82
   4  -1   1  415.22   23.30
  -4   2   0   51.09    6.75
  -4   2   0   47.48    4.70
   4  -2   0   52.66    5.59
  -4   2   0   40.96    8.17
   4  -2   0   40.94    4.62
  -4   2   0   48.64    7.34
   4  -2   0   47.77    7.05
  -1   4   7   41.00    6.14
  -1   7  -4   11.17    4.62
  -1   4   7   31.83    7.20
   1  -7   4    9.09    3.72
  -1   4   7   31.66   22.79
   1  -7   4   11.39    5.56
   1  -7   4   12.14    2.22
   1  -4  -7   41.27    5.80
   3  -6   1   40.74    7.57
   1   1   8    7.01    2.01
  -3   6  -1   41.66    7.87
   4   0  -1  194.30   12.88
  -4   0   1  157.16   15.61
  -4   0   1  187.87   15.61
   4  -2  -1    1.23    1.33
  -4   2   1   -0.11    1.81
  -4   2   1    0.71    2.64
   4  -2  -1    0.87    1.07
  -4   2   1    0.14    1.02
  -4   2   1    0.41    1.77
   3   2  -5  144.43    9.82
   3   2  -5  126.45    9.56
  -3  -2   5  125.25   13.65
  -3  -2   5  116.89   10.88
  -3  -2   5  112.74   10.60
  -1  -7   3  243.72   12.83
   1   7  -3  296.41   17.05
  -1  -7   3  249.35   22.99
  -1  -7   3  258.22   22.35
   1   7  -3  254.69   14.50
   1   7  -3  215.93   29.90
   4  -2   1  128.34   12.05
  -3   6   1   12.38    3.40
   3  -6  -1   10.71   12.67
  -3   6   1   10.18    4.28
  -4   0  -1   23.51    5.03
  -4   2  -1  138.00   12.69
   4  -2   1  140.40    8.64
  -4   2  -1  141.35   10.45
  -4   0  -1   29.27    5.54
   4   0   1   32.16    3.93
   3  -6  -1   13.71    4.68
  -4   2  -1  104.30    9.60
   4  -2   1   95.85   17.48
   1  -2   8   24.76    4.23
   1  -2   8   11.40    8.35
   1  -2   8   14.38    6.65
  -1  -6   5   49.41    7.65
   1   6  -5   53.74    6.74
  -1  -6   5   55.15   11.90
   1   6  -5   54.71    6.10
   3   3   4   52.03    4.73
  -3  -3  -4   42.50    6.06
   3   3   4   51.66    5.59
  -1  -4   7   91.06   15.79
   1   4  -7   90.44    9.37
  -2  -2   7   70.04   11.76
  -1   8   0    0.59    2.24
   1  -8   0    0.86    1.97
  -1   8   0    0.67    1.48
  -2  -2   7   56.60    5.46
   2   2  -7   72.85    6.81
  -1   8   0   -1.92    5.66
   0  -8   0    5.78    2.95
   0   8   0   12.33    5.68
   0  -8   0   10.90    3.19
   0   8   0    8.92    8.85
   0   8   0    3.70    2.93
  -3  -4   3   82.37   10.66
  -3  -4   3   73.83    9.15
  -3  -4   3   77.14   10.44
   3   4  -3   80.80    7.59
  -1   2   8    0.37    1.36
  -1   2   8    0.27    1.51
  -1   2   8   -0.09    0.94
   2   6  -3  128.25   11.95
   2   6  -3  145.04    9.53
  -2  -6   3  141.79   17.38
  -2  -6   3  142.43   15.25
  -2  -6   3  118.84   13.63
   0   7   4  168.98   40.13
   0  -7  -4  120.90    8.77
   0   7   4  131.52    8.68
   0  -8   1   76.22    8.77
   0   8  -1   95.67   22.72
   0  -8   1   98.84   10.55
   0   8  -1   76.45    6.69
  -1   8  -1   41.28   18.38
   1  -8   1   36.76    7.40
  -1   8  -1   49.97    6.05
  -4   1   2  119.78   17.31
   4  -1  -2  136.61   11.37
  -4   1   2  142.17   13.24
   4  -1  -2  147.50   10.56
  -4   1   2  145.48   13.07
  -4   1   2  173.03    9.84
   2  -3   7    0.81    1.41
   2  -3   7   -0.56    1.88
   1   2  -8  483.95   31.15
  -1  -2   8  477.65   44.69
   0  -3   8    3.14    4.09
   0  -3   8    1.80    1.95
  -1   7   4    1.01    2.37
  -1   7   4    0.04    2.42
  -1   7   4    0.40    1.18
   1  -7  -4    0.66    1.51
  -1   7   4   -0.35    1.60
  -1   7   4   -0.13    5.24
   1   5   6  225.76   54.22
  -2   7  -3   47.22    8.39
   2  -7   3   45.99    9.18
   4  -1   2    9.55    2.59
   4  -1   2    9.98    3.34
  -4   1  -2   10.11    3.62
   4  -1   2    9.52    6.65
  -3  -2  -5   83.55    7.07
   3   2   5   89.11    6.60
   3   2   5   83.34    8.61
   3   2   5  108.46   11.94
  -1   8   1   37.06    6.97
   1  -8  -1   26.32    5.89
  -1   8   1   31.91    6.46
  -1   8   1   26.78   17.28
  -4  -1   0    0.97    1.99
   4   1   0    0.88    1.52
  -4  -1   0    0.42    2.04
   0  -8  -1   17.57    3.97
   0   8   1   18.01    3.63
   0   8   1   16.89    7.46
   0   8   1   24.08   12.55
   0  -8  -1   11.25    4.93
  -1  -7  -3   11.25    3.12
   1   7   3   19.96    4.40
   1   7   3   14.14   16.04
  -4   3   0  119.98   16.16
   4  -3   0   96.66   21.85
  -4   3   0  143.02   13.76
   4  -3   0  143.60   14.18
  -4   3   0  146.73   18.78
  -4   3   0  158.20    9.79
   4  -3   0  135.28    9.81
   4  -3   0  133.05   10.64
   3  -6   2    2.05    2.86
  -3   6  -2    2.18    2.78
  -4   0   2   -0.50    2.15
  -4   0   2    0.03    1.18
  -4   0   2    0.14    1.57
  -4   0   2   -0.14    1.24
   4   0  -2    0.74    1.21
  -2   3   7   10.33    4.22
   2  -3  -7   11.62    4.31
   3   4   3  116.90   26.95
  -3  -4  -3  112.38   11.13
   3   4   3  116.97    8.10
   4  -2  -2  120.48   10.56
   4  -2  -2  122.98    8.59
  -4   2   2  134.33    8.09
  -4   2   2  106.38   14.69
  -4   2   2  139.91   13.75
  -4   2   2  122.86   11.70
  -4  -1   1   14.08    5.05
  -4  -1   1   14.78    4.72
   4   1  -1   19.11    3.92
   2   4  -6  129.63    9.70
  -2  -4   6  142.45   18.09
  -2  -4   6  123.77   12.50
   2   4  -6  143.87   11.13
  -4   2  -2   56.84    6.34
  -4   2  -2   78.81    8.91
   4  -2   2   85.36    6.16
   4  -2   2   63.84   15.15
   4  -2   2   64.17    6.97
  -4   0  -2   76.94    8.90
   4   0   2   62.41   12.42
   4   0   2   84.15    6.88
  -3   6   2    3.06    2.52
   3  -6  -2    3.61    3.07
   3  -6  -2    0.45    6.44
  -3   6   2    1.33    3.30
  -2  -5   5  119.88   14.91
   2   5  -5  125.74    9.88
  -2  -5   5  123.85   17.17
   2   5  -5  110.84    8.83
  -3   1   6   44.24    7.33
   3  -1  -6   47.84    4.06
   2   2   7  231.47   16.13
   2   2   7  279.21   14.39
  -3   1   6   53.27    3.93
   4   1   1  162.18   11.54
  -4  -1  -1  146.01   14.03
  -4   3  -1  266.03   21.44
   4  -3   1  215.11   15.14
  -4   3   1   64.57   11.13
  -4   3  -1  280.40   23.86
  -4   3  -1  362.25   18.88
   4  -3   1  262.47   14.88
   4  -3  -1   68.56    6.45
   4  -3   1  251.96   20.21
  -4   3  -1  218.06   16.93
   4  -3   1  197.90   32.41
  -4   3   1   79.06    9.12
  -4   3   1   84.45   10.31
   4  -3  -1   68.48    9.80
  -4   3   1   77.51    5.30
   0  -6   6  133.19   39.92
   0   6  -6  187.43   13.64
   0  -6   6  187.00   23.05
   0  -6   6  120.21    9.78
   0   6  -6  173.88   12.92
  -3   5  -4   48.82    6.81
   3  -5   4   45.56    4.37
  -3   0   6  188.73   17.17
  -3   0   6  254.28   21.80
   3   0  -6  224.29   13.28
   3  -5   4   40.43    4.17
  -3   5  -4   56.15    8.79
   3  -5   4   32.23    7.03
   2   6   3  374.55   21.89
   2   6   3  447.12   73.33
   2   6   3  438.69   27.78
  -2  -6  -3  443.74   39.86
  -2   7   3   13.64    6.21
  -2   7   3   26.97    4.62
  -2   7   3   20.26   13.26
   2  -7  -3   28.07    5.62
   1   6   5   44.90   27.13
   2  -5   6   55.48   10.16
   2  -5   6   45.09    6.01
  -2   5  -6   69.50    6.55
  -2   5  -6   61.83    9.00
   1   2   8  158.09   10.56
   1   2   8  175.03    9.47
   0  -8   2   60.43    9.34
   0  -8   2   44.70    7.19
   0   8  -2   54.88   16.54
  -1   8  -2  308.16   21.12
   1  -8   2  232.25   23.59
  -1   8  -2  237.13   38.34
   2  -6   5   83.23   13.19
   2  -6   5   74.48    6.93
   3  -1   6   40.75    4.89
  -2   6  -5  100.63    9.77
   1   4   7   15.22   13.89
   0   5  -7   61.60    7.88
   0  -5   7   62.83   13.70
   0  -5   7   31.78   16.23
   3  -4   5  105.50    8.23
  -3   4  -5  124.26   13.40
   3  -4   5   87.81    9.49
  -3   4  -5  122.70   10.13
   0   3   8  111.88   37.57
   0   3   8   98.08   10.98
  -3  -5   0   44.45    9.36
   3   5   0   37.35    5.43
  -3   5   4   40.45    7.99
  -3   5   4   51.39    5.72
   3  -5  -4   58.46    8.48
   1  -3   8   21.81    8.62
   1  -3   8   28.15    5.17
   1  -6   6    4.08    4.67
  -1   6  -6    4.72    2.51
   1  -6   6    4.13    2.54
  -1   6  -6    1.29    3.51
   3   0   6  625.22   37.60
   3  -4  -5   33.90    6.09
  -3   4   5   14.12    5.95
  -3  -5   1   29.66    8.26
   3   5  -1   28.30    4.94
  -3   2   6   34.38    7.17
   3  -2  -6   47.01    7.91
  -3   2  -6   89.67    7.07
   3  -2   6  123.70    8.39
  -3   2  -6   77.36    6.73
  -1   8   2   30.03   22.75
   1  -8  -2   57.95    8.15
  -1   8   2   61.77   10.27
  -1   8   2   72.64    8.61
   0  -8  -2    1.20    1.64
   0   8   2    1.31    6.10
   0  -8  -2    0.84    1.53
   0   8   2    1.12    2.49
  -4  -1   2   49.11    8.39
   4   1  -2   72.17    9.47
  -4  -1   2   62.08    8.73
   3   5   1    0.55    1.52
   3   5   1    0.51    7.19
  -3  -5  -1    1.87    2.84
  -3  -1   6   10.96    3.95
  -3  -1   6   16.94    5.46
   3   1  -6   17.82    2.93
   3   1  -6   18.06    3.15
  -3  -1   6    8.56    3.60
   1  -5   7    0.63    2.95
   1  -5   7    0.40    1.81
   2  -5  -6   59.67    7.93
  -2   5   6   46.11   10.15
   4  -3   2  138.88   10.30
  -4   3  -2  138.67   12.77
  -2   6   5   24.00    8.68
   4  -3  -2    9.91    3.24
   4  -3   2  110.27   10.50
  -2   6   5   28.97   13.30
   2  -6  -5   46.95    6.95
  -4   3  -2  103.88    8.19
  -4   3   2    5.02    3.88
  -4   3   2    5.76    3.33
   2   4   6  201.03   10.44
   2   4   6  215.01   30.41
   4  -1  -3   93.48    7.32
   4  -1  -3   82.80    9.18
  -4   1   3   78.45    9.10
  -4   1   3   79.57   13.16
  -1  -7   4   69.21    9.82
  -1  -7   4   61.25   12.22
   1   7  -4   65.22    6.23
   4   1   2  132.60    9.88
  -4  -1  -2  115.58   11.94
  -1   3   8    9.03    4.45
   2   5   5   19.01    2.84
  -1   3   8   15.44    4.04
   2   5   5   30.29   18.64
  -3  -3   5    0.82    2.58
  -3  -3   5    0.99    1.79
   3   3  -5    1.32    1.68
  -3  -3   5    1.65    2.93
   4  -1   3   26.18    4.61
  -4   1  -3   28.99    5.29
   4  -1   3   32.20    4.15
   0  -7   5  108.30   15.59
   0   7  -5  115.76    9.30
   0  -7   5   74.99    8.22
   2   3  -7    0.49    2.00
  -2  -3   7   -0.20    2.69
   0   6   6   97.76   35.29
  -3   6  -3    0.61    2.16
   3  -6   3    0.64    2.26
  -4   0   3   32.68    6.20
   4   0  -3   33.65    4.88
  -4   0   3   23.88    8.21
  -4   0   3   35.50    5.64
   1   3  -8   15.11    4.14
  -1  -3   8   14.87    7.77
   3   4  -4   50.89    6.06
  -3  -4   4   53.85   12.65
  -3  -4   4   46.01    9.43
  -4  -2   0  285.58   24.21
   4   2   0  297.84   20.51
   0   5   7   13.98    4.11
   0   5   7   16.44   16.24
  -4   2   3   99.33   14.29
   4  -2  -3  107.03    7.51
  -4   2   3  110.14   10.62
   4  -2  -3  111.75   11.26
  -4   2   3  113.90    7.21
   3   5  -2  320.83   20.76
  -3  -5   2  316.29   31.00
  -2  -6   4   76.59   16.45
  -1   7  -5    6.56    3.47
   1  -7   5    5.04    2.60
   2   6  -4   63.68    8.04
  -2  -6   4   70.89   11.20
   2   6  -4   70.45    6.82
   3   1   6   28.14    3.67
   3   1   6   11.30    5.02
  -1   6   6   40.08   10.14
   1  -6  -6   44.69    7.70
  -1   6   6   41.85   20.39
  -4   4   0  116.31   12.49
   2  -4   7  126.87   10.17
   4  -4   0  108.28   12.99
   4  -4   0   74.89   24.62
   2  -4   7   86.96   13.12
  -4   4   0   87.11   13.11
   4  -2   3   72.62    7.32
   4  -2   3  113.45    7.86
  -4   2  -3  103.37   10.16
  -4   0  -3   79.72    8.76
   4   0   3   83.20    7.32
  -3   6   3   66.84    8.06
  -3   6   3   58.38   10.06
   3  -6  -3   79.91   10.72
   4   2  -1  103.60    9.99
  -4  -2   1   93.73   12.08
   0  -8   3    2.54    3.28
   0  -8   3    1.82    2.34
  -2   7  -4    0.28    2.15
   2  -7   4    0.47    2.64
   2  -7   4    0.52    0.96
  -1   8  -3  131.55   11.25
   1  -8   3  105.94   15.95
   4   2   1  334.76   22.24
  -4  -2  -1  325.21   26.66
  -4   4  -1    2.76    2.22
   4  -4   1    2.50    1.99
   4  -4   1    2.59    2.13
  -4   4  -1    2.77    2.79
   4  -4   1    1.94    1.23
  -4   4   1   72.02   12.87
   4  -4  -1   79.29    9.22
  -4   4   1   81.64   10.31
  -1   5   7   67.26   34.46
   2   7   0  279.82   39.27
   2   7   0  283.47   15.23
  -2  -7   0  328.26   31.44
   1  -5  -7   81.86    8.52
  -1   5   7   76.12   12.61
   3  -3   6  256.90   16.15
  -3   3  -6  220.96   19.41
  -3   3  -6  213.73   14.87
   0  -4   8  202.50   26.09
   0  -4   8  180.79   14.39
  -3  -5  -2  106.25   14.42
   3   5   2  100.49   30.97
   3   5   2  107.12    8.27
   2  -8   0   19.66    6.02
  -2   8   0   20.13    6.38
  -2   8   0   11.68   11.86
  -1  -8   0  118.02   13.43
   1   8   0  110.42   10.05
   1   8   0  101.20   24.27
   3  -3  -6    6.72    3.79
  -3   3   6    3.30    3.64
   3   3   5  444.18   30.76
   3   3   5  555.71   32.77
  -3  -3  -5  443.40   29.20
   2   7  -1  159.01    9.57
   2   7  -1  140.54   28.24
  -2  -7   1  161.98   19.17
  -2   0   8   39.63    6.16
   2   0  -8   59.96    5.61
  -2   0   8   61.27   10.76
   1   7   4  197.84   59.33
   1   7   4  169.04   10.64
  -1  -7  -4  132.95    9.69
   0   0   9   46.92    5.73
   2  -4  -7   68.81    9.21
   0   0   9   75.88   10.46
  -2   4   7   60.19   10.05
   3   4   4   -0.23    0.84
   3   4   4    1.66    2.49
  -3  -4  -4    0.17    1.32
  -1  -8   1   38.53    7.87
  -1  -8   1   33.06    5.99
   1   8  -1   30.33   17.79
  -2   1   8   -0.03    1.03
   2  -1  -8    0.18    0.95
  -2   1   8    0.18    1.41
  -2   1   8    0.06    1.95
   2  -8   1    1.21    2.89
  -2   8  -1    1.90    3.10
   2   3   7  133.22    8.11
   0  -1   9    1.69    3.35
   0  -1   9    1.13    1.99
   1   3   8    0.09    0.97
   1   3   8   -0.39    2.86
  -4  -1   3  138.37   13.90
  -2  -7  -1  281.18   25.36
   2   7   1  281.88   43.84
  -2  -7  -1  253.10   12.84
  -4  -1   3  135.44   12.44
   4   1  -3  159.27   12.15
   2   7   1  228.63   12.46
  -4  -1   3  119.18   14.63
   2  -1   8   75.79    7.36
  -3  -2   6    2.51    2.81
   3   2  -6    2.67    2.46
   3   2  -6    2.70    2.14
  -3  -2   6    4.54    2.43
  -3  -2   6    1.72    3.92
   0   7   5  247.68   58.05
  -2   8   1    7.74    3.54
   2  -8  -1   10.75    4.85
  -2   8   1   10.75    9.82
  -2   8   1   12.51    4.69
  -2   7   4   11.31    4.16
  -2   7   4    7.71    5.52
   2  -7  -4   16.58    4.59
  -2   7   4   10.79   10.87
  -1  -6   6   63.40    7.26
  -1   8   3   85.53    8.92
  -1  -6   6   80.38   15.73
  -1   8   3   77.99   26.27
   1   6  -6   86.19    8.08
   1  -8  -3   74.02    9.05
  -1   8   3   83.15   12.92
   2   6   4  268.30   57.93
  -2  -6  -4  236.14   23.04
   2   0   8   56.56    5.79
  -1  -5   7  103.69   19.10
   1   8   1  218.11   35.28
   1   5  -7  114.68   11.42
  -1  -8  -1  185.59   15.75
   0   8   3  167.59   15.13
   0  -8  -3  112.88    9.53
   0   8   3  161.77   37.74
   0  -8  -3  153.42   10.91
   1  -7  -5    6.84    4.18
  -1   7   5    7.55    5.38
  -1   7   5    7.54   10.80
  -4  -2   2  162.82   16.68
  -4  -2   2  177.22   17.26
   4   2  -2  201.26   15.68
  -4   3   3    6.65    3.11
  -4   3   3    5.51    4.18
   4  -3  -3    8.87    3.55
   4  -3   3  103.87    9.77
  -4   3  -3  100.95   11.33
   0   1   9   55.69   10.70
   0   1   9   70.56    5.65
   2   1  -8  150.75   10.94
  -2  -1   8  102.15    9.37
  -2  -1   8  152.65   18.76
   1  -4   8   74.81    8.62
   1  -4   8   73.18   14.92
  -3   7   0    2.80    3.42
   4   1   3  203.59   13.73
   3  -7   0    3.60    3.63
  -4  -1  -3  183.68   16.20
   4  -4   2    0.91    1.79
   4  -4   2    1.45    1.62
  -4   4  -2    2.29    2.50
   4  -4  -2   13.87    4.28
  -4   4   2    9.45    5.14
  -4   4   2   11.32    4.26
  -2  -7   2  122.66   16.52
   2   7  -2  125.55    8.64
  -4  -2  -2    0.83    2.61
   4   2   2    2.57    1.96
  -3   5  -5   15.26    4.36
   3  -5   5   16.97    3.07
   3  -5   5    6.92    4.58
   2  -2   8  155.36   12.02
   3   5  -3  198.00   14.13
  -3  -5   3  205.39   23.22
   0   4   8  134.70   15.49
   0   4   8  141.54   39.17
  -3   7  -1    9.15    4.86
   3  -7   1    9.46    4.87
  -1  -8   2   24.44    5.86
  -1  -8   2   26.64    6.08
   1   8  -2   23.12   10.60
  -2   2   8   73.82    9.69
  -2   2   8  103.76   11.68
  -2   8  -2   15.04    5.99
   2  -8   2   14.36    5.66
  -3   7   1   32.20    6.82
   3  -7  -1   30.57    7.07
  -3   7   1   21.85    4.90
   3   2   6   91.20    7.25
  -4   1   4   17.35    4.59
   4  -1  -4   21.48    3.13
  -4   1   4   21.61    5.87
   0  -2   9  103.48   10.45
   0  -2   9   88.41   16.84
   2   1   8  134.15    9.20
  -3   5   5   29.36    7.84
   3  -5  -5   42.49    7.59
  -1   0   9  118.60   11.64
  -1   0   9   81.66   15.06
  -2  -5   6  119.86   13.20
  -2  -5   6  127.22   19.85
   2   5  -6  135.28   11.28
   2   7   2   76.80   28.61
  -2  -7  -2   80.31   15.01
   3  -6   4    3.63    3.54
  -3   6  -4    4.42    3.24
   3  -6   4    3.82    2.10
  -2   8   2   22.91   18.62
  -2   8   2   48.10    7.71
   2  -8  -2   40.60    7.55
  -2   8   2   35.37    7.32
  -4   1  -4   53.43    7.34
   4  -1   4   59.83    7.75
  -4   0   4   70.12    9.33
   4   0  -4   64.02    7.85
  -4   0   4   52.81    8.15
  -4   0   4   53.72   10.02
  -1   4   8  116.10    8.39
  -1   4   8   78.29   28.90
  -1   4   8   92.65   13.01
   1   8   2   10.56   10.70
  -1  -8  -2    8.24    3.31
   1   0   9  131.34   12.11
   3   5   3  216.67   13.51
  -3  -5  -3  215.46   21.48
   3   5   3  224.75   63.51
   1  -1   9    4.63    2.46
   4  -2  -4  102.45   11.44
  -4   2   4   84.56   11.62
  -4   2   4   86.87   11.52
   2  -6   6   -0.04    1.24
   2  -6   6    0.85    2.35
  -2   6  -6    0.10    1.96
  -1   1   9  113.11   13.38
  -1   1   9   77.20    7.32
  -1   1   9   94.10    8.25
   1   6   6    4.91   13.40
  -3   4  -6   18.34    3.81
  -1  -1   9    0.19    1.47
   3  -4   6   13.65    3.49
  -1  -1   9    4.18    3.29
   1   5   7  157.26   48.56
  -1  -7   5    0.02    3.15
  -1  -7   5    0.18    1.86
   1   7  -5    1.15    1.56
   0  -8   4   12.06    4.49
   4  -2   4  142.92   10.70
   0   8  -4   22.01    3.60
   0  -8   4   22.00    6.98
  -4   2  -4  140.16   12.47
   0   2   9   50.83    6.56
   0   2   9   41.07   17.37
  -1   8  -4   22.89    6.46
   1  -8   4   16.21    7.37
   3  -7   2   37.73    8.53
  -3   7  -2   35.71    8.05
   1   4  -8  245.63   19.31
  -1  -4   8  242.07   31.40
   4   0   4    0.42    1.40
  -4   0  -4    0.76    1.76
  -4  -3   0   67.49   10.87
   4   3   0   67.12    8.50
  -3   6   4   24.43    4.61
   3  -6  -4   33.65    8.87
  -3   6   4   22.37    7.04
   2   2  -8    1.29    1.91
  -2  -2   8    0.64    3.65
  -2  -4   7   73.16   14.26
   2   4  -7   75.67    8.68
  -4   5   0    1.99    2.77
  -4   5   0    2.17    2.86
  -4  -2   3   30.96    7.37
   4  -5   0    1.37    2.53
  -4  -2   3   40.12    7.34
   4   2  -3   47.84    6.23
   0  -6   7   68.28   15.66
   0   6  -7   71.62    8.82
   0   6  -7   63.46    5.13
   3  -4  -6    7.77    3.97
  -3   4   6    3.08    4.07
  -3  -4   5  113.98   16.43
  -3  -4   5  101.97   19.07
   3   4  -5  111.75    9.92
  -3   1   7    1.18    5.06
  -4  -3   1  284.98   27.02
  -3   1   7    9.06    3.82
   3  -1  -7    9.29    2.24
   4   3  -1  301.57   22.68
   3  -7  -2  145.85   16.47
  -3   7   2  107.37   12.59
  -3   7   2  136.94   13.86
   3   0  -7   68.65    6.34
  -3   0   7   51.40    8.05
  -3   0   7   70.74   11.21
  -2  -6   5   73.98   14.25
   2   6  -5   71.91    7.64
  -2  -6   5   74.37   11.69
   2  -3   8   73.73    8.35
   1   1   9   23.71    3.50
   2  -5   7    0.60    2.78
   2  -5   7    0.75    1.70
   2   7  -3   19.75    3.49
  -2  -7   3   20.10    6.96
  -2  -7   3   11.77    5.57
   4   3   1  358.66   25.01
  -4   5  -1   13.48    4.88
   4  -5   1    8.77    4.10
  -4  -3  -1  348.47   29.93
   4  -4   3   43.36    4.46
  -4   4  -3   41.74    7.60
   1  -2   9   36.53    5.89
   1  -2   9   24.25    9.17
  -4   5   1    0.04    2.09
   4  -5  -1    0.99    1.96
  -4   5   1   -0.07    2.04
   3  -1   7   18.93    3.81
  -1  -8   3    6.75    4.34
   1   8  -3    5.37    5.04
  -4   4   3   26.34    5.29
  -1  -8   3    5.42    3.63
   1   8  -3    6.14    2.15
   4  -4  -3   28.97    6.09
  -4   4   3   20.92    6.54
  -4  -1   4  115.34   14.93
  -4  -1   4  126.05   16.45
  -2   7  -5   72.21    9.64
   2  -7   5   60.71   12.39
  -4  -1   4  132.16   13.87
   4   1  -4  152.75   11.16
   2  -7   5   63.95    7.69
  -2   8  -3    9.88    4.98
   2  -8   3    8.04    5.00
  -4  -2  -3  136.41   13.93
   1  -6   7    5.49    2.80
   4   2   3  160.77   11.67
   1  -6   7    5.55    5.36
  -1   6  -7    4.20    3.42
  -2   6   6   16.78    7.19
  -2   6   6    8.14   11.03
   2  -6  -6   28.02    5.53
  -3  -3   6   30.79    5.73
  -3  -3   6   40.55   10.87
  -3  -3   6   56.14   10.66
   3   3  -6   52.00    6.09
   0   7  -6    0.27    1.59
   0  -7   6    0.18    1.55
   0  -7   6    0.32    3.06
  -2   3   8   42.79   12.80
  -2   3   8   68.32    6.65
   2   5   6   99.17   39.51
   3   0   7  423.37   25.78
  -1   2   9   78.48   10.80
  -1   2   9   54.22    7.72
  -1   8   4   25.63    7.01
   1  -8  -4   14.18    4.40
  -1   8   4   12.44   14.85
  -3   2   7   54.66    5.71
  -3   2   7    0.31    3.77
  -4   3   4    9.37    4.43
   4  -3  -4   11.20    4.23
   4  -3   4    2.02    1.73
  -4   3   4    6.21    3.17
  -4   3  -4    1.38    2.34
   0   8   4   77.84   28.53
   2   2   8  333.37   18.72
   3  -2   7   65.18    6.63
  -1   7  -6  102.50   10.46
   1  -7   6   83.72   15.72
  -1  -2   9  127.74   21.26
   1  -7   6   77.29    7.99
   1   2  -9  135.76   12.30
  -3  -6   0  411.77   40.44
   3   6   0  401.86   26.18
   0  -3   9    3.86    4.28
   0  -3   9    5.85    5.62
  -3  -1   7   50.58    9.78
   3   1  -7   69.17    6.66
  -3  -1   7   62.10   12.08
   0  -5   8  289.25   21.00
   0  -5   8  259.41   34.57
   4   3  -2   13.61    4.23
  -4  -3   2    9.37    5.28
   4   1   4  229.79   15.69
  -4  -1  -4  215.74   17.75
  -3  -5   4  160.69   19.87
   3   5  -4  167.29   15.93
  -3  -5   4  168.05   20.89
   1   7   5   67.54   32.96
  -3  -6   1  767.76   70.40
   3   6  -1  754.38   49.01
  -2   5   7   81.96   13.92
   2  -5  -7   93.13   11.10
  -1   9   0    9.50   17.35
  -1   9   0   16.65    5.77
   1  -9   0   10.31    4.86
   1   4   8    1.89    9.73
   3   4   5    1.90    1.60
   3   4   5    4.23    5.24
  -2  -7  -3    1.19    2.44
   2   7   3    2.04   10.87
   2  -8  -3   40.70    7.42
  -2   8   3   35.33    8.41
  -2   8   3   35.90    6.31
  -2   8   3   21.62   18.66
   2   4   7  428.42   22.81
   2   4   7  464.96   55.98
   4  -5   2   56.90    8.05
  -4   5  -2   61.32    9.67
   0   9   0  105.88   26.64
   1   8   3    6.82    9.90
  -1   9  -1    2.55    3.40
   0  -9   0   94.30   12.86
  -1   9  -1    0.62    6.22
  -1  -8  -3    3.32    2.28
   0  -9   0   78.35    9.18
   1  -9   1    1.36    2.82
  -3  -6  -1   73.76   13.22
   3   6   1   63.10   21.97
   3   6   1   65.44    7.03
   3  -7   3   50.42   10.13
  -3   7  -3   60.09   12.91
   4   3   2  122.72   10.67
  -4  -3  -2  116.07   13.93
   4  -5  -2    4.58    3.28
  -2   7   5   60.63   21.37
  -4   5   2    1.51    3.22
  -4   5   2    4.59    3.07
   2  -7  -5   76.01    9.59
  -2   7   5   59.15   12.33
   2   6   5   98.12   41.08
   0  -9   1   21.17    5.12
   0   9  -1   24.57   14.15
   0  -9   1   26.92    5.77
   0   6   7  158.69   15.58
   0   6   7  154.37   45.86
  -1   9   1    8.46   12.98
  -1   9   1    6.11    4.28
   1  -9  -1    8.13    5.48
  -1   9   1   16.18    4.72
   1  -5   8   70.42   15.15
   1  -5   8   70.67    8.73
   3   3   6  302.88   17.72
   1   2   9    0.71    1.09
   3   1   7  304.68   21.80
  -1   6   7   28.71   25.68
   1  -6  -7   36.03    7.80
  -1   6   7   37.14    9.68
   0   3   9   42.45   20.62
   0   3   9   36.93    6.48
   0  -9  -1   32.65    5.48
   0   9   1   46.71   18.05
   0  -9  -1   34.82    5.87
   3  -7  -3   65.95   10.68
  -3   7   3   52.55   10.18
  -3   7   3   58.26   10.69
   1  -3   9  101.51   22.30
   1  -3   9  124.75   14.80
   3   6  -2  126.24   10.25
  -3  -6   2  123.24   19.38
  -2  -3   8   41.79   12.97
   2   3  -8   53.04    6.97
  -3  -5  -4  323.48   34.26
   3   5   4  333.24   19.79
   3   5   4  366.50   68.11
   0   7   6    5.31    6.98
   0   7   6   -0.01    1.81
   3  -3   7   32.20    4.90
  -4   1   5    2.53    1.85
  -4   1   5    2.27    2.21
   4  -1  -5    1.64    1.43
  -4   1   5    3.03    2.98
  -1   7   6   26.93   23.62
  -1   7   6   32.70    9.01
   1  -7  -6   28.11    6.90
  -1   9  -2  114.15   15.22
   1  -9   2   68.06   11.92
   3  -3  -7   91.36   12.35
  -3   3   7   76.16   12.15
  -4  -2   4    9.12    4.46
  -4  -2   4    8.67    4.90
  -4  -2   4    8.22    4.41
   4   2  -4   11.80    3.38
  -3   6  -5   54.10    7.77
   3  -6   5   37.50    8.66
   3  -6   5   44.58    4.89
   2  -4   8   47.04    9.80
   2  -4   8   75.09   10.19
   0  -9   2    0.63    2.03
   0  -9   2    1.01    2.55
   0   9  -2    0.52    4.42
   0   5   8    0.26    2.39
   0   5   8    0.45    6.65
  -4   0   5   68.32   11.78
  -4   0   5   66.34    8.89
  -4   0   5   97.40   12.12
   4   0  -5   89.22    7.00
   3  -5   6   17.80    3.70
  -3   5  -6   19.56    4.28
   3  -5   6    8.27    6.58
  -4   1  -5  142.91   12.55
   4  -1   5  164.39   12.24
  -2  -7   4   10.96    5.55
  -2  -7   4   10.44    5.52
   2   7  -4   11.18    3.17
   3   6   2   30.00   17.13
  -3  -6  -2   20.72    8.23
   3   6   2   24.08    4.16
  -3  -2   7   24.24    8.50
  -3  -2   7   18.25    4.59
   3   2  -7   25.38    4.45
  -1  -6   7    2.01    2.94
   1   6  -7    8.22    3.20
  -1  -6   7    6.68    5.97
  -4  -3   3    7.09    4.61
   4   3  -3    8.05    3.57
  -4   2   5   28.11    6.89
  -4   2   5   22.94    4.69
   4  -2  -5   32.56    6.66
  -1   3   9   42.18    7.56
   0  -8   5    0.80    1.95
   0   8  -5    1.40    1.76
  -1   3   9   31.45    7.03
   0  -8   5    1.06    3.60
   1   8  -4    6.46    2.49
  -1  -8   4    9.19    4.88
  -1  -8   4    6.21    3.80
  -4   4  -4  118.18   12.25
   4  -4   4  104.16    8.71
   1  -8   5   20.95    3.80
  -1   8  -5   30.26    8.60
   1  -8   5   25.51    8.90
   2  -8   4    0.61    2.94
  -2   8  -4    0.82    2.58
   1  -9  -2    0.95    2.23
  -1   9   2    0.70    2.20
  -1   9   2    1.27    6.52
  -1   9   2    0.18    2.54
  -4   2  -5   44.57    6.52
   4  -2   5   52.07    6.05
  -4   4   4   22.97    4.93
   1   3  -9   13.00    4.42
  -4   4   4   25.43    6.93
   4  -4  -4   31.55    6.71
  -1  -3   9   11.28    8.54
  -1   5   8   26.91    7.51
  -1   5   8   27.96   17.35
   4   0   5   68.58    6.60
  -4   0  -5   45.09    6.78
  -4   5  -3  100.08   15.20
   4  -5   3   69.68    9.19
   4  -5   3   87.52    6.39
   3  -6  -5    4.65    3.37
  -4  -2  -4  185.19   20.82
  -3   6   5    1.24    4.19
   4   2   4  239.83   15.94
   0   9   2   13.79   12.05
   0  -9  -2   12.17    3.48
   0  -9  -2    7.16    3.15
   3  -5  -6   35.03    7.75
  -3   5   6   26.64    8.15
   2  -4  -8   78.55   10.46
  -2   4   8   78.09   11.79
   4  -5  -3   40.62    7.65
  -4   5   3   33.50    8.33
  -4   5   3   29.66    7.44
   4   3   3   51.07    6.56
   4   3   3   53.51   12.88
  -4  -3  -3   58.78    8.96
   2   3   8   40.45    4.13
   4   4   0   -0.31    1.68
  -4  -4   0    0.97    2.17
   1   5  -8   15.38    4.95
  -1  -5   8   14.11    9.12
  -1  -7   6    5.13    6.04
   1   7  -6    4.99    2.99
  -1  -7   6    5.21    2.96
   0  -4   9   54.32   12.62
   0  -4   9   25.01    9.24
  -4  -1   5   37.49    8.65
  -4  -1   5   33.01    7.28
   4  -6   0   48.19    9.01
  -4   6   0   50.86    9.77
   4   1  -5   48.92    5.57
  -4  -1   5   49.95    9.18
   4   4  -1  420.24   31.09
  -4  -4   1  374.49   35.67
   3   6  -3  120.15   10.21
  -3  -6   3  113.55   19.01
   3   2   7  185.23   12.16
   2   5  -7   23.82    5.72
  -2  -5   7   24.93   10.18
  -2   0   9   58.98    7.97
  -2   0   9  105.97   16.16
   2   0  -9   95.21    7.97
  -3   7  -4   59.11    9.70
   3  -7   4   44.42   10.13
  -2   8   4    2.16    3.34
   2  -8  -4    1.59    2.70
  -2   8   4    2.23    9.42
  -3  -4   6  108.04   15.77
   3   4  -6  131.54   11.37
  -2  -7  -4    7.86    3.81
  -3  -4   6  130.42   19.43
   2   7   4   14.21   14.63
  -4   6  -1   24.08    7.03
   4   4   1    6.75    3.21
   4  -6   1   21.84    6.42
  -4  -4  -1    4.46    4.24
   3  -8   0   15.54    6.47
  -3   8   0   11.60    5.98
   2   8   0  207.97   34.13
   1  -9   3   97.85   15.84
  -2  -8   0  257.93   25.96
  -1   9  -3  136.63   17.22
  -2  -6   6    1.01    2.36
  -2  -6   6    1.01    3.98
   2   6  -6    1.08    2.13
  -2   1   9   42.97    9.92
  -2   1   9   34.64    8.07
  -4   6   1   39.07    8.10
  -4   6   1   25.58    7.70
   4  -6  -1   41.45    8.16
   1   8   4  115.36   41.60
  -4   3   5    3.19    2.49
   4  -3   5   16.87    3.77
  -4   3   5    5.46    4.04
   4  -3  -5   10.47    4.14
  -4   3  -5   16.13    4.48
   0  -9   3   12.71    5.32
   0  -9   3    7.18    3.83
  -2   9   0   -0.62    6.79
   2  -9   0    2.47    3.13
  -2   9   0    1.91    3.38
   2   8  -1   32.68    3.61
  -2  -8   1   43.07    9.32
   2  -1   9   75.73    7.67
   2  -6   7  138.86   12.05
  -2   6  -7  155.01   12.63
   2  -6   7  151.19   20.55
   1  -8  -5    3.03    2.56
  -1   8   5    0.52    8.84
  -1   8   5    3.49    4.20
  -3  -5   5    6.55    6.00
  -3  -5   5   10.03    5.79
   3   5  -5    8.38    3.30
   1   3   9  143.04   36.88
  -3   8  -1   26.86    8.62
   3  -8   1   35.02    8.55
   1   3   9  135.15   14.07
   0   8   5    0.78    2.88
   0   8   5   49.73   11.64
   3  -4   7    2.86    2.20
   2   0   9  162.91   11.63
   2  -7   6   30.16    9.49
   2  -7   6   33.45    6.44
  -2   7  -6   34.08    6.59
  -2   9  -1    1.39    2.94
   2  -9   1    0.03    2.65
  -4  -1  -5  138.51   16.04
   4   1   5  170.84   15.06
   3  -8  -1   45.45    9.51
  -3   8   1   41.81    9.07
  -2  -1   9   39.44   11.83
   2   1  -9   36.16    5.71
   1   6   7   33.33   28.30
   1  -4   9    5.15    3.29
   1  -4   9    5.06    5.20
  -2  -8  -1   75.06   12.26
   2   8   1   64.06   23.22
  -3   7   4   14.47    3.96
  -3   7   4   10.64    6.14
   3  -7  -4   21.45    5.86
   3   6   3    4.08    9.06
   3   6   3    1.86    1.70
  -3  -6  -3    1.22    4.82
   0   0  10    2.09    1.86
   0   0  10   -0.51    3.73
  -2   9   1   36.98    7.61
   4   4  -2  411.91   35.83
   2  -9  -1   23.95    7.72
  -4  -4   2  392.66   38.75
  -2   9   1   12.14   15.86
  -1  -9   0    7.59    3.76
   1   9   0    9.73    9.34
  -3   4   7    3.25    4.26
   3  -4  -7    6.74    4.30
   2  -2   9    0.52    1.69
   0  -1  10  137.18   11.23
   0  -1  10  106.82   19.48
  -1   9   3    1.46    3.82
   1  -9  -3    4.13    2.79
  -1   9   3    2.11    3.51
  -1   9   3    1.70    8.84
   0   4   9   85.98   12.15
   0   4   9  100.37   44.22
  -1  -9   1    2.05    2.52
  -1  -9   1    1.03    2.22
   1   9  -1    2.26    5.75
   4  -6   2    9.02    4.28
  -4   6  -2    8.60    4.84
  -2   2   9    3.71    3.14
  -2   2   9    4.27    4.02
   2   8  -2    7.46    3.01
  -2  -8   2    8.77    5.39
   0   9   3   94.95    9.62
   0   9   3    0.04    1.68
  -4  -3   4   71.96   12.94
   4   3  -4   89.14    9.07
  -4  -4  -2  120.98   15.09
   4   4   2  139.82   12.33
  -3  -3   7  146.08   25.76
   3   3  -7  149.79   11.72
  -3  -3   7   89.78    9.65
   0   7  -7    1.30    2.13
   3  -8   2    4.29    4.10
   0  -7   7   -0.12    4.18
   0  -7   7    1.07    1.82
  -3   8  -2    3.60    4.12
   1   5   8  385.34   85.98
  -4   6   2    7.40    4.27
  -4   6   2    8.45    4.43
   4  -6  -2   11.21    4.88
   0   1  10  105.71    7.90
  -2  -4   8    1.05    4.71
   2   4  -8    1.80    2.53
   1   7   6  118.51   46.51
   1   9   1   72.48   22.65
  -1  -9  -1   64.37    8.65
   3   4   6   20.56   12.74
   3   4   6   26.98    3.75
   2   1   9   14.21    3.02
  -2   9  -2   23.66    7.97
   2  -9   2   17.10    6.94
   0  -6   8   69.85   17.72
   0  -6   8   71.92    8.51
  -2   6   7   13.71    7.09
   2  -6  -7   16.51    5.16
  -3   1   8   10.17    4.71
  -3   1   8   16.96    6.47
   1  -7   7  203.10   27.44
  -1   7  -7  220.28   17.48
   1  -7   7  200.46   16.17
   2   5   7  148.64   52.49
  -3   0   8   24.72    6.26
  -3   0   8   41.45   10.23
   3   0  -8   37.75    4.66
   3   5   5  287.00   61.00
   3   5   5  235.01   14.22
  -4  -2   5    0.32    2.50
   4   2  -5    2.05    1.89
  -2   7   6   22.17   15.56
  -4  -2   5    0.95    2.52
   2  -7  -6   38.01    7.10
  -4  -2   5    1.68    3.30
  -2   7   6   34.61    9.57
  -1   4   9   12.88    4.92
  -1   4   9   14.17    5.30
   2  -5   8   56.81   11.18
   2  -5   8   61.19    7.86
  -4   5  -4   14.29    4.69
   4  -5   4    9.19    2.66
  -3   8   2   44.12   10.64
  -3   8   2   25.54    9.03
   3  -8  -2   51.72    9.30
   2   6   6  284.01   75.99
  -2  -7   5   64.56   10.58
   2   7  -5   67.87    7.94
  -2  -7   5   63.01   14.46
   2   8   2   49.07   22.48
  -2  -8  -2   40.92    8.98
  -1  -4   9  200.27   31.02
   1   4  -9  204.27   18.76
  -1  -9   2    0.51    2.06
   1   9  -2    0.93    3.40
   3  -1   8   22.70    4.39
  -1  -9   2   -0.07    2.72
   1  -6   8   -0.84    2.80
   1  -6   8    0.12    1.50
  -2   9   2   25.58    6.73
   2  -9  -2   29.66    7.20
  -2   9   2   17.25   16.42
  -2   9   2   40.97    7.28
  -1  -8   5   10.12    6.62
  -1  -8   5    7.67    4.22
   0  -2  10    2.18    2.29
   0  -2  10    1.35    4.68
   1   8  -5   13.06    3.51
   4  -5  -4  168.09   17.62
  -4   5   4  134.09   15.64
  -4   5   4  108.49   16.20
   2   2  -9   73.83   11.24
  -2  -2   9   79.03   17.30
  -4  -3  -4   62.13    8.64
   4   3   4    9.96   14.08
   4   3   4   62.14    6.83
  -4   4  -5   46.33    7.17
   4  -4   5   38.14    5.51
  -1   0  10    1.17    2.53
  -1   0  10   14.36    5.21
  -2   8  -5   66.63   10.47
   2  -8   5   56.28   12.29
  -3  -6   4    2.79    4.84
   3   6  -4    3.62    2.50
   3   0   8  199.05   13.86
  -4   1   6    0.38    2.39
  -4   1   6    1.07    2.76
  -3   2   8    2.50    3.12
  -4   4   5   -0.57    1.99
   4  -4  -5    0.86    2.10
  -3   2   8    3.93    4.22
   2  -3   9   46.14    6.80
   3  -2   8  167.12   12.96
   4   4  -3   74.10    9.00
  -4  -4   3   65.77   12.93
   1   0  10   61.06    6.33
  -3  -1   8   14.02    4.39
   1  -9   4   23.20    9.09
   3  -6   6   98.23   15.59
  -3  -1   8   18.86    8.43
   3  -6   6  145.75   13.51
  -1   9  -4   33.61    8.13
   3   1  -8   20.06    4.06
  -3   6  -6  171.72   14.81
   1  -1  10    0.05    1.26
  -4   0   6   35.62    8.56
  -1   1  10    1.74    1.71
  -1   1  10    5.53    4.19
  -4   0   6   53.70   12.79
   4   0  -6   48.18    5.19
  -1  -1  10  168.43   14.06
  -1  -1  10  147.81   23.87
  -4  -2  -5   69.75    9.37
   4   2   5   92.98   10.28
   0  -9   4   18.51    6.70
   0  -9   4   10.18    4.36
   3   3   7    2.49    1.74
  -1  -9  -2  113.10   11.88
   1   9   2  130.94   31.44
   0  -8   6    1.58    1.55
   0  -8   6    2.58    3.51
   0   8  -6   -0.34    1.52
   4  -1   6  267.63   19.15
   2  -5  -8   20.27    5.71
  -2   5   8   16.30    6.82
   1  -8   6    2.90    2.39
   1  -8   6    5.16    5.10
  -1   8  -6    6.21    3.51
  -2  -8   3   10.05    5.56
   2   8  -3   12.33    3.89
  -4   2   6    0.27    2.03
  -4   2   6    0.15    1.39
  -4   6  -3    2.44    3.19
   4  -6   3    1.81    3.68
  -3  -7   0   10.54    6.34
   3   7   0    7.15    2.65
  -2   3   9   58.36    9.59
  -2   3   9   83.32   15.04
   2   4   8  349.17   70.96
   3  -8   3    0.97    2.73
  -3   8  -3    0.11    2.62
  -4   2  -6   52.95    7.08
   4  -2   6   67.68    7.37
  -3  -7   1  228.32   27.80
   2  -9   3    9.34    5.92
  -2   9  -3   12.72    5.88
   3   7  -1  201.98   16.91
   0   7   7   23.02    8.90
   0   7   7   15.73   20.76
  -3   7  -5   26.93    6.31
   3  -7   5   17.65    7.37
  -4   6   3    0.90    2.23
  -4   6   3    0.87    1.99
   4  -6  -3   -0.61    2.44
   0  -5   9    0.88    3.01
   0  -5   9    0.43    3.96
   2   2   9  319.27   18.60
  -4  -4  -3  164.47   18.30
   4   4   3  166.09   13.32
   4   4   3  148.83   42.16
  -1   7   7   16.12    7.45
  -1   7   7   31.46   15.25
   4   0   6    1.17    1.82
   0   6   8   90.88   36.50
   0   6   8   88.34   15.48
   1   1  10   72.90    8.00
  -3   6   6   38.98   11.74
   3  -6  -6   58.49    9.88
   1  -2  10  293.32   21.94
   3  -5   7   50.53    6.26
  -2   8   5   -0.15    5.74
  -2   8   5    0.82    2.95
   2  -8  -5    0.64    2.10
   3   6   4   20.49    3.55
   3   6   4   23.92   21.28
  -3  -6  -4   19.22    6.79
   3   7   1   62.68    6.34
   2   7   5  136.85   50.55
  -3  -7  -1   63.75   13.68
   3   1   8    7.93    2.72
  -1   6   8    7.53    5.35
  -1   6   8    9.56   11.55
   1   4   9   13.05    5.57
  -5   1   0  178.93   19.39
   5  -1   0  188.21   14.70
   1   4   9   37.46   19.08
  -5   1   0  139.90   16.03
  -1  -9   3   32.72   10.60
  -1  -9   3   32.08    7.14
   1   8   5    6.94   15.35
  -3   8   3    6.07    3.32
   3  -8  -3    5.19    4.25
  -3   8   3    2.64    3.57
  -4  -1   6   14.26    5.64
  -4  -1   6   26.98    7.95
  -4  -1   6   20.23    6.55
   4   1  -6   28.63    4.35
   1  -9  -4    4.79    3.06
  -1   9   4    3.21   10.72
  -1   9   4    5.46    4.60
   3  -3   8    1.81    2.09
  -5   2   0   27.13    7.04
   5  -2   0   24.27    4.47
  -5   2   0   25.64    5.71
  -1   2  10   42.76    7.24
  -1   2  10   58.39   14.28
  -1  -2  10    6.27    2.92
  -1  -2  10    6.38    6.50
   0  -3  10    5.57    3.38
   0  -3  10    8.78    6.73
   5  -1  -1   38.25    6.05
  -5   1   1   39.07    8.31
  -5   1   1   34.13    7.44
   2   8   3   58.36   26.61
  -2  -8  -3   57.98    8.93
   1  -5   9    2.77    3.86
   1  -5   9    0.73    2.40
  -2   9   3   33.29    8.53
  -2   9   3   45.18    8.93
   2  -9  -3   37.29    7.79
  -2   9   3   18.77   19.75
  -3   3   8   20.91    7.89
  -3   3   8   40.08    5.87
   5  -1   1  113.63   10.47
  -5   1  -1  102.27   13.37
   0   9   4   -0.21    1.46
   0   9   4    1.53    5.01
  -3  -7   2   12.61    7.34
   3   7  -2   10.79    3.22
   4   5   0   33.08    6.56
  -4  -5   0   39.31   10.95
  -3   7   5    9.43    7.14
   3  -7  -5   20.24    6.00
  -3   5   7   21.59    9.23
   3  -5  -7   45.04    8.61
  -5   2   1   45.81    8.38
  -5   2   1   35.71    7.39
   5  -2  -1   43.26    5.68
  -1  -6   8    5.55    7.10
   1   6  -8    6.72    3.99
  -5   0   0    1.04    2.95
   5   0   0    1.13    2.07
  -3  -2   8    1.10    3.99
  -3  -2   8    0.57    1.86
   3   2  -8    1.55    2.03
  -3  -5   6   18.58    8.34
  -3  -5   6   27.57   13.63
  -5   2  -1    2.86    3.54
   5  -2   1    4.10    2.97
   3   5  -6   29.95    5.56
  -4   3   6   60.43   12.40
   4  -3  -6   85.77   12.22
  -1  -7   7    9.73    6.77
  -1  -7   7    3.43    2.47
   1   7  -7    8.69    3.36
  -4   3  -6   59.33    7.62
   4  -3   6   75.80    7.78
  -4  -5   1    7.42    6.54
   4   5  -1    8.90    3.78
   4  -7   0    4.05    4.68
  -4   7   0    9.77    4.85
  -2  -3   9   75.24   18.22
   2   3  -9   75.35    9.59
  -4  -3   5   55.38   11.91
  -1   8   6    2.59    8.81
   4   3  -5   61.35    7.08
  -4  -3   5   43.42    8.59
   1  -8  -6    3.09    2.50
  -1   8   6    4.57    4.55
  -4  -3   5   52.53   11.58
  -5   0   1   -0.16    2.19
  -5   0   1    0.41    1.93
   5   0  -1    0.17    1.57
   0   8   6   36.43   27.26
   0   8   6   43.54    7.60
   4  -7   1    4.42    4.21
  -4   7  -1    5.66    4.45
   4   5   1   12.81    4.37
  -4  -5  -1   13.37    7.33
   4   1   6   21.62    4.15
   5   0   1   44.25    6.80
  -5   0  -1   39.98    8.76
  -3  -4   7   43.51   13.29
   3   4  -7   45.03    6.84
  -2  -6   7   10.29    5.45
   2   6  -7   24.60    5.11
  -2  -6   7   16.93    9.63
  -1  -9  -3   35.70    6.86
   1   9   3   50.82   22.27
  -4   7   1    5.31    4.85
   4  -7  -1    8.90    4.94
  -3  -7  -2   56.81   11.27
   3   7   2   39.83    4.98
   2  -4   9   55.68    8.13
   3   7   2   57.35   22.43
  -5   3   0   16.93    4.73
  -5   3   0   22.08    6.01
   5  -3   0   18.00    3.51
  -1  10   0   16.97    7.40
  -1  10   0    8.98   11.27
   1 -10   0    8.11    4.74
   4   4  -4  201.82   16.04
  -4  -4   4  177.99   24.34
   1   2  10    2.03    1.41
   1   2  10   -0.08    5.07
   0   5   9   13.69    6.07
   0   5   9   16.62   17.52
   5  -1  -2    2.45    2.80
  -5   1   2    1.96    2.89
  -5   1   2    1.35    2.97
  -4   5  -5   36.69    7.06
   4  -5   5   30.44    4.64
   0   3  10   11.87    4.32
   0   3  10   17.10   14.85
   1  -3  10   37.46   10.59
   1  -3  10   47.43    7.21
   1 -10   1    0.13    2.40
  -1  10  -1    0.79    2.71
  -1  10  -1    1.05    5.03
  -2   7  -7   40.89    6.57
   2  -7   7   39.22   11.14
   2  -7   7   38.76    5.85
  -5   1  -2   -0.16    1.82
   5  -1   2   -0.08    1.32
   5  -2  -2   18.61    3.69
  -5   2   2   14.31    5.64
  -5   3   1    1.20    2.63
  -5   3   1    1.81    2.79
  -5   2   2   16.05    6.54
   4   5  -2   24.16    5.32
  -4  -5   2   30.77    9.73
  -2  -8   4   46.14   10.04
  -2  -8   4   58.69   10.53
   2   8  -4   56.77    6.70
  -5   3  -1    0.84    2.90
   5  -3   1    2.40    2.26
   0 -10   0    1.84    2.45
   0  10   0    2.05    7.01
   2   5  -8    7.25    4.04
  -2  -5   8    6.79    7.25
   0 -10   0    1.11    2.76
   5  -2   2   11.52    3.20
  -5   2  -2    5.23    4.54
  -3  -6   5  102.40   21.93
  -3  -6   5   99.89   15.79
   3   6  -5  106.72   10.76
   4  -5  -5   28.25    7.42
  -4   5   5   17.44    7.06
   4  -6   4    6.54    4.20
  -4   6  -4   14.83    5.14
  -1   5   9   17.28    6.54
  -1  10   1   23.55   25.87
  -1  10   1   32.93    7.72
   1 -10  -1   29.01    7.48
   3   2   8   22.33    3.79
   0 -10   1   -0.21    1.88
   0 -10   1    0.41    1.70
   0  10  -1   -0.31    3.80
  -3   8  -4    5.78    4.40
   3  -8   4    4.79    4.65
  -5   0   2    6.32    4.42
  -5   0   2    4.22    4.70
   5   0  -2    9.38    3.38
   2  -9   4    0.91    3.15
  -2   9  -4    1.17    3.00
   4   3   5   -1.89    6.85
  -2   4   9    1.61    3.12
   5   1   0   28.62    5.89
   4   3   5    6.32    2.56
  -4  -3  -5    4.38    3.47
  -2   4   9    1.05    2.79
  -5  -1   0   24.06    7.36
   4  -7   2    1.58    2.87
  -4   7  -2    0.88    3.06
  -4  -2   6   17.25    5.77
  -4  -2   6   28.15   11.73
  -4  -2   6   17.64    7.00
   4   2  -6   29.23    4.65
  -1   9  -5   35.37    8.22
   1  -9   5   27.37   10.17
   2  -6   8   27.31    9.53
   2  -6   8   33.21    5.80
  -3  -7   3   29.11    9.45
   3   7  -3   19.26    4.24
  -1  -5   9   -0.23    4.10
   1   5  -9    0.52    2.21
  -2  -7   6    4.79    3.04
  -2  -7   6    3.38    5.49
   2   7  -6    3.32    2.94
   0  -9   5    2.62    2.61
   0   9  -5   -0.49    1.33
  -5   0  -2   53.57    9.88
   5   0   2   56.54    7.56
  -4  -5  -2   14.68    8.10
   4   5   2    8.14    3.59
  -4   6   4    1.03    2.10
  -4   6   4    1.51    2.81
   4  -6  -4    1.37    3.03
   0 -10  -1   39.86    7.08
   0  10   1   45.18   21.91
   0  10   1   44.90    5.99
   3   5   6   15.63    2.99
   3   5   6   24.33   20.70
  -5  -1   1  137.29   17.94
   2   3   9    0.29    1.02
  -1   3  10   20.31    6.54
  -1   3  10   16.35    5.12
   5   1  -1  147.68   14.47
   2   3   9    0.62    4.38
  -1  -8   6   70.35   14.80
  -1  -8   6   57.18    8.07
   1   8  -6   76.09    8.44
   3  -4   8    2.21    2.96
  -4   7   2   29.06    7.84
   4  -7  -2   49.79    9.77
  -4   7   2   43.98    8.61
  -4  -4  -4  158.04   17.83
  -1  -3  10   54.75   16.88
   4   4   4  189.09   47.84
  -1  -3  10   60.57    8.05
   4   4   4  186.34   13.91
  -1  10  -2    3.64    4.24
   1 -10   2    2.65    3.70
  -1  -9   4   62.24   11.02
  -1  -9   4   50.20    8.27
  -5  -1  -1   47.33    9.67
   5   1   1   49.59    7.56
  -2   8  -6   16.52    5.41
   2  -8   6   13.15    7.60
  -4   4  -6   24.29    4.98
   4  -4   6   18.48    4.27
   1   6   8  117.38   14.88
   1   6   8   -0.54    2.91
   1   7   7    0.10    7.23
  -5   3   2    0.32    3.99
  -5   3   2    1.37    2.62
   5  -3  -2    1.46    2.26
   3   4   7  366.49   75.34
   3   4   7  382.71   22.59
  -3   8   4   10.20    6.29
   3  -8  -4   12.72    5.49
   5  -3   2   51.07    6.03
  -5   3  -2   51.42    8.96
   0  10  -2   20.72   11.55
   0 -10   2   21.78    6.12
   0 -10   2   16.43    6.55
  -3   4   8   12.55    4.16
  -3   4   8   -0.11    2.60
  -4   4   6    0.07    2.58
   4  -4  -6    0.85    2.62
   3  -9   0   23.89    7.80
  -3   9   0   28.30    8.30
   2  -7  -7    6.64    3.74
  -2   7   7    4.38    5.40
   0  -4  10   70.31   14.55
   0  -4  10   35.91    8.36
   2   8   4  115.67   42.41
   0  -7   8   53.85   16.36
   0  -7   8   83.07   12.75
  -2   9   4   11.65   17.26
  -2   9   4   29.06    8.28
   2  -9  -4   29.47    6.86
  -1  10   2   55.47   10.73
  -1  10   2   27.44   24.07
   1 -10  -2   40.91    7.67
   2   6   7    5.50   16.59
  -1  10   2   38.43    8.75
  -3  -3   8    1.69    8.76
   3   3  -8   16.98    4.50
  -3   9  -1    2.89    4.12
   3  -9   1    2.54    4.19
  -5   1   3   -0.03    2.42
  -5   1   3    0.73    2.13
   5  -1  -3    0.32    1.28
  -5   4   0   39.21    6.64
  -5   4   0   62.32    9.43
  -3  -7  -3  155.52   18.92
   3   7   3  173.84   46.61
   4   2   6  220.73   15.79
  -2   0  10   44.91    6.11
  -2   0  10    0.03    2.04
  -5  -1   2  180.60   22.12
   5   1  -2  223.30   18.77
   3   6   5   95.58   42.51
  -4  -5   3  222.63   31.10
   4   5  -3  238.16   18.56
  -3   9   1    9.78    5.08
   3  -9  -1    7.60    5.36
   1  -7   8   22.20    5.07
   1  -7   8   19.21    9.46
  -5   2   3    5.78    3.89
  -5   2   3    7.53    6.61
  -5   2   3    6.45    2.38
   5  -1   3    5.64    2.71
  -5   1  -3    3.78    3.70
  -2   6   8    0.60    3.51
   2  -6  -8    2.28    2.77
  -4   1   7    9.97    5.27
  -4   1   7   18.96    6.76
  -2   1  10    5.45    4.70
  -2   1  10   17.77    6.88
  -5   4  -1   20.00    6.21
  -5   4   1   76.62   10.51
  -5   4   1   53.06    9.75
   5  -4  -1   56.38    8.29
   0  10   2    1.28   12.59
   0  10   2    2.03    2.49
   0  10   2    4.63    2.08
   3  -7   6    0.32    2.70
   3  -7   6    0.64    1.33
  -3   7  -6    0.78    2.24
  -1   9   5   76.44   12.87
  -1   9   5   35.01   25.92
   1  -9  -5   52.51    7.62
   3  -6   7    0.93    2.11
  -3   6  -7    0.40    1.72
   3  -6   7    0.18    2.19
  -5   2  -3   68.87   10.25
   5  -2   3   69.17    7.67
   5   1   2   36.07    5.97
  -5  -1  -2   26.13    8.01
   2   5   8   13.77   21.33
   2  -1  10   91.99    9.10
  -5   0   3   21.83    6.69
   5   0  -3   24.87    4.45
  -5   0   3   17.79    6.68
  -4   0   7   13.48    6.10
  -4   0   7   24.25    8.20
   4   0  -7   22.62    3.63
   1   3  10  118.78   42.74
   0  -8   7   16.89    9.06
   0  -8   7   19.53    6.73
   0   8  -7   20.37    5.60
   4  -7   3   21.01    6.69
  -4   7  -3   24.01    7.29
   2   0  10  103.49    8.90
   1  -8   7    0.05    2.96
  -2  -4   9   23.37   12.40
  -1   8  -7   -0.07    2.34
   2   4  -9   29.33    6.48
   1  -8   7    0.37    1.46
   1   9   4   83.95   30.93
   0   9   5    7.67    3.76
   0   9   5    3.68   11.91
   2   9   0  211.20   44.11
  -2  -1  10   -0.13    2.14
  -2  -1  10   37.05    6.26
  -2  -9   0  233.27   24.62
   1  -4  10   12.39    4.34
   1  -4  10    9.42    7.14
   4  -1   7   70.03    7.78
  -2   8   6    3.15    8.80
   2  -8  -6    6.20    3.49
  -2   8   6    4.27    5.06
   0  -6   9  134.13   23.74
   0  -6   9  136.90   15.04
  -4   2   7    4.00    4.18
  -4   2   7    1.76    3.35
  -1  10  -3    2.23    4.00
   1 -10   3    2.97    3.65
   1   5   9   88.30   16.55
  -2  -9   1  142.42   18.36
   2   7   6   48.94   34.36
   1   5   9   -0.49    4.62
   3  -9   2    0.78    2.62
  -3   9  -2   -0.13    2.71
  -2  10   0   29.13    7.49
   2 -10   0   13.64    7.17
  -5   0  -3  132.59   20.11
   5   0   3  153.96   13.63
  -3   1   9   55.53   11.75
  -3   1   9   32.54    7.42
   4  -7  -3    1.23    2.82
  -4  -5  -3    0.72    2.76
  -4   7   3    0.44    3.01
   4   5   3    0.20    1.62
  -4   7   3    0.64    2.42
   3   0  -9   29.82    4.60
  -3   0   9   23.29    5.60
  -3   0   9   31.21   10.83
  -5  -2   0   36.40    9.17
   5   2   0   44.86    7.69
   1   8   6   64.57   36.61
   4  -2   7    1.26    1.93
   2  -5   9   13.47    7.45
   2 -10   1   62.25   12.25
   2  -5   9   28.03    5.48
  -2  10  -1   92.38   14.47
   2  -2  10    1.63    2.20
   0 -10   3   19.82    6.62
   0 -10   3   16.38    6.51
  -4  -4   5   13.37    8.98
  -2  -9  -1   10.52    4.65
   4   4  -5   11.05    3.86
   2   9   1   19.17   10.77
   0   4  10   31.40   20.18
  -2   2  10    6.05    4.85
   0   4  10   25.91    6.39
  -2   2  10    4.24    3.24
   5   2  -1   29.29    6.35
  -5  -2   1   22.91    8.44
   3   7  -4  114.48   10.65
  -3  -7   4  111.81   17.89
   4   0   7    7.48    2.92
  -5   3   3   20.19   11.04
  -5   3   3   27.50    6.45
   1  -6   9   54.31   13.28
   1  -6   9   55.30    8.29
   5  -3  -3   29.08    6.38
   3  -9  -2    0.31    2.57
  -3   9   2    0.79    2.36
  -3   6   7   19.27    8.62
   3  -6  -7   35.74    7.96
   5  -4   2    5.38    2.18
  -5   4  -2    6.17    4.09
   5  -3   3   42.68    7.48
   2 -10  -1    2.97    3.86
  -5   3  -3   46.16    8.27
  -3   7   6    1.59    4.39
  -2  10   1    4.30    8.85
   3  -7  -6    3.11    3.36
  -2  10   1    8.06    5.42
   5  -4  -2   14.75    4.65
  -5   4   2    8.90    5.15
  -5   4   2   14.94    7.42
   3  -1   9  169.46   13.46
   3   3   8    0.20    4.47
   3   3   8    0.36    1.20
   5   2   1   86.77   10.76
  -5  -2  -1   74.14   12.38
  -2  -8   5   42.57   10.78
   2   8  -5   48.31    6.62
  -2  -8   5   38.40    7.98
  -4  -3   6   28.82    6.76
  -4  -3   6   27.57   11.83
  -4  -3   6   33.01   10.65
   4   3  -6   39.45    5.94
  -4  -1   7    0.58    2.74
  -4  -1   7   -0.28    1.81
   4   1  -7    0.29    1.62
   0   0  11   20.72    3.92
   2   1  10    6.20    2.44
  -2  -9   2   12.55    6.18
   3   0   9   64.71    6.90
  -3   2   9    5.45    3.97
  -3   2   9    8.50    5.51
   5   1  -3   64.69    7.30
  -5  -1   3   48.04   10.34
  -5  -1   3   51.02   10.30
  -4   6  -5    2.24    2.95
   4  -6   5    1.66    2.15
   0  -1  11   25.57   12.48
   0  -1  11   51.62    6.27
   3   1  -9    5.62    2.61
  -3  -1   9    5.49    5.92
  -3  -1   9    2.18    2.63
  -3   8  -5    4.05    3.66
   3  -8   5    2.69    4.18
   3  -2   9   71.95    8.26
  -1  10   3    2.46    3.09
   1 -10  -3    0.93    2.34
  -1  10   3    1.28    2.28
  -1  10   3    1.64    7.93
  -2   9  -5   25.25    6.96
   2  -9   5   15.29    7.71
  -1   4  10    3.65    3.36
   0   7   8   41.93   28.75
   0   7   8   48.38   12.35
   2 -10   2   37.70   14.56
  -2  10  -2   70.34   12.64
   3   5  -7   57.06    8.61
  -1  -4  10  306.52   24.73
  -1  -4  10  275.95   42.17
  -3  -5   7   51.87   15.33
   3  -5   8    9.71    3.44
  -1   7   8   22.96    8.27
  -1   7   8   18.05   15.61
  -1 -10   0    0.34    1.86
   1  10   0    0.96    5.14
  -2  -2  10  165.84   29.92
   2   2 -10  182.41   16.64
   4  -5   6    0.06    1.29
  -4   5  -6    0.27    1.63
  -4   3   7   15.91   11.05
   4  -3   7  115.00   11.14
  -4   3   7   34.05    5.86
   0   1  11    6.73    2.24
  -2   5   9   -0.03    2.72
  -2   5   9    3.05    3.34
   1  10  -1   22.65   11.46
  -1 -10   1   16.22    5.08
  -5  -2   2   61.58   12.35
   5   2  -2   64.22    8.95
  -1  -9   5   11.79    5.23
   1   9  -5   25.62    4.37
  -1  -9   5   18.22    7.67
   0  10   3    4.47    3.20
   0  10   3    5.65   10.41
   0  10   3    4.46    2.93
  -5  -1  -3    4.28    3.77
   5   1   3    4.95    3.02
  -4   6   5    2.84    4.25
   4  -6  -5    6.27    4.27
   3   6  -6   57.14    7.69
  -5   1   4   14.06    6.98
  -5   1   4   13.04    5.68
  -3  -6   6   62.59   14.00
   5  -1  -4   19.81    3.26
  -5   1   4   11.77    7.43
  -3  -6   6   49.19   10.54
   2   4   9    0.09    1.83
   2   4   9   72.32   11.97
  -4  -5   4   12.12    7.43
   4   5  -4   11.95    4.06
   2   9   2    3.04    6.66
  -2  -9  -2    1.34    2.44
  -1   8   7    3.12    4.09
  -1   8   7    0.44    8.06
   2  -3  10  114.54   11.60
   4   4   5  229.40   56.94
   4   4   5  201.79   14.72
  -3   9  -3    5.04    4.47
   3  -9   3    3.57    4.42
   4   6   0  166.29   14.53
  -4  -6   0  158.56   25.37
   4  -5  -6    0.13    2.68
  -4   5   6    0.84    2.73
   5  -5   0    4.98    3.49
  -5   5   0    9.87    4.66
   4   1   7   54.15    6.65
  -2  10   2    0.41    6.55
  -2  10   2    1.52    2.68
   2 -10  -2    1.44    3.78
   1  10   1    1.62    5.15
   0   8   7    8.83    6.31
   0   8   7    5.98   15.03
  -1 -10  -1    0.19    1.70
   3   7   4   60.53   38.27
  -3  -7  -4   45.73    8.46
   1  -9   6   10.61    7.65
  -1   9  -6   13.54    5.46
   5   2   2  138.21   13.50
  -5  -2  -2  117.15   15.60
  -5   2   4    7.48    4.09
  -5   2   4    6.37    6.97
  -5   2   4    5.26    5.17
  -1  -7   8    5.02    7.53
   1   7  -8   12.35    4.62
   4   6  -1   31.50    5.64
  -4  -6   1   31.95   11.27
   0   6   9    9.87    5.84
   0   6   9   10.38   16.17
   0  -9   6    7.98    5.58
   0   9  -6   10.05    4.36
   0  -9   6    3.46    2.97
   5  -1   4    0.73    1.86
  -5   1  -4    1.11    2.35
   4  -8   0    0.72    2.57
  -3   5   8    9.03    6.39
  -4   8   0    0.11    2.69
   0  -2  11   10.42    5.32
   0  -2  11   11.90    7.77
   3  -5  -8   14.55    5.69
  -3  -8   0   13.90    6.19
   3   8   0    6.60    3.11
   4   3   6   60.46    6.48
   4   3   6    8.34   16.54
  -5   0   4   22.94    7.52
  -5   0   4   23.99    7.06
   5   0  -4   35.31    5.94
  -3   8   5    8.65    6.35
   3  -8  -5   12.03    5.11
   3   1   9    5.01    2.45
  -5   5  -1    0.72    2.74
  -5   2  -4   45.88   10.88
   5  -2   4   52.68    6.96
   5  -5  -1   20.14    5.43
  -5   5   1   12.73    6.70
  -5   5   1   22.85    6.61
  -4   7  -4   24.76    6.64
   4  -7   4   12.62    6.63
  -1   0  11   26.10    5.47
  -1   0  11   -0.02    2.03
  -3  -8   1   12.26    6.95
   3   8  -1   10.30    2.78
  -1   6   9    4.30    4.52
  -2   3  10   30.14    7.34
  -2   3  10   43.89    9.28
   4   6   1  116.31   11.70
  -4  -6  -1  113.26   20.17
   4  -8   1    3.37    5.87
  -4   8  -1    5.76    4.75
  -1 -10   2   11.03    4.27
  -1 -10   2   13.84    4.72
   1  10  -2   13.96    8.03
   3  -3   9    0.00    1.21
  -5   4  -3    9.63    4.83
   5  -4   3   10.48    2.85
   3   4  -8    3.67    3.01
  -3  -4   8    2.69    8.04
   1 -10   4    6.92    5.65
  -1  10  -4    8.49    5.31
  -5   4   3    1.34    6.87
   5  -4  -3    4.72    3.52
  -5   4   3    4.02    3.39
  -2  -6   8    8.82    9.04
   2   6  -8   17.73    5.37
   0  -5  10    1.36    3.21
   0  -5  10    5.30    5.42
   2  -9  -5   13.76    4.76
  -2   9   5    9.92    6.31
  -2   9   5   10.78   12.33
  -3   9   3    0.84    3.20
  -4   8   1    0.37    2.26
   4  -8  -1   -0.01    2.50
  -3   9   3    0.82    3.03
   3  -9  -3    1.04    2.83
   2   8   5   23.37   22.41
   1  -1  11   75.11    7.93
   1   0  11   57.64    6.32
   2   9  -3   33.19    4.56
  -2  -9   3   34.99    7.44
  -3   3   9    9.53    5.68
  -3   3   9   22.83    7.31
   2   2  10  162.70   10.05
   2   2  10   -0.15   26.09
  -3  -8  -1   18.17    7.82
  -1  -6   9    0.99    5.32
   1   6  -9    2.28    3.07
  -1  -1  11    0.28    1.76
  -1  -1  11    8.17    4.71
  -4  -2   7   21.01    8.95
  -4  -2   7   13.84    5.20
   4   2  -7   21.89    4.39
  -1   1  11    4.02    5.29
  -5   0  -4  118.76   14.46
   5   0   4  143.87   12.31
   3   2  -9    6.26    3.37
  -3  -2   9    4.76    6.90
  -2  -7   7   10.09    6.07
   2   7  -7   30.90    5.72
  -2  -7   7   19.35   10.04
   0 -10   4    2.48    2.76
   0  10  -4   -0.36    1.64
  -4   7   4    1.06    2.93
  -4   7   4    1.14    2.13
   4  -7  -4    1.32    3.12
   1   8  -7    6.39    3.36
  -1  -8   7    7.92    5.87
  -1  -8   7    3.65    2.62
   2 -10   3    0.79    2.90
  -2  10  -3    0.41    3.03
   2  -7   8    1.74    2.13
   2  -7   8    2.95    4.04
  -4  -6   2   25.21   10.64
   4   6  -2   22.05    6.64
   4   5   4   73.84   34.78
  -4  -5  -4   72.97   13.42
   4   5   4   83.42    8.69
   1   4  10  108.25   15.51
   1   4  10   -0.33    3.83
  -5   3   4   25.40   13.89
  -5   3   4   28.45    6.42
  -2   8  -7    2.16    2.59
   2  -8   7    1.84    1.82
   2  -8   7    2.15    4.14
   3   5   7   49.06   35.56
  -1 -10  -2    0.29    1.54
   1  10   2    0.85    5.53
  -5   3  -4   14.12    5.56
   5  -3   4   21.03    4.27
  -3  -8   2  222.06   26.72
   3   8  -2  183.00   13.21
  -5  -2   3    8.48    5.55
   5   2  -3    8.51    3.58
   1  -5  10    9.88    7.15
   1  -5  10   11.68    4.31
  -5   5  -2    0.51    2.45
  -5  -3   0   47.31   11.36
   5   3   0   56.42    8.73
   4  -4   7    4.04    3.52
   4  -8   2    9.74    5.56
  -4   8  -2   11.52    5.82
   1   9   5    0.10    5.70
  -5   5   2    7.35    9.51
   5  -5  -2   11.68    4.59
  -5   5   2    8.61    4.63
   1   1  11   70.82   19.12
   1   1  11  100.74    7.63
   1  -2  11   22.64    5.15
  -5  -1   4    7.61    4.64
  -5  -1   4    6.81    4.49
   5   1  -4    6.48    2.88
   3   6   6  159.79   75.97
   5   3  -1    1.63    2.63
  -5  -3   1    1.24    4.88
  -4   4   7   -0.41    2.40
  -4   4   7    8.55    3.74
  -4  -6  -2  137.90   21.37
   4   6   2  136.76   12.62
  -2  -3  10   23.24   13.39
   2   3 -10   32.83    6.75
   3   7  -5   25.15    6.66
  -3  -7   5   21.80    8.04
  -4   8   2    2.95    4.46
   4  -8  -2    1.77    3.73
  -1   9   6   15.21   18.76
  -1   9   6   34.07    8.90
  -2  -9  -3   27.07    5.38
   2   9   3   29.37   18.20
   5   3   1    8.12    4.32
  -5  -3  -1    8.92    5.48
  -2  -5   9    1.64    4.75
   2   5  -9    0.76    2.45
   1 -10  -4    1.45    2.25
  -1  10   4    2.21    3.20
  -1  10   4    1.42    8.20
  -5  -2  -3    5.63    4.47
  -2  10   3    0.42    1.72
  -2  10   3    0.18    2.13
  -2  10   3   -0.49    4.89
   5   2   3    6.76    3.40
   2 -10  -3    0.17    1.99
  -1  -2  11   10.06    8.15
  -1  -2  11    9.30    4.04
   0  -3  11   12.51   10.76
   0  -3  11   10.60    4.18
  -1   2  11   13.53    7.53
  -3  -8  -2   68.37   12.13
   3   8   2   49.62   29.30
  -1 -10   3    3.57    3.36
  -1 -10   3    3.30    3.13
   4   2   7  236.63   16.92
   0   9   6   22.55   23.98
   2  -4  10   10.85    4.04
   0   9   6   43.26   11.17
   3   2   9  269.63   17.66
  -3   7  -7    0.29    1.93
   5   1   4  147.92   12.73
   3  -7   7    0.59    2.51
   3  -9   4   19.31    7.87
  -5  -1  -4  113.61   14.53
  -3   9  -4   23.10    7.45
   3  -7   7    0.76    1.50
   2  -6   9   26.74    9.62
   2  -6   9   38.63    6.10
   0  10   4    1.96    9.19
   1   7   8   26.91    6.14
   0  10   4    2.77    4.26
   1   7   8   48.73   27.71
   3   4   8  102.01    7.60
   3   4   8  120.00   47.85
  -4  -4   6   -0.53    2.93
   4   4  -6    0.41    1.58
  -4  -4   6    0.18    2.57
   0   5  10   45.36   13.46
   0   5  10    0.28    3.14
   3  -4   9   44.64    6.77
  -5  -3   2    0.56    3.34
   5   3  -2    1.52    2.37
   2  -7  -8    1.54    2.68
  -2   7   8    0.89    3.52
  -4  -6   3  169.42   26.91
   4   6  -3  163.15   17.43
   2   8  -6   98.10   10.19
  -2  -8   6   70.27   10.23
  -2  -8   6   85.64   15.69
   2   6   8   73.63   44.79
   3   8  -3  118.13   10.17
  -1   5  10   33.88    8.10
  -3  -8   3  137.95   18.86
  -2   8   7   10.34    6.44
  -2   8   7    3.54   12.92
   2  -8  -7   11.35    4.61
  -4  -5   5   14.38    7.85
   4   5  -5   14.89    4.44
  -5   1   5   11.96    6.39
  -5   1   5    8.56    5.66
  -5   1   5    6.18    3.97
  -4   1   8   12.70    4.77
  -4   1   8   -0.38    6.70
   1   6   9   36.33   13.04
   1   6   9   -0.02    3.68
   2   9  -4   11.66    3.15
  -1  -5  10    9.71    8.97
  -1  -5  10   10.62    4.36
  -2  -9   4   11.35    5.07
   2   7   7  159.06   60.20
  -5   4  -4    0.00    2.67
   5  -4   4   -0.39    1.34
   2  -9   6   38.38   10.85
  -4   6  -6    5.03    3.17
   4  -6   6    3.11    2.15
  -2   9  -6   40.74    8.61
  -2   4  10    2.14    2.83
   3  -8   6    1.74    3.55
  -2   4  10   -0.19    4.04
  -5   4   4    5.58    3.90
  -5   4   4   10.39   10.07
  -5  -3  -2   76.43   13.71
   5   3   2   99.95   11.44
   3  -6   8    1.83    2.09
   5  -4  -4   12.71    4.80
   1   2  11   17.27   18.20
  -3   4   9    0.19    2.43
  -5   5  -3    4.01    3.80
  -3   4   9   -0.28    2.05
   1  -3  11    0.24    1.68
   4  -8   3    4.67    5.60
  -4   8  -3    5.10    4.56
   0  -8   8    7.11    3.69
   0  -8   8    4.50    6.44
  -4   0   8    2.23    3.47
  -4   0   8    5.48    5.57
   4   0  -8    4.64    2.25
   0  -7   9   57.39    9.14
   0  -7   9   45.13   14.67
   1   8   7    0.53    3.65
   1   8   7  121.66   16.48
  -5   2   5    4.59    4.28
  -1 -10  -3    1.56    1.87
   1  10   3    1.82    7.42
  -5   2   5    0.44    2.74
  -5   2   5   -0.13    2.05
   1  -8   8   10.73    6.76
   5  -5  -3    5.34    4.10
  -5   5   3    4.94    3.64
   1  -8   8    8.37    3.60
  -5   5   3    7.24    8.05
  -3   9   4    0.69    2.67
   3   3  -9    1.63    2.46
  -3  -3   9    0.62    4.90
   3  -9  -4    1.08    2.69
   2 -10   4   -0.46    2.68
  -2  10  -4   -0.23    2.62
   2   3  10   -1.15    8.71
   3   7   5   -2.66   11.46
   1   9  -6    0.55    1.44
  -1  -9   6   -0.34    1.46
  -5   6   0    4.85    4.44
   5  -6   0    4.85    4.68
  -5   0   5   10.95    5.77
   5   0  -5   22.85    3.62
  -5   0   5   13.78    6.00
  -5   0   5   13.79    6.52
   5  -1   5    7.87    3.26
  -5   1  -5    5.25    3.74
  -4  -3   7   73.60   21.52
   4   3  -7   74.80    8.79
  -3   7   7    0.26    3.62
   3  -7  -7    2.52    3.10
   4  -7   5    4.83    4.68
  -4   2   8    2.84    3.54
  -4   2   8    0.10    2.79
  -4   7  -5   11.48    4.73
   1  -7   9   13.55    7.86
   1  -7   9   15.93    4.81
   4  -1   8   67.78    8.01
  -5   2  -5    7.48    3.93
   5  -2   5    8.64    3.37
   1 -10   5   12.43    7.13
  -1  10  -5   17.31    6.29
   4   6   3   65.77    8.03
  -4  -6  -3   70.84   14.34
  -4   8   3    4.74    3.47
  -4   8   3    2.43    5.13
   4  -8  -3    6.27    4.46
  -5  -2   4    2.62    3.47
   5   2  -4    2.19    2.24
   4  -6  -6    1.49    4.06
  -4   6   6    0.58    3.18
  -5   6  -1   15.68    5.91
   5  -6   1    8.00    4.32
  -1  11   0    1.05    5.27
   1 -11   0    0.47    2.40
  -1  11   0    0.33    2.57
  -2   6   9    9.39    4.60
  -2   6   9   -0.03    3.57
  -5   6   1    1.01    2.84
   5  -6  -1    0.94    2.55
   4  -2   8    4.65    2.79
  -1  11  -1   14.36    5.54
   1 -11   1    5.14    4.75
   0  10  -5   11.93    5.56
   0 -10   5    7.69    6.10
   4   4   6    6.20    2.64
   4   4   6    6.11   19.46
  -1  -3  11    0.07    3.11
  -1  -3  11   -0.06    1.63
  -3  -8  -3   77.29   12.28
   3   8   3   78.19   29.34
   2   5   9  142.10   15.19
   2   5   9    0.03    2.38
  -1   3  11    4.86    4.05
   4   0   8  103.30    9.73
  -3  10   0    3.22    3.65
   3 -10   0    1.01    3.44
  -5   0  -5    5.47    3.85
   5   0   5    8.77    3.28
   4  -5   7    7.29    3.10
   3  -6  -8   20.77    6.58
  -3   6   8   11.40    7.27
  -4  -1   8    4.95    5.70
   4   1  -8    4.76    2.45
  -5  -3   3   63.75   14.12
  -4  -1   8    2.09    3.25
   5   3  -3   73.57    8.81
  -4   7   5    0.22    2.53
   4  -7  -5    0.34    2.42
  -3  -6   7   44.36   11.10
  -3  -6   7   61.23   15.10
   3   6  -7   63.96    8.76
   1 -11  -1   19.06    6.13
  -1  11   1   14.10   16.19
  -1  11   1   35.51    7.12
  -3   8   6    3.81    4.68
   3 -10   1    1.04    3.43
   3  -8  -6    6.07    3.98
  -3  10  -1    2.73    3.81
   0  11   0    2.01    1.93
   0 -11   0    0.27    2.31
   0  11   0    0.70    5.95
  -1 -10   4    1.59    4.47
  -5   3   5   29.32    4.54
  -1 -10   4    2.05    2.55
  -5   3   5   12.08   12.16
  -5   3   5    6.68    4.79
   4   5   5   56.52    8.67
   4   5   5   58.64   32.44
  -5   3  -5   25.28    5.77
   5  -3   5   20.57    4.67
   0 -11   1    0.84    2.81
   0  11  -1    0.80    6.01
   0  11  -1    3.19    2.27
  -1   9  -7   13.27    4.38
  -5  -2  -4   17.47    6.44
   1  -9   7    7.31    3.02
   1  -9   7   13.54    7.11
   5   2   4   25.51    5.32
   2   9   4   72.71   28.30
  -2  10   4    0.96    8.13
  -2  10   4    4.42    3.99
   2 -10  -4    4.25    3.48
   0  -4  11    3.91    3.37
  -3  10   1    1.21    2.57
   3 -10  -1   -0.10    2.65
   0  -4  11    7.55    6.19
  -3  -5   8    0.99    9.67
   3   5  -8   19.03    4.93
  -4   5   7    0.10    2.66
   0  -9   7   22.20    4.90
   4  -5  -7   -0.07    1.93
   0   9  -7   20.58    7.76
   0  -9   7   15.75    8.64
   2  -9  -6    1.26    2.31
  -2   9   6    1.46    5.81
  -2   9   6    0.68    3.29
  -5  -1   5    0.51    2.46
   5   1  -5    0.85    1.61
  -5  -1   5    0.55    2.51
   2   4 -10    3.14    3.32
  -2  -4  10    3.04    6.47
  -5   6  -2   14.91    6.28
   2   8   6    1.99   11.20
   1 -11   2    0.50    1.79
  -1  11  -2   -0.65    2.07
   0  -6  10   68.92    9.47
   0  -6  10   72.52   17.41
  -4   3   8    1.41    3.49
   4  -3   8   94.46    9.81
  -4   3   8    3.15    4.15
   0  11   1   13.58    5.54
   0  11   1    9.17   13.24
  -5   6   2    5.23    4.47
  -5   6   2    0.90    3.12
   5  -6  -2    2.01    3.17
  -2   0  11    7.33    7.04
   5   3   3   96.72   10.64
  -5  -3  -3   77.00   13.09
  -4  -6   4   12.44    8.15
   4   6  -4   13.85    4.20
   4   3   7   14.77   12.85
   3   3   9    7.94    3.26
   3   3   9   12.41    9.87
   4   3   7   25.26    4.22
   1   5  10   39.60   30.40
  -3   1  10   53.13   12.09
  -3   0  10    0.94    2.03
  -3   1  10   28.29    6.23
  -3   0  10    4.80    4.88
  -2   1  11   68.98   16.10
   2  -5  10    5.40    3.17
   5   4   0   49.16    8.36
  -5  -4   0   41.02   11.80
  -3  -8   4    1.99    3.89
   3   8  -4    1.96    2.10
  -3  10  -2    0.00    2.46
   3 -10   2   -0.24    2.45
  -1  10   5   -0.69    5.53
  -1  10   5    0.33    2.23
   2  -1  11    3.71    2.42
   1  -6  10    2.13    2.48
   1  -6  10    1.45    4.20
  -3   9  -5   11.21    5.02
   3  -9   5    5.94    5.66
  -1   8   8   10.92   11.83
   0  11  -2   23.94    4.91
   0 -11   2   13.04    6.01
  -1   8   8   12.69    6.67
   5   4  -1   84.75   10.84
  -5  -4   1   70.92   15.36
   4   1   8   33.21    5.21
   3  -5   9   44.05    6.62
  -3  -7   6   50.40   11.67
  -3  -7   6   44.08    9.40
   3   7  -6   56.42    7.78
   0   8   8   -1.43    7.81
   0   8   8   -4.56    6.71
   0   8   8    2.22    3.22
   1   3  11   25.38   21.81
  -2  -1  11   94.28   21.14
   0   7   9   31.79    9.72
   0   7   9   44.00   22.17
   1  -4  11    0.05    1.95
   1  -4  11    1.53    2.89
   2   0  11   83.86    7.70
  -4   8  -4    8.50    4.54
   4  -8   4    2.94    4.23
   1   9   6    0.19    2.09
   1   9   6    6.31    8.18
  -1  11   2    1.51    6.76
   1 -11  -2    0.65    2.14
  -5  -1  -5   82.20   12.42
   5   1   5  119.64   11.23
   3  -1  10   50.70    8.35
  -5   5  -4   16.95    5.84
  -1   7   9   20.95    7.78
  -1   7   9   18.42   16.55
   5  -5   4   15.76    3.26
   5   4   1   14.30    5.40
  -5  -4  -1   22.36    7.64
   0  10   5    1.13    3.84
   0  10   5    4.63    8.18
   5  -5  -4    3.62    3.50
  -5   5   4    1.14    6.53
  -5   5   4    2.55    2.66
   3 -10  -2    3.01    3.70
  -3   2  10   10.81    6.36
  -3   2  10    5.48    5.37
   4   7   0   20.09    4.25
  -4  -7   0   27.85   10.02
  -3  -1  10   10.00    8.10
   1  10   4   41.50   22.53
   3   1 -10    8.97    3.52
   3   0  10    2.44    2.09
   3  -2  10   15.04    4.14
  -1  -7   9   13.20    4.17
  -1  -7   9    8.38    8.39
  -2  -9   5    4.53    5.06
  -2  -9   5    2.72    4.34
   2   9  -5    3.67    2.47
   2   7  -8   46.61   10.22
  -2  -7   8   37.50   14.00
  -4  -2   8    8.96    5.47
  -4  -2   8    1.26    3.59
   4   2  -8    2.98    2.63
  -2 -10   0    4.72    3.37
   2  10   0    1.66    7.00
  -4  -7   1    6.39    6.30
   4   7  -1    4.99    2.67
  -2   2  11    0.66    2.42
  -1  -8   8    4.43    3.91
  -1  -8   8   -0.04    1.83
   0  11   2    1.69    3.81
   0  11   2   -0.22    7.63
  -4   9   0    9.51    5.70
  -2 -10   1   21.71    6.12
   4  -9   0   10.33    7.47
  -5   4  -5    9.46    4.55
   5  -4   5   11.69    3.45
   4  -8  -4    7.03    4.66
  -4   8   4    4.20    4.18
   2 -11   0    0.23    2.11
  -2  11   0   -0.68    2.30
  -5   4   5   -7.97    7.90
   5  -4  -5    6.43    3.69
  -4  -6  -4    0.78    3.44
   4   6   4    1.79    1.95
   4   6   4    2.08    8.97
  -3   5   9    5.70    4.00
  -3   5   9    0.88    3.82
  -5  -4   2   25.49   10.76
   5   4  -2   26.87    5.93
   3   6   7   49.95   36.59
  -2  10  -5    2.41    3.15
   2 -10   5    0.17    3.44
   1 -11   3    0.24    2.48
  -1  11  -3    0.48    2.71
  -2   5  10    0.62    2.48
  -2  11  -1   -0.07    3.63
   2 -11   1    3.79    3.57
   4   7   1   24.99    6.11
  -4  -7  -1   34.07   10.54
   4  -9   1    2.02    3.99
   2  -8   8    1.60    1.81
   2  -8   8    0.22    3.70
  -4   9  -1    4.15    4.19
  -5   6  -3   27.26    7.71
   3   4  -9    3.96    3.28
  -3  -4   9    3.81    6.61
  -2  -6   9   18.37   12.38
   2   6  -9   28.41    6.94
   2   1  11   16.80    4.22
   5   3  -4  115.43   11.65
   3  -9  -5    2.44    3.09
  -5  -3   4  105.39   19.14
  -3   9   5    1.30    3.33
  -1   9   7    8.72   10.75
  -1   9   7    7.20    5.46
   2  10   1    0.45    5.71
  -2 -10  -1    1.48    3.18
   4  -9  -1    7.53    5.63
  -4   9   1    9.87    5.12
   3   8   4   58.97   27.42
   4   5  -6   37.83    6.36
  -4  -5   6   23.54    9.62
   2   4  10   69.65   39.35
   3   5   8    0.00    6.68
  -5   6   3    2.38    2.67
   5  -6  -3    1.88    3.12
  -5   6   3    0.01    5.22
   4  -4   8    3.12    2.49
   5   2  -5   21.97    4.43
  -5  -2   5   13.32    6.71
  -1  -4  11    5.61    4.26
  -1  -4  11   13.12    8.19
  -5   1   6   19.54    6.84
  -5   1   6    9.03    6.53
   2 -11  -1    1.36    2.86
   3 -10   3    1.22    4.38
  -3  10  -3    6.75    4.45
  -5  -4  -2   11.84    5.85
   5   4   2    8.82    4.37
  -2  -2  11   24.11   12.26
  -4  -4   7    4.55    6.75
   4   4  -7    7.54    3.36
   0   9   7   13.06   13.60
   0   9   7   11.27    7.12
   0 -11   3   15.13    6.18
   0  11  -3   21.88    7.21
   2  -7   9    1.57    4.12
   2  -7   9    0.62    2.41
  -4  -7   2   16.95    8.85
   4   7  -2   14.96    3.95
   0   6  10    0.11    5.78
  -4   4   8    5.85    5.20
  -4   4   8    5.67    4.83
  -2 -10   2   69.66   10.67
  -2  -8   7    3.26    3.93
   2   8  -7    9.64    3.74
  -2  -8   7   10.01    6.04
   3   1  10    8.17    2.72
  -5   2   6    2.29    4.10
  -5   2   6    5.35    5.59
   3  -3  10    7.17    4.39
  -5   0   6    8.00    6.51
  -5   0   6    2.57    3.71
   5   0  -6    4.51    2.13
  -1  10  -6    2.08    3.25
   1 -10   6    3.12    4.16
  -2  11  -2    0.08    4.61
   2 -11   2    8.82    5.48
  -4   7  -6    5.51    3.79
   2  -3  11  109.93   11.08
  -1 -10   5    9.92    4.26
  -1 -10   5   17.76    6.54
   5  -1   6  166.80   14.93
  -1  -6  10   54.79    8.02
  -1  -6  10   35.16   15.85
   4  -9   2    2.01    3.97
  -4   9  -2    3.84    4.03
   3   7   6    8.01   16.63
  -3   3  10   11.59    4.99
  -1  11   3    2.54    3.98
   5  -2   6    0.27    1.43
   1 -11  -3    8.51    3.40
  -5   2  -6   -0.10    1.55
  -1  11   3   13.13   11.34
   4   2   8    6.34    2.68
  -3  -2  10   28.33   12.97
  -2   9  -7    3.34    3.12
   3  -7   8   13.54    5.82
   2  -9   7    3.45    4.57
   3  -7   8   21.00    3.93
   3   2 -10   31.19    6.26
  -3   8  -7   -0.12    1.92
   3  -8   7   -1.03    2.61
  -5  -3  -4   36.93    9.23
   5   3   4   46.87    7.22
  -4   6  -7    1.61    2.70
   4  -6   7    4.37    2.23
  -5   7   0   -0.26    2.56
   5  -7   0    0.77    2.17
  -3  -9   0   21.92    7.52
   0 -10   6   12.66    6.82
   0  10  -6   11.53    5.22
  -4  -7  -2   39.74   10.85
   4   7   2   33.02    5.23
  -3  10   3   11.43    3.88
  -3  10   3    4.53    4.14
   3 -10  -3   11.89    5.14
  -3  -9   1   37.06    9.44
  -5  -2  -5    5.04    3.79
   5   2   5    8.63    3.19
   5   2   5    2.51    6.76
   1   9  -7    0.43    1.52
  -1  -9   7   -0.28    1.70
  -1  -9   7    8.99    3.64
   4  -9  -2    1.69    3.34
  -4   9   2    1.15    3.89
  -2 -10  -2    2.02    2.57
   5  -7   1    4.09    3.62
   2  10   2    2.24    6.95
  -5   7  -1    5.35    4.48
   2   9   5   39.99   26.67
  -2  10   5    0.81    7.41
   2 -10  -5    3.02    2.85
  -2  10   5    1.65    3.65
  -5  -4   3    1.46    3.92
   5   4  -3    0.85    2.01
  -2   3  11    9.40    5.31
   0  -5  11   -0.15    2.85
   0  -5  11    9.40    4.83
   4   6  -5    1.00    2.01
  -4  -6   5    0.83    3.30
   5  -7  -1    8.42    4.70
  -5   7   1    8.39    5.03
   2 -11  -2    8.36    4.50
   1  11   0   82.00   22.46
  -1 -11   0   68.69    9.28
   5   0   6   25.13    5.26
   0  11   3    3.30    4.15
   0  11   3    9.39    9.98
  -3  -9  -1   17.78    6.65
   1  11  -1    4.07    6.85
  -1 -11   1    6.63    3.53
  -3  -8   5    9.85    5.75
   3   8  -5   13.22    3.95
  -4   7   6    1.74    3.85
   4  -7  -6    2.68    3.64
  -5   3   6    3.34    9.66
  -5   3   6   12.22    5.87
   2   2  11    1.93   10.47
   2   2  11    3.42    1.73
   0  -2  12    2.94    4.84
  -2   8   8   17.19    7.39
   2  -8  -8   17.22    5.48
  -4   6   7    1.01    4.19
   4  -6  -7    5.35    4.09
  -5   3  -6    1.94    2.39
   5  -3   6    2.14    2.22
   4   5   6  112.37    9.60
   4   5   6  134.55   48.37
  -2  -5  10    2.54    4.81
   2   5 -10    0.39    2.46
  -5  -1   6    4.20    5.63
   5   1  -6   14.25    3.38
  -5  -1   6   12.11    5.09
   2   7   8   75.34   42.26
  -5  -1   6   14.29    6.55
   3   4   9   81.39   43.04
   1   7   9    8.06   17.30
  -1   0  12    4.04    5.58
  -4  -7   3   20.10    8.86
   4   7  -3   20.36    4.53
  -1 -11  -1   61.21    9.60
   1  11   1   60.87   23.85
   3   9  -2    0.19    1.20
  -4   8  -5    6.61    4.11
   4  -8   5    3.11    4.16
  -3  -9   2    1.52    2.64
  -2 -10   3    0.35    2.12
   4   3  -8   32.90    6.28
   1   4  11   56.33   31.83
  -1  11  -4   11.55    5.38
   1 -11   4    5.65    5.27
   4   4   7   45.67    5.53
   4   4   7   35.50   30.51
   1   8   8   -0.31    8.03
   1  -5  11   29.92   11.90
   1  -5  11   31.93    6.28
   5  -5   5    7.70    3.70
  -5   5  -5    9.72    4.28
  -5  -4  -3   54.39   13.10
   5   4   3   61.56    8.58
   1   0  12   23.37    3.76
  -3   7   8   -0.96    2.96
   3  -7  -8    1.58    2.45
   5  -7   2    5.12    3.65
  -5   7  -2    8.29    4.80
  -5   6  -4    2.14    3.15
  -1  -1  12    2.82    5.39
   2 -11   3    5.29    4.58
  -2  11  -3    4.11    4.72
  -4   1   9    5.10    4.77
  -4   1   9    0.95    2.79
   2   6   9    8.27   18.62
   5  -5  -5    8.18    4.62
   2  -6  10   13.19    6.65
  -5   5   5   -1.31    8.18
   2  -6  10   25.25    4.88
  -1   1  12    7.04    6.30
  -3   8   7   15.11    8.89
   3  -8  -7   14.61    7.57
  -1 -11   2    1.64    2.46
   3  -6   9    1.76    2.07
   0  -8   9    2.25    4.65
   0  -8   9    2.35    2.53
   3   2  10   42.85    5.96
   3   2  10   -0.13   15.47
  -4   9  -3    7.96    4.90
   4  -9   3    4.31    4.46
  -2  -3  11    8.43    8.44
   3  -9   6    6.56    5.07
  -3   9  -6    7.71    4.45
  -5   7   2    0.71    3.30
   5  -7  -2    4.14    3.48
  -5   7   2    5.06    4.94
   1  -8   9   14.41    5.49
   1  -8   9   16.47    7.87
  -4   0   9    5.27    4.27
  -4   0   9    0.08    2.38
  -3  10  -4    2.71    3.27
   3 -10   4    0.34    3.39
   0  11  -4    7.71    4.98
   0 -11   4    5.71    4.42
   5  -6  -4   16.64    7.01
  -5   6   4    6.98    3.76
  -5   6   4    9.27    9.12
   3  -4  10   24.46    5.03
   1  10   5   39.73   10.82
   1  10   5    1.07    3.27
  -1  10   6    2.45    3.03
  -1  10   6   -5.92    6.79
   4  -5   8   13.46    3.73
   3   6  -8    0.00    1.98
  -3  -6   8    1.28    3.56
  -2   9   7    0.80    3.72
  -2   9   7    5.65    7.90
   2  -9  -7    2.94    3.65
  -3  -9  -2    3.54    3.76
  -4   2   9   13.10    6.56
   2   8   7   21.59   24.00
  -4   2   9    5.40    4.24
  -4   8   5    5.02    4.80
   4  -8  -5    8.26    4.77
   2  -4  11    1.48    2.24
   5   1   6   13.00    3.77
   4  -1   9   11.00    3.67
   4   6   5   30.78   27.09
   4   6   5   41.28    5.53
   5   3  -5    8.45    3.25
  -5  -3   5    3.55    5.80
   4   7   3   31.40    4.72
  -4  -7  -3   34.95    8.90
   1  -9   8   55.99   13.28
   1  -9   8   51.91    6.26
   1   1  12    1.87    1.90
   5   5   0  153.56   14.91
  -2  -9   6    2.32    2.37
  -2  -9   6   -0.14    1.56
   2   9  -6   -0.70    1.97
  -5  -5   0  135.23   24.43
  -4   9   3    0.77    1.85
  -4   9   3    0.27    2.24
   4  -9  -3   -0.88    2.24
   0  -9   8    3.35    4.46
   0  -9   8    2.06    2.21
   0  10   6   -0.87    9.33
   0  -7  10   29.65    6.03
   0  -7  10   18.60   10.97
   0  10   6   -4.04    4.61
   4  -2   9   14.12    4.02
   1   6  10    8.19   16.34
   3   7  -7    3.21    2.54
  -3  -7   7    2.68    4.20
   1  11   2   15.11    6.41
   1  11   2   -0.23    1.85
  -3  -7   7    0.98    2.29
   2  10   3   -0.19    5.47
  -3   4  10    2.55    3.28
  -2 -10  -3    0.48    1.53
  -3  -3  10    6.92    8.53
   3   3 -10    8.76    4.04
   5   5  -1   26.88    5.76
  -5  -5   1   27.98   11.19
   2 -11  -3    4.60    3.56
  -2  11   3    0.70    7.94
  -4   5   8    4.19    2.72
  -4   5   8    0.94    4.14
   3   8   5    0.31    7.22
   0  -3  12   12.10    7.65
  -1  -2  12    2.97    5.70
   5  -4   6    8.08    2.96
  -5   4  -6    4.20    3.43
   2 -10   6    4.09    4.44
  -2  10  -6    4.66    3.77
   4   0   9   54.95    6.77
   1  -7  10    1.68    5.63
   1  -7  10    2.68    2.52
  -1  11   4   13.69    9.98
  -5   4   6    7.84    9.06
  -4  -1   9    9.98    6.40
  -5   4   6    5.25    3.02
   4   1  -9    5.87    2.59
  -1  11   4    3.10    3.83
  -4  -1   9    2.39    2.88
   3   9  -3    0.29    1.21
  -3  -9   3   -0.45    2.32
  -5  -5  -1   88.55   18.48
   5   5   1   89.09   10.76
  -3   6   9    9.36    5.81
   5   4  -4    6.95    3.14
  -5  -4   4    4.08    6.03
   1   9   7   13.93    7.19
   1   9   7    0.50   15.05
   3 -10  -4    9.32    4.73
  -3  10   4    9.20    4.46
  -1  -5  11   -0.05    1.96
  -1  -5  11    0.76    3.44
   4   3   8  121.96   41.21
   4   3   8  121.15   11.81
   3   5  -9   54.77    8.83
  -3  -5   9   58.14   22.09
  -2   4  11    4.95    3.60
  -5  -2   6    7.93    7.52
   5   2  -6   27.31    4.51
  -1 -11   3    0.19    1.65
  -1 -11   3    0.18    1.68
  -2   6  10   13.38    5.83
  -3   9   6   -2.03    4.07
   3  -9  -6    2.58    2.65
  -5   7  -3    2.38    4.71
   0  11   4   43.87   23.59
   0  11   4   52.59   11.24
  -5  -5   2   14.56    8.97
   5   5  -2   16.09    4.49
   4   7  -4    4.95    2.81
  -4  -7   4    4.37    5.30
   2   5  10   20.33   25.18
   2   3  11   63.87   34.95
   5   3   5   30.82    5.16
  -5  -3  -5   14.60    7.29
   5   3   5   13.05   19.77
  -4   3   9    4.23    6.02
  -4   3   9    2.77    3.44
  -2 -10   4    3.40    2.90
   4  -3   9   57.21    7.51
   5  -7  -3   -0.33    2.53
  -5   7   3   -0.54    3.66
  -5   7   3    1.40    2.02
   1  10  -6    1.45    2.13
  -1 -10   6    8.65    4.21
  -4  -5   7   20.12   10.97
   4   5  -7   37.14    6.68
  -6   1   0    2.12    3.94
   6  -1   0    3.98    2.72
   6  -2   0   14.19    3.83
  -6   2   0   12.47    5.93
  -2  11  -4    9.30    5.18
   2 -11   4    6.98    5.36
   1   2  12   -1.86    8.62
  -5   1   7   12.08    6.49
  -5   1   7   18.06    7.15
  -5  -4  -4  121.28   18.75
   5   4   4  165.71   14.25
  -3  -9  -3    2.03    3.21
   3   9   3    3.23    8.98
  -4   9  -4    0.70    2.13
   4  -9   4   -1.38    2.70
  -5  -5  -2   32.04   10.96
   5   5   2   35.11    8.81
   6  -1  -1    0.85    2.15
   4   1   9   83.83    7.93
  -6   1   1    4.79    3.38
   6  -2  -1   16.21    3.64
  -6   2   1   16.35    6.36
  -1   8   9   13.03   10.41
   6  -1   1   12.50    4.38
  -6   1  -1   12.87    5.71
  -6   2  -1    4.41    3.59
   6  -2   1    1.96    2.53
   0   8   9    9.06   16.17
  -5   2   7    8.20    7.07
   1 -11   5    0.94    3.86
  -1  11  -5    4.53    3.61
  -5   2   7    8.27    5.39
  -4  -6   6   47.61   10.05
   4   6  -6   60.73    7.87
  -1  10  -7    1.97    2.57
   1 -10   7    0.53    3.61
  -5   0   7    3.17    4.72
  -5   0   7    3.03    3.18
   3   6   8    4.21   15.39
   5   2   6   43.44   31.45
   5   2   6  104.51    9.96
   3   3  10   36.06    4.02
   3   3  10   27.53   29.93
   1  11   3    0.15    1.77
   1  11   3    4.48    5.84
   4  -7   7    4.30    2.71
   3 -11   0    3.74    3.86
  -4   7  -7    4.50    2.94
  -2  -7   9    3.33    4.06
  -3  -8   6    0.61    2.42
   3   8  -6    2.21    2.17
   2   7  -9    0.19    2.52
   6   0   0    3.78    3.04
  -6   0   0    3.94    4.04
  -2  10   6    6.62    6.61
  -2  10   6    1.53    3.91
   2 -10  -6    5.41    3.96
  -4  -2   9    6.81    3.88
  -4  -2   9   19.00    9.26
   4   2  -9   24.55    4.29
   2   9   6    7.90   15.13
  -1  -8   9   20.27    9.23
  -1  -8   9   18.66    7.17
   5  -1   7   75.89    8.58
  -6   3   0    8.68    5.01
  -2  -4  11   10.20    9.25
  -5   6  -5    3.33    3.22
   0 -10   7    3.44    4.24
   3  -5  10   46.73    6.49
   3 -11   1    5.55    4.31
  -1  -3  12   58.11   16.45
   0  10  -7    1.54    2.85
  -1   9   8    0.78    5.80
  -1   9   8    1.56    3.42
  -4  -4   8    0.15    4.32
   4   4  -8    1.35    2.21
   5  -2   7    2.33    2.30
   0  -6  11   24.09    5.55
   0  -6  11   15.85    9.40
   0  11  -5    5.50    4.02
   0 -11   5    3.64    4.35
  -6   0   1   14.17    6.19
   6   0  -1   15.73    5.75
  -2  -8   8   25.55    9.87
   3   7   7   60.65   35.49
   2   8  -8   28.30    6.21
   3 -10   5    0.86    3.73
  -3  10  -5    4.20    3.40
   4  -9  -4   -0.05    2.67
  -4   9   4    1.24    2.56
   4   7   4   88.92    7.53
  -4  -7  -4  110.71   12.46
   4   7   4  127.37   32.63
   2  -8   9    6.79    2.80
  -6   3   1   24.16    7.14
   0   7  10   53.50   24.45
   2  -8   9   10.37    5.06
   6   0   1   10.51    5.39
  -6   0  -1    8.15    5.06
   3 -11  -1    0.31    2.28
   0   9   8   27.11   17.39
   0   9   8   27.90    9.22
  -6   3  -1    3.21    3.46
   6  -3   1    2.71    2.87
   4  -8   6    0.53    2.04
  -5  -5   3    2.02    5.34
   5   5  -3    3.48    3.52
  -4   8  -6    0.72    2.28
  -3  -9   4    4.89    3.71
   3   9  -4    5.11    2.53
   5  -6  -5   10.22    5.68
  -5   6   5   11.93    9.95
   6  -1  -2    8.68    3.06
  -6   1   2   14.30    5.29
   2  -5  11   13.62    3.99
  -6   2   2   19.30    6.64
   2  10   4    5.51    9.84
  -1  -7  10    0.59    2.85
  -1  -7  10    0.20    3.76
   5  -8   0    3.21    3.18
  -5   8   0    0.89    3.55
   5  -5   6   25.36    4.45
  -5   5  -6   24.69    5.83
  -2  11   4    2.62    6.47
   2 -11  -4    3.58    2.76
  -2  11   4    0.96    2.86
   1   5  11   -1.98   10.34
  -4  -8   0   15.44    6.85
   4   8   0    9.35    2.74
   0  -4  12    6.08    5.67
   1  -6  11   -0.04    2.44
   1  -6  11    6.28    3.56
   2  -9   8    7.73    5.53
  -6   2  -2    2.64    4.06
   6  -2   2    5.84    2.97
   1 -12   0    3.99    4.25
   6  -1   2   40.54    6.85
  -6   1  -2   35.07    8.93
   5   0   7    4.28    2.67
   4  -4   9    7.68    3.14
   3  -8   8   27.25    7.64
   3  -8   8   35.70    4.35
   4   8  -1   14.46    4.49
  -4  -8   1   18.27    7.89
  -5   3   7    2.01    3.94
  -5   3   7    3.28    6.02
  -1 -11   4    5.03    3.29
  -1 -11   4    3.73    3.66
   4  -6   8   13.75    3.47
   3   5   9   12.28   21.37
   1 -12   1   11.04    6.79
  -5   5   6   -0.08    1.46
  -5   5   6    2.10    4.22
   4  -7  -7    7.54    5.06
   5  -8   1    3.01    2.90
  -4   7   7    6.55    5.06
  -5   8  -1    0.20    3.56
  -1  -9   8   -5.76    3.62
  -1  -9   8    1.82    2.76
   3 -11   2    3.30    3.26
  -3  11  -2    0.08    3.65
   4 -10   0    2.68    3.34
  -4  10   0    1.02    3.36
  -5  -1   7   15.66    5.61
   5  -3   7   12.55    3.87
   5   1  -7   21.37    4.07
  -5  -1   7   21.08   11.09
   3  -1  11   13.60    3.49
  -5   8   1    4.31    3.48
   5  -8  -1    0.89    3.34
  -5   7  -4    2.24    3.30
  -4   4   9   20.68    6.82
  -3   5  10    6.47    4.45
  -4   4   9    6.85    5.90
  -2  -6  10   18.49   11.22
   2   6 -10   27.22    6.55
   3   4 -10   16.04    5.17
  -3  -4  10   16.54   10.20
   4   5   7   76.82    8.77
   4   5   7   81.58   39.75
  -6   0   2    4.29    4.20
   6   0  -2    3.68    2.46
   4   8   1   58.78    5.66
  -4  -8  -1   78.94   12.53
   4 -10   1   -0.51    2.42
  -4  10  -1    0.04    3.37
   1 -12  -1    1.97    2.49
  -3  -1  11   12.87    9.14
  -5  -4   5    1.41    3.61
   5   4  -5    0.91    2.03
  -3   2  11    1.69    2.23
  -5  -5  -3   17.53    6.88
   5   5   3   10.58    4.26
   1  10   6   28.61    9.73
  -6   3   2    3.88    3.90
   1  10   6   22.89   18.71
  -6   3   2    4.60    3.51
  -5  -3   6    0.13    2.64
   5   3  -6    0.54    1.60
   3   0  11   35.78    4.98
   3  -2  11   12.27    3.60
   3  -7   9   21.71    4.18
   4 -10  -1    4.96    4.75
  -4  10   1    6.69    4.37
   2  -1  12   22.68    5.29
   0  12   0    2.49    6.29
   6  -3   2   14.89    5.00
  -6   3  -2   13.28    7.55
  -5   7   4    3.57    2.67
   6   1   0   36.88    7.12
  -5   7   4    5.15    6.58
  -6  -1   0   35.11    9.14
  -4   8   6    2.29    2.51
   4  -8  -6   -2.99    2.49
   5  -7  -4    5.03    4.13
  -6   0  -2   11.90    5.59
   6   0   2   13.71    4.56
  -1  11   5    2.12    7.21
  -1  11   5    1.14    2.85
   2  -7  10   29.44    4.85
   2  -7  10   22.05    7.10
   1  -4  12    5.85    3.07
   3  -9   7    4.02    3.55
  -3   9  -7    1.85    2.77
  -2  -1  12    1.59    4.84
   3 -11  -2    3.33    4.28
  -3  11   2    1.45    3.51
   4   2   9    7.05    3.40
   4   2   9    3.36    8.54
   0 -12   1    5.43    4.31
   3 -10  -5    3.36    3.99
  -6   4   0    2.35    3.38
  -3  10   5    9.68    4.15
   4   8  -2   93.48    8.66
  -4  -8   2  102.83   16.09
   2   0  12   -1.23   10.60
   2   0  12   26.82    3.74
   4   6   6    9.63   14.51
   4   6   6    6.35    2.43
   1   3  12    2.20    9.35
  -1  12  -2    0.06    4.67
   1 -12   2   11.53    4.19
  -4   6   8    2.81    2.75
  -4   6   8    7.06    4.40
  -6  -1   1   27.47    8.93
   6   1  -1   32.79    6.10
  -4  -7   5   33.96    8.72
   4   7  -5   30.94    5.61
   5  -8   2    1.88    2.87
  -5   8  -2    2.92    3.52
   2  10  -5    0.45    1.45
  -2 -10   5   -0.24    1.95
  -2 -10   5    3.95    3.00
  -2   5  11    0.17    1.86
  -6  -1  -1   26.87   11.04
   6   1   1   29.05    6.43
  -6   4   1    3.14    3.57
  -6   4  -1    3.78    3.72
   0  12   1    3.27    7.03
   2  -2  12   -0.41    1.47
   3   9   4   10.19   11.98
  -1  10   7    9.61    5.64
  -1  10   7   13.28   10.98
   3   8   6    2.01   10.48
   4   4   8   22.05   24.83
   4   4   8   25.43    3.84
  -2  -9   7   -0.22    1.51
   2   9  -7    1.90    1.88
   4 -10   2    4.29    4.05
  -4  10  -2    3.40    4.43
   6  -1  -3   24.75    3.81
  -6   1   3   24.37    6.84
  -5   8   2    5.12    5.14
   5  -8  -2    6.45    5.70
   0  11   5   13.20   16.51
   0  11   5   20.89    7.10
   5   1   7   17.64    4.14
   2   4  11    0.11    6.97
   2 -11   5    3.12    4.70
  -2  11  -5    7.78    4.29
  -6   2   3    7.44    4.38
  -6   2   3    6.75    4.43
  -3   8   8    6.50    5.73
   3  -8  -8   10.62    4.35
   0 -12   2    0.94    1.98
   0  12  -2    0.16    2.62
  -4  -8  -2    9.92    5.39
  -2   8   9    2.47    3.98
  -4   9  -5    4.68    3.53
   4  -9   5    1.94    3.36
  -6   2  -3   11.75    5.56
   6  -2   3   14.56    4.20
  -1  12   2    1.23    4.92
   1 -12  -2    0.40    1.72
   1  11   4   -3.36    6.00
   0   6  11    7.07    9.81
   1  11   4   -0.51    1.95
  -6   1  -3   46.02    9.27
   2 -10   7    0.87    3.21
  -2  10  -7    1.65    2.40
   6  -1   3   49.90    7.37
   4   3  -9    9.17    3.73
  -4  -3   9    9.55    7.70
   3 -11   3   -0.24    3.20
  -3  11  -3    2.41    3.06
   3   1  11    6.96    2.40
   3   1  11    1.11    8.03
   0  10   7    5.76    4.97
   0  10   7    3.69   10.00
   3  -3  11   27.20    5.02
   2   7   9   31.13   28.40
  -4  10   2   12.45    4.61
   4 -10  -2    9.59    5.48
   2   1  12    2.47    2.02
   2   1  12   -3.66    7.95
   5  -4   7    3.53    2.40
  -1  -6  11   15.54    5.49
  -1  -6  11   13.65    8.84
   5   4   5   76.41    8.73
  -6  -1   2   16.12    6.55
   6   1  -2   14.80    4.03
   5   5  -4    1.60    2.17
  -5  -5   4    1.66    4.30
  -5   4   7    0.75    2.69
  -5   4   7   -0.96    4.55
  -2 -11   0    5.69    3.28
  -1  -4  12    0.84    4.22
   1   8   9   -1.56    9.09
  -2   9   8    1.80    3.29
  -3  -2  11    5.37    7.02
  -6   0   3    0.49    2.62
   6   0  -3    0.64    1.41
   5   3   6    9.38    3.28
   5   3   6    6.15   14.51
  -2 -11   1    2.84    2.80
  -3   3  11    1.47    2.40
  -2  -2  12    3.27    5.85
  -3   7   9    2.41    3.79
   2   8   8    5.54   15.00
   3   7  -8   29.15    6.06
  -3  -7   8   20.26    9.22
   2 -12   0    0.41    2.22
  -6   4   2    2.67    2.64
  -6   4   2    1.26    2.97
   5   2  -7   11.71    3.62
  -5  -6   0   -0.04    3.21
   5   6   0   -0.26    1.45
  -6   4  -2   12.18    5.24
  -6   3   3    2.57    3.35
   6   1   2   31.52    6.49
  -6   3   3    4.10    3.30
  -6  -1  -2   24.40    7.87
   2 -12   1    4.11    3.65
  -4  -8   3   47.20   14.65
   4   8  -3   46.01    6.00
   5   6  -1    0.01    1.33
  -5  -6   1    0.41    2.88
  -3  -6   9    0.48    3.61
   3   6  -9    0.58    2.02
  -1  12  -3   -0.12    2.24
   1 -12   3    0.45    2.08
   6  -3   3    9.72    3.16
  -6   3  -3    6.64    4.52
   3  -9  -7   -0.61    1.95
  -3   9   7    0.24    2.29
   0  12   2   15.04   11.48
   3   4  10   42.50   31.82
   4  -5   9    9.98    3.26
  -6   0  -3   15.17    5.98
   6   0   3   22.78    5.34
   1 -11   6   10.94    5.32
  -1  11  -6    8.57    4.67
   2  11   1   12.41    9.67
  -2 -11  -1   13.85    3.92
   1   7  10   37.87   26.10
   3   9  -5    0.27    1.52
  -3  -9   5    0.38    1.84
   2  -3  12   15.89    3.88
   1  10  -7   33.02    6.19
  -1 -10   7   21.75    4.54
  -1 -10   7   22.53   11.08
   3 -11  -3    1.39    2.53
  -3  11   3    0.63    2.43
   1  -9   9   26.37    5.41
   1  -9   9   16.60    8.32
  -2   7  10    3.17    3.54
   5  -8   3    3.38    2.83
  -5   8  -3    2.70    3.70
   2 -12  -1    1.28    2.56
  -5  -6  -1    4.82    5.27
   5   6   1    3.91    2.61
  -4   9   5   -2.01    4.80
   4  -9  -5    4.44    3.28
   0  -8  10    4.20    2.69
   0  -8  10    1.11    4.64
  -4   1  10    2.11    3.86
   0  -9   9   -0.07    1.14
   0  -9   9    0.22    2.19
  -4   1  10    0.29    1.96
   4   7   5   56.27   34.78
   3  -6  10    0.81    2.20
   1  -8  10    2.35    2.13
   1  -8  10    1.85    3.97
  -3 -10   0    5.17    3.60
  -2 -11   2   18.07    5.05
   1   9   8   42.75   20.61
   1   9   8   27.19    9.35
   4 -10   3   -0.44    3.58
  -4  10  -3    6.75    3.80
   1  11  -5   10.75    3.13
   2   6  10   40.10   30.82
  -1 -11   5    7.17    4.74
  -2  -5  11    1.89    5.35
  -4   0  10    0.08    1.62
  -4   0  10    3.45    3.90
  -6  -2   0    7.39    5.47
   6   2   0    9.97    3.97
   0 -11   6    6.64    4.61
  -3 -10   1   11.63    4.81
   0  11  -6    5.53    3.93
  -5   6  -6    3.31    2.71
   5  -6   6    2.83    1.76
   2  10   5    9.54   15.63
  -2  11   5    0.16    2.37
  -2  11   5    7.68    4.73
   2 -11  -5    0.21    1.97
   3 -10   6    3.13    3.98
  -3  10  -6    4.82    3.52
   5   5   4   12.13    3.89
  -5  -5  -4   13.49    6.20
   0  -5  12    0.42    2.21
   0  -5  12    4.18    3.72
   5  -8  -3    1.52    2.71
  -5   8   3    0.77    2.02
  -5   8   3    0.26    3.02
  -4   5   9    2.48    3.60
   0  12  -3   -0.83    2.71
   0 -12   3   -0.86    3.06
  -2  12  -2    0.06    3.37
   2 -12   2    4.39    3.47
  -6   5   0    1.20    2.85
   6   2  -1    1.33    2.17
  -6  -2   1    2.24    3.29
  -5  -6   2   11.33    9.43
   5   6  -2   20.52    4.53
  -5   7  -5    2.79    3.02
   4   6  -7    3.60    2.56
  -4  -6   7    0.85    2.45
  -4   2  10    2.27    3.38
  -4   2  10   11.39    5.76
   4   5  -8   39.83    6.48
  -4  -5   8   20.17   11.13
  -3  -8   7    9.18    4.21
  -3  -8   7   15.91    6.39
   3   8  -7   33.20    5.00
   2  -6  11    2.21    2.88
  -3 -10  -1   20.06    5.22
   6   2   1    9.31    5.07
  -6  -2  -1    4.98    4.83
   4  -1  10   16.25    3.84
  -6  -1   3    0.76    2.26
  -5   6   6    0.18   11.41
   5  -6  -6   13.82    5.48
   6   1  -3    0.06    1.37
  -6   5  -1    7.47    4.60
  -6   5   1    0.25    2.11
  -4  -8  -3   17.15    5.30
   2   2  12    1.49    8.76
  -1  12   3    3.48    7.44
   5   2   7   98.28    9.14
   5   2   7   41.30   31.37
   4   3   9   77.91    6.71
   4   3   9   83.26   38.73
   4 -10  -3    7.14    4.10
  -4  10   3    4.73    2.92
   3   2  11   85.15    6.44
   3   2  11   55.19   32.82
  -6   1   4    4.11    3.58
  -5   1   8    3.32    3.44
  -5   1   8    4.62    4.88
   4  -2  10   31.01    5.31
   3  -4  11    0.11    1.31
   2  11   2   16.29   13.54
  -2 -11  -2   10.92    3.43
  -6   2   4    1.05    2.12
  -6   2   4   -0.24    1.88
  -2  10   7    2.10    6.63
   2 -10  -7    2.79    2.38
  -2  10   7    2.02    3.38
  -3 -10   2    6.57    3.96
  -5   7   5    1.59    7.27
   5  -7  -5    5.23    4.26
   1  -5  12    5.56    2.86
   1  -5  12    5.26    5.11
   2   9   7    2.84    2.68
   2   9   7   -0.15   10.83
  -6   4   3   -0.22    1.72
  -6   4   3    0.39    1.74
   4   1 -10    6.32    2.33
  -4  -1  10    1.65    2.34
  -4  -1  10   13.75    6.23
   2 -12  -2    1.14    2.47
   5   6   2   81.12    8.59
  -5  -6  -2   69.68   14.74
   6  -4   3    7.09    2.44
  -6   4  -3    1.95    4.09
  -3  11  -4    1.26    2.33
   1   4  12   18.11   16.70
   3 -11   4   -0.73    2.57
   1 -10   8    2.90    4.19
  -1  10  -8    3.80    2.62
   4   0  10   17.33    3.75
  -4   8  -7    1.26    2.10
  -5   2   8    9.32    5.42
  -5   2   8    4.58    5.90
   6   1   3    5.48    3.29
  -6  -1  -3    4.24    3.93
  -5   0   8    0.80    2.58
  -5   0   8    4.72    4.17
  -3   6  10    4.10    3.86
   6   2  -2    3.43    2.54
  -6  -2   2    5.20    4.46
  -6   2  -4    2.53    2.68
   6  -2   4    0.74    2.15
   5   4  -6    1.42    1.99
  -5  -4   6    0.91    3.14
   3   5 -10    1.01    2.47
  -3  -5  10    2.60    4.65
  -6   1  -4   56.15   10.05
   6  -1   4   71.57    8.88
   4  -7   8    1.31    2.01
   0  -7  11    0.59    1.93
  -2  -3  12    0.40    3.82
   0  -7  11    0.39    4.19
   0  10  -8    3.58    2.49
   5  -5   7   18.32    3.86
   0 -10   8    7.57    4.25
   0 -10   8    1.99    1.89
  -3  -3  11    4.07    6.41
   6   0  -4    4.07    2.82
  -6   0   4    7.10    3.89
  -2 -11   3    0.05    1.38
   0  12   3    0.36    1.98
   0  12   3    3.74    5.70
  -3   4  11    2.51    2.88
   1  12   0    0.29    3.46
  -1   0  13   19.06    8.21
   5  -1   8   31.00    5.24
   1   6  11   13.43   15.81
   1  -7  11    1.13    1.93
   1  -7  11    1.04    3.13
  -6   5  -2   -0.05    1.77
   5  -2   8    3.31    2.46
   3   9   5   50.57   22.41
  -5   5   7    5.01    5.87
  -6   5   2    2.60    3.44
  -6   5   2    4.32    2.71
  -5   5   7    0.71    3.45
   4   8  -4    2.14    2.03
  -4  -8   4    1.67    3.30
  -6  -2  -2   29.69    8.24
   6   2   2   38.11    6.95
   1 -12   4    0.52    3.11
  -2 -10   6   11.80    4.54
  -2 -10   6    6.60    3.23
   2  10  -6    9.97    2.90
  -1  12  -4    3.14    3.06
   4   7  -6    0.86    1.85
  -4  -7   6    0.07    2.92
  -6   3   4   -2.89    2.24
  -6   3   4    1.34    2.49
  -3 -10  -2   50.39    7.43
  -1  11   6    6.73    7.73
  -4   3  10    1.45    2.70
  -4   3  10    2.56    4.05
  -1  11   6    2.49    3.50
   4  -3  10   -0.10    1.32
   2  -4  12    8.05    3.08
  -2  12  -3    9.83    4.73
   2 -12   3    5.10    4.90
  -3  10   6    4.29    3.25
   3 -10  -6    1.66    2.87
   1  -1  13   26.57    4.72
   3   7   8   71.22   37.50
   5   6  -3   93.18   12.01
  -5  -6   3   87.47   17.69
  -1  -1  13    2.91    4.86
   1   0  13    0.10    1.14
   5   5  -5   21.83    4.71
  -5  -5   5   15.25    8.09
  -6   3  -4    7.47    4.27
   6  -3   4    9.46    3.26
   5   3  -7    0.59    1.70
  -6   0  -4    5.88    4.45
   6   0   4   10.35    3.74
   1  11   5    3.64    4.09
   1  11   5    2.41    8.45
   1  12   1    2.65    7.67
  -5   8  -4   -0.18    2.04
   4   4  -9    0.88    1.82
   2 -11   6   -0.10    3.08
  -4  -4   9   -1.27    3.62
  -2  11  -6    2.32    2.51
   3   6   9    0.83    9.73
  -2  -8   9    2.33    3.14
  -2  -8   9    0.01    1.59
  -2   6  11    6.76    3.99
   5   0   8   64.86    7.35
  -5   3   8   -0.36    4.86
  -5   3   8    4.49    4.14
  -4  10  -4    6.29    4.26
   4 -10   4    5.11    4.10
   3 -11  -4    4.51    2.99
  -3  11   4    1.72    2.58
   1  10   7    5.34   10.53
   1  10   7    4.86    4.90
  -4   8   7   -1.54    3.14
   5   1  -8   22.34    3.74
  -5  -1   8   11.69    4.90
  -5  -1   8   21.23    8.51
  -1   9   9    0.68    5.97
  -1   9   9   -4.47    3.70
  -4   7   8    0.62    2.82
   4   1  10    0.82   20.22
   4   1  10   91.39    7.42
  -3 -10   3    3.86    3.12
   0  12  -4    0.10    2.55
   0  11   6   12.80   12.18
   0  11   6    9.49    4.93
   0 -12   4    1.28    2.32
   4  -9   6    2.74    3.67
  -4   9  -6    2.56    3.01
   1  12  -2   -0.31    1.40
   5  -3   8   38.98    5.58
  -1  -5  12    1.07    4.23
   5  -9   0    1.69    3.02
  -5   9   0    3.10    4.35
   2   5  11   21.33   22.20
   4   6   7   44.99   28.32
  -2  -7  10    1.56    2.22
  -2  -7  10    3.79    4.59
   0   8  10    4.41    7.51
   0   9   9    7.79   10.22
   2  -9   9    4.28    1.82
   2  -9   9    4.29    3.77
  -5   8   4    5.44    6.50
  -1  -8  10    2.23    2.65
  -1  -8  10    2.46    4.19
   5  -8  -4    8.97    4.79
   4   2 -10    1.80    2.33
  -4  -2  10   -1.71    4.30
  -1   5  12    0.11    1.27
   4   5   8   32.61   23.99
   4   5   8   23.44    3.29
  -5   9  -1    2.62    3.46
   5  -9   1    2.03    3.03
   3  -8   9    0.28    1.21
   3  -8   9    2.27    2.56
   2  11   3   13.98   11.52
   6   2  -3    2.68    2.25
  -6  -2   3    4.02    3.85
  -2   4  12    1.93    2.11
   5   4   6   27.18   26.47
   5   4   6   55.51    6.71
   6   1  -4   12.75    3.19
  -6  -1   4   10.96    5.60
   2 -12  -3    2.99    2.73
  -5  -6  -3   72.60   13.32
   5   6   3   75.38   10.11
   3  -9   8    0.79    2.38
  -1  -9   9    5.39    5.01
  -1  -9   9    6.00    3.20
   4  -6   9    4.72    2.27
  -5   9   1   -0.80    2.10
   5  -9  -1    0.22    2.10
   0  -3  13    3.39    3.94
  -1  -2  13   31.82   14.10
   3   8   7    1.13    8.98
   2  -8  10    4.64    2.36
   2  -8  10    6.89    3.85
   6   3   0   43.90    7.04
  -6  -3   0   32.91   11.75
   2   3  12    0.79    7.73
  -3  -9   6    4.34    4.22
   3   9  -6   22.89    3.89
   4 -10  -4    0.18    2.63
  -4  10   4    1.81    2.31
  -1  12   4    0.22    2.31
  -1  12   4   -2.51    4.53
  -6   5  -3    0.34    2.08
  -6  -3   1   27.63   11.23
   6   3  -1   40.66    6.17
  -2  -9   8    9.12    5.19
   1  12   2    1.04    3.20
   1  12   2    2.40    5.77
  -6   4   4    5.09    3.01
  -6   4   4    1.71    2.69
  -6   5   3   -0.62    2.15
  -6   5   3    1.74    2.27
  -6   6   0    2.54    3.35
  -6   5   3    1.97    2.32
  -6   4   4    2.19    2.95
   3   3  11   -1.18   10.32
   3   3  11    1.76    1.20
   6  -4   4    0.86    1.48
  -6   4  -4    0.87    2.32
   5   5   5    2.37    2.18
   6   2   3   91.11   10.39
  -6  -2  -3   63.73   12.29
   4  -4  10    0.21    1.34
   3  -5  11    5.66    2.65
   1  11  -6    6.54    3.66
  -1 -11   6    3.97    3.78
   6   3   1   -0.44    1.56
  -6  -3  -1    1.62    2.57
  -2 -11   4    1.22    2.63
  -6  -1  -4    0.29    2.13
   6   1   4    0.57    1.89
  -1  10   8    7.33    4.36
  -1  10   8    4.05    8.14
   3  10   3    3.63    6.01
  -6   6  -1   -1.12    2.81
  -3 -10  -3    3.51    2.05
   4  -9  -6    2.34    3.17
  -4   9   6    1.96    4.52
   5   3   7    4.60   12.83
   5   3   7    6.26    2.59
  -5   9  -2    6.06    4.22
   5  -9   2    4.11    4.73
   5   1   8    8.41    9.12
   5   1   8   14.86    3.55
  -6   6   1    8.20    4.37
   3   5  10  132.87   51.26
  -6   1   5    7.98    3.42
  -6   1   5    0.91    2.96
   2 -10   8    0.72    3.46
  -2  10  -8    3.68    2.26
   4   7   6   21.87   18.00
  -1  11  -7    0.25    2.26
   1 -11   7    3.09    2.95
  -4   6   9   -0.46    2.53
  -4   4  10   -0.35    2.27
  -6   2   5   -0.57    2.24
  -6   2   5    1.29    1.87
   1  12  -3    8.70    2.99
  -1  -7  11    0.20    1.59
  -1  -7  11    0.48    3.98
   0   7  11   10.90    8.68
  -3  11  -5    2.44    2.75
   3 -11   5    0.15    3.11
  -2  12  -4    4.18    3.84
   2 -12   4    5.14    3.87
  -5   7  -6    6.26    3.27
  -5   9   2    3.27    2.61
   5  -9  -2    0.93    3.07
   5  -4   8    0.18    1.23
   5   6  -4   29.78    6.77
  -5  -6   4   22.02    8.58
   0  12   4   -0.25    2.23
   0  12   4    1.96    4.66
  -2  11   6    1.73    2.81
  -2  11   6    1.88    4.74
   2 -11  -6    1.86    2.67
   2  10   6    0.87    2.24
   2  10   6    5.54    6.78
   3  -7  10    0.39    1.27
  -5   4   8    5.55    6.65
  -5   4   8    3.01    4.28
  -2  -4  12   12.57    8.56
   0  10   8   11.01    9.54
   0  10   8    5.29    4.42
   6   3  -2   12.23    3.60
  -6  -3   2    7.39    6.92
   0  -6  12    5.60    2.85
   0  -6  12    1.95    4.55
  -4  -9   0   18.19    8.27
   5   2  -8    5.26    2.35
  -5  -2   8    2.28    6.86
   4   4   9   44.35   31.02
   4   4   9   49.47    5.90
  -6   2  -5    2.92    2.98
   6  -2   5    4.89    2.63
   0 -11   7    2.42    2.77
   0  11  -7    0.07    2.09
   4   9  -1    0.38    1.00
  -4  -9   1   -0.25    2.23
  -6   1  -5    2.18    2.89
   6  -1   5    5.42    2.70
  -2  -6  11    3.73    4.24
  -2  -6  11    4.56    5.96
   6   0  -5    1.86    1.58
  -6   0   5    4.76    2.93
  -3  -4  11    8.23    7.51
   4   2  10    7.45    2.37
   4   2  10    5.25   13.10
   3 -12   0    7.81    3.93
  -3  12   0    4.34    3.84
  -3  10  -7    1.85    2.08
   3 -10   7   -0.02    2.57
   5  -6   7    5.27    2.57
  -5   6  -7    3.64    2.44
   4   8  -5    1.98    2.10
  -4  -8   5    2.17    3.00
  -3 -10   4   13.02    4.62
   3  10  -4   14.39    2.81
  -1  12  -5    0.74    2.98
   1 -12   5    4.14    3.15
  -3   8   9    2.37    3.38
  -3   5  11    5.67    3.53
  -1 -10   8    6.49    2.31
  -1 -10   8    6.65    4.80
  -4  11   0   -0.26    2.02
   4 -11   0   -0.19    2.10
   1  10  -8    5.14    2.78
   2  -5  12   19.54    4.04
   3 -12   1    2.74    3.24
  -6   6  -2    1.83    2.87
   5  -7  -6    0.55    2.97
  -5   7   6    5.63    5.99
   6   3   2    6.60    3.40
  -6  -3  -2    3.89    5.12
   1  -6  12    0.97    1.45
   1  -6  12   -1.10    2.10
  -6   3   5   -0.04    1.92
  -6   3   5    1.31    2.41
  -6   3   5    3.44    3.34
  -6   6   2    2.04    1.91
  -6   6   2    0.96    2.62
  -3   9   8    1.35    2.88
  -4  -9  -1   48.91    9.02
  -4  11  -1    1.71    2.93
   4 -11   1    1.16    2.81
  -1  -3  13    2.36    4.36
  -3  -7   9    2.68    4.63
   3   7  -9    3.53    2.89
   1   5  12   14.41   13.31
   2  -7  11    0.15    1.21
   2  -7  11   -0.51    1.41
   3 -12  -1    4.52    3.84
  -3  12   1    6.30    3.30
   6  -3   5   14.73    3.54
  -6   3  -5    9.60    4.49
  -2   9   9    7.19    4.72
  -5   6   7    6.75    3.98
  -5   6   7   -6.14    7.61
  -6  -2   4    1.26    3.51
   6   2  -4    2.01    1.81
   4 -11  -1   -1.78    2.29
  -5   8  -5    4.15    3.23
  -4  11   1    2.40    2.06
   4   9  -2    1.69    1.49
  -4  -9   2    2.57    3.21
  -4  -3  10    0.43    4.01
   2   8   9    9.51   14.53
   4   3 -10    0.99    1.85
   3  -1  12    4.16    2.11
   5   7   0   39.25    6.66
  -5  -7   0   44.24   10.55
   6   0   5   31.24    5.34
  -4  10  -5    0.90    3.86
  -6   0  -5   15.97    5.59
   4 -10   5    2.62    2.80
   0 -12   5    0.15    3.24
   0  12  -5    1.72    2.52
   1  12   3    4.52    3.44
   1  12   3    2.58    7.52
   5  -9   3    3.20    3.18
  -5   9  -3    7.95    4.02
   4   6  -8    0.60    1.98
  -4  -6   8    0.97    2.62
  -2   8  10    3.61    3.36
  -5  -7   1   21.45    8.43
   5   7  -1   23.68    4.19
  -3  -1  12    7.94    7.07
   2  11   4   -1.58    1.69
   2  11   4   13.58    6.50
  -3  -8   8    3.00    3.94
   3   8  -8    6.03    2.90
  -5  -6  -4   41.32   10.54
   0  -4  13    8.91    5.04
   5   6   4   48.91    5.62
  -2  12   4    0.62    1.80
   2 -12  -4    2.24    1.93
  -3  12  -2   -0.36    2.56
  -5  -5   6    9.48    4.82
   5   5  -6   11.85    3.54
   3 -12   2   -1.54    2.57
  -3  11   5    3.68    2.51
   3 -11  -5    1.03    2.59
   5   4  -7    8.26    3.24
   2   7  10    4.01   11.71
   3   9   6   48.61   27.49
   3  -2  12    2.96    2.00
   3   0  12   -0.14    8.84
   3   0  12   19.26    3.22
  -6   5  -4   -0.41    1.96
   4 -11   2    2.89    3.02
  -4  11  -2    1.32    3.24
   1   8  10   -0.39    5.37
   5   7   1   21.85    3.71
  -5  -7  -1   21.76    7.60
  -6   5   4    2.54    2.69
  -6   5   4    1.62    2.34
  -6   5   4    0.61    2.07
   6   3  -3   27.28    4.68
  -6  -3   3   15.96    9.10
  -3   7  10    3.95    3.62
  -5   8   5    2.19    8.48
   5  -8  -5    4.46    3.81
  -3  -6  10    9.96    6.56
   3   6 -10    6.86    3.65
  -2   0  13    4.22    5.16
   6   1  -5    4.02    2.11
  -6  -1   5    6.73    3.93
  -5   9   3    2.11    2.19
   5  -9  -3    4.74    3.27
   5   2   8   32.96   29.31
   5   2   8   62.73    6.49
  -2 -10   7   10.53    3.92
   2  10  -7    2.12    1.99
  -2 -10   7    8.75    2.11
   4   7  -7    0.93    1.52
  -4  -7   7   -0.26    1.27
   1   9   9   39.32   20.72
   6   2   4   44.76    7.03
  -4  -9  -2   49.70    7.13
   1  11   6    7.63    4.72
   1  11   6    0.02    9.79
   4  -5  10    4.37    2.26
  -2   1  13   -0.09    2.36
   1  12  -4    6.11    3.70
  -1 -12   4    3.62    3.39
   1  -9  10    0.57    3.33
   1  -9  10    2.37    1.60
  -2   5  12    0.42    1.61
  -4  -5   9   24.45    9.80
   4   5  -9   30.25    5.64
   0  -9  10    4.12    5.20
  -2  10   8    5.90    5.56
   0  -9  10    7.44    2.54
  -3  12   2    4.10    2.29
   3 -12  -2    1.10    3.02
   5   7  -2    6.24    2.63
  -5  -7   2    7.65    6.90
  -4  11   2    2.35    3.38
   4 -11  -2    4.90    3.30
   2   9   8   -6.09   10.80
   3  10   4    8.88    8.57
   2  -1  13    4.67    1.86
   2  -1  13   -2.60    7.44
  -6   6  -3    3.41    3.21
  -2  11  -7   11.70    4.72
  -1  11   7    2.40    2.84
   2 -11   7    6.23    4.77
  -1  11   7    0.13    5.86
  -2  -1  13   10.47    7.11
   3 -10  -7   -0.77    2.63
  -3  10   7   -0.41    2.92
  -6   4   5    0.71    2.99
  -6   4   5   -1.45    2.20
   1 -13   0    0.23    1.40
  -4  10   5    1.37    1.99
   5  -5   8    7.28    2.52
   4 -10  -5   -0.73    1.90
   2   4  12   18.67   17.64
   4   8   5   31.15   18.27
  -2 -11   5    4.42    3.05
   6  -4   5    2.93    1.78
  -6   4  -5    0.90    2.61
  -6   6   3   -0.23    1.39
  -6   6   3    1.47    1.74
  -6   6   3    1.76    1.95
  -5   1   9    0.82    2.06
  -5   1   9    1.72    3.48
   2   0  13   -2.64    6.75
   2   0  13   -0.13    0.93
  -1  12   5   -2.48    4.22
  -1  12   5   -0.01    1.84
   1 -13   1    0.60    1.83
  -6  -3  -3    9.18    6.07
   6   3   3   15.02    4.30
  -1  -6  12    4.17    3.02
  -4  -9   3    5.17    3.52
   4   9  -3    6.37    2.30
  -1  -6  12    8.86    5.23
   1 -10   9   -0.06    2.54
   3  -3  12    5.53    2.37
   3   1  12    3.24    1.57
  -4   9  -7    4.81    2.36
   3   1  12   -1.09    8.20
  -4   5  10    6.70    3.99
   4  -9   7    1.49    2.24
  -5   5   8    8.94    7.31
  -5   5   8    2.14    4.10
   6   1   5    3.40    2.50
  -6  -1  -5    2.55    2.76
   0  -8  11    1.79    1.95
   0  -8  11    2.37    3.55
   2  -2  13   -2.07    4.00
   2  -2  13    4.32    1.85
   3   4  11    8.65   16.00
   2 -12   5   -0.65    2.33
  -2  12  -5    1.54    2.12
  -3  -2  12    1.50    4.50
  -5   2   9    5.08    4.41
  -5   2   9    1.98    3.18
  -5   0   9   -1.12    1.41
  -5   0   9    3.01    2.51
   6   4   0   37.96    5.80
   1   7  11   36.85   26.02
  -6  -4   0   27.50   10.66
  -5  -7  -2    0.87    2.78
   5   7   2    1.19    1.36
   0 -10   9    1.72    1.45
  -4   1  11    4.14    4.15
   0 -10   9    4.03    3.39
  -4   1  11    1.13    1.65
  -1   6  12   -0.32    1.42
   5   6  -5    5.15    2.69
  -5  -6   5    4.77    3.90
   1  -8  11    8.49    4.81
   1  -8  11    8.99    2.69
   1 -13  -1    3.35    2.82
   3  -6  11    0.39    1.28
   4  -7   9    4.30    1.84
   5   3  -8    4.05    2.30
  -5  -3   8    5.96    4.39
   0  11   7   -1.26    8.10
   0  11   7    4.47    3.48
  -3  12  -3    1.78    3.17
   3 -12   3    3.64    3.07
  -2   7  11    4.41    3.31
  -3   3  12    1.65    1.73
  -2   2  13    0.53    2.81
   6   4  -1   21.42    4.27
  -6  -4   1   14.62    8.48
  -4   0  11    4.30    5.54
  -6   7   0    1.54    2.81
   4 -11   3    5.51    2.96
  -4  11  -3   -1.44    3.27
   4   3  10   18.67    3.76
   4   3  10   16.02   20.26
   2   6  11   26.58   21.64
   5   5   6   17.34   15.29
   5   5   6   10.87    3.03
   1 -13   2    1.01    2.06
   0  12   5    2.85    2.68
   0  12   5   -1.94    6.91
   5  -1   9   24.50    4.43
  -6  -4  -1   29.41   10.22
   6   4   1   37.87    5.84
   5   4   7   49.23   24.02
  -3 -10   5    3.40    3.38
   5   4   7   48.11    5.63
   3  10  -5    4.43    1.94
  -3  -9   7    1.40    1.38
   5  -2   9    1.54    1.80
   3   9  -7    0.54    1.87
  -6   1   6    2.40    2.91
  -1  -4  13    0.19    2.53
   2   1  13   -2.13   17.41
   2   1  13   27.74    2.82
  -6   7  -1    1.10    3.43
  -4   8   8   -0.06    2.00
  -4   2  11    6.96    4.37
  -4   2  11    0.91    2.13
  -3  11  -6    1.72    2.04
   3 -11   6   -0.65    2.53
  -5   9  -4    2.17    2.54
  -6   2   6    4.19    3.42
  -6   2   6    3.85    3.65
   5  -9   4    0.47    2.38
   6  -7  -1    1.44    2.17
  -6   7   1    3.17    2.77
   1  10   8    5.59    7.70
   1  10   8    1.18    4.66
  -2  -2  13   -0.55    3.45
  -5  -7   3    4.70    4.52
   5   7  -3    4.33    2.37
   4  -1  11   24.34    3.96
  -2  -5  12    2.63    4.88
  -1 -11   7    1.12    2.38
   1  11  -7    1.04    1.95
   3   7   9   14.60   18.53
   4   6   8   54.47   27.27
   1  12   4    7.82    4.11
   1  12   4    8.30    9.74
  -4  -9  -3    0.54    1.51
   4  -2  11   15.08    3.36
   6   4  -2    1.71    2.61
  -6  -4   2    2.17    3.96
  -5   3   9    1.56    3.48
  -6  -2   5    3.46    3.29
   6   2  -5    1.90    1.79
  -5   3   9    0.98    3.57
  -6  -3   4   29.13    8.80
   6   3  -4   32.79    4.88
   3 -12  -3    1.14    2.11
  -4  -1  11    9.10    7.13
  -5  -1   9    2.56    4.19
   4 -11  -3    0.38    1.98
   5   0   9   36.03    4.67
   5   0   9   -0.61   11.91
  -4  11   3    0.35    1.23
   4   8  -6    2.84    2.24
  -4  -8   6    3.11    2.28
   6  -2   6    4.77    2.41
  -6   2  -6    2.53    2.48
  -1  12  -6    2.49    2.60
   1 -12   6    2.61    3.08
   2  -3  13    5.52    2.23
   6  -1   6    4.04    4.30
   6  -1   6    3.84    2.55
   4  -9  -7    3.59    2.64
  -4   9   7   -1.19    3.09
  -2 -12   0    0.04    1.35
  -4   7   9    3.34    3.63
   2  -6  12   -0.36    1.28
  -3  -5  11    7.45    6.63
   5  -3   9    8.50    2.85
   0 -13   2   -0.11    1.48
   4   0  11    1.05    1.43
   3   8   8    2.78    9.14
   4   0  11    0.18    4.59
  -5   9   4    1.81    3.61
   5  -9  -4    1.55    2.81
  -2 -12   1    0.20    1.61
   4   7   7    4.56   10.40
  -5   7  -7   -0.24    1.25
  -3   6  11   -1.40    3.19
  -4  -4  10    4.13    4.03
   4   4 -10    0.91    2.06
   2 -13   0    1.79    2.31
  -6   3   6    4.56    3.45
  -6   3   6    1.56    3.02
  -6   7  -2    5.54    4.81
  -2  -8  10    4.21    4.09
  -2  -8  10    3.38    3.51
   3  -9   9    4.39    2.63
  -3 -11   0   -0.20    1.39
   6   4   2   34.54    5.35
  -6  -4  -2   16.93    8.43
   2 -13   1    2.13    2.52
   3  -4  12    3.48    2.01
   0  -5  13    4.47    3.70
  -6   7   2    1.45    2.26
   6  -7  -2    1.39    1.99
   3   2  12    7.20   10.39
   3   2  12    3.72    1.39
   4   5   9   19.35   18.94
   2  11   5    0.03    1.54
   2  11   5   -3.81    4.42
   5   6   5   31.95    4.11
  -3 -11   1   13.12    3.85
  -2  11   7   -0.03    1.57
  -6   6  -4    5.38    3.32
  -2  12   5    0.46    1.70
   2 -12  -5    1.26    1.47
   3   6  10    3.93   11.89
  -6   5  -5    2.60    2.52
   2  10   7   13.50    6.39
   2  10   7   14.55   12.52
  -5   8  -6    1.45    1.99
  -1  11  -8   -0.09    1.23
   1 -11   8    0.97    1.95
   0 -12   6    3.08    3.22
   0  12  -6    6.80    3.93
  -6   3  -6   13.93    4.17
   6  -3   6   23.00    3.87
  -6   5   5   -0.12    2.26
  -6   5   5    3.25    2.61
   2  12   1   -0.01    1.19
  -2   3  13   -1.99    3.43
  -4  10  -6    4.26    2.65
   4 -10   6    1.78    2.60
   5   7   3    4.51    1.67
   1 -13   3    0.29    2.29
  -5  -7  -3    1.63    3.04
  -1  13  -3    2.31    2.41
   4   9  -4    8.71    3.67
  -4  -9   4   11.94    3.96
   5 -10   0    0.29    2.13
  -5  10   0    1.10    2.24
  -6   6   4    2.25    2.01
   5   3   8    5.40    2.35
  -6   6   4    0.92    2.26
  -6   6   4    3.72    2.77
   5   3   8   13.51   11.86
   4  -3  11   -0.30    1.29
  -4   3  11    2.82    2.54
  -1 -12   5    2.15    2.01
   1  12  -5    0.99    2.48
  -2  -9   9   14.73    5.85
  -2  -9   9   18.96    5.29
   0  -7  12    2.09    2.26
   0  -7  12    6.41    3.67
   2 -13  -1    0.87    1.94
   2  -9  10    0.72    1.10
   2  -9  10    1.87    2.13
   6   0   6   14.31    3.83
   5 -10   1    2.99    2.65
  -5  10  -1    1.28    2.97
   6   3   4   27.50    4.88
  -6  -3  -4    4.00    8.50
  -2 -12   2    0.44    1.83
  -3  -3  12    5.17    7.96
  -3 -11  -1   -0.32    1.34
   3  -8  10    0.10    0.84
  -6  -2  -5    1.87    4.20
   6   2   5   14.38    3.51
  -1  -9  10    2.97    1.98
  -1  -9  10    2.56    3.67
  -5   7   7    1.21    1.82
  -5   7   7    4.75    5.64
  -3  12  -4   -2.06    2.78
   3 -12   4   -1.98    2.72
   0  11  -8    6.67    2.54
   0 -11   8    6.81    4.10
   2   2  13    2.36    8.25
  -5  10   1   -1.15    1.87
   0   9  10    6.43    7.47
   5 -10  -1    2.53    2.06
   1  -7  12    6.28    3.80
   1  -7  12    7.78    2.59
   4  -6  10    0.84    1.30
  -3   4  12    3.08    2.16
   1  -5  13    1.11    1.61
  -3  11   6    1.57    2.22
   3 -11  -6    2.03    2.28
   2 -10   9    1.56    2.56
   2 -13   2   -0.54    1.90
   3 -10   8    2.85    2.24
  -3  10  -8    0.66    1.51
  -3 -11   2   11.21    3.60
  -6  -1   6    1.84    2.49
   6   1  -6    0.16    1.12
   4 -11   4   -0.93    1.41
  -4  11  -4    0.98    1.45
   1   6  12    4.85    7.82
  -6  -4   3    1.88    3.48
   6   4  -3    1.05    2.34
   0  -1  14    0.09    0.65
   3  10   5    4.53    9.30
   5   1   9   -2.67    7.99
   5  -6   8    3.32    1.62
   5   1   9    2.76    1.88
  -2  -7  11    4.48    3.92
  -2  -7  11    1.49    2.35
  -1  10   9   -0.17    1.94
  -1  10   9    1.72    3.13
   4   1  11   18.22    3.02
   4   1  11   14.02   15.93
  -5   8   6    9.90    4.08
   5  -8  -6   -1.71    1.67
   1   4  13   -2.57    5.82
  -1  -8  11    1.90    1.98
  -1  -8  11    3.05    3.69
  -2  -3  13   -1.14    3.79
   0 -13   3   -0.20    1.53
   0  13  -3    1.52    1.99
   5   5  -7    1.14    1.81
  -4  -2  11   -1.20    3.91
   5  -4   9    0.87    1.44
   0   8  11    6.07    7.97
  -5  -7   4    1.60    2.34
   5   7  -4    0.03    1.44
  -5   4   9    2.09    3.38
  -5   4   9    1.59    4.13
  -5  -2   9    0.53    3.25
   5 -10   2    1.96    2.43
  -5  10  -2    2.14    3.96
   5   2  -9    1.12    1.36
  -2 -11   6    1.43    1.61
   2  11  -6   -0.90    1.01
   2  12   2    7.44    7.25
   2  12   2    6.01    3.47
   2  -8  11    2.98    1.93
   2  -8  11    0.71    1.41
   0  10   9   -1.85    2.86
   0  10   9   -2.15    5.54
  -2   6  12   -0.66    1.63
  -6   7  -3    3.89    3.10
  -6   4   6    2.09    3.13
  -6   4   6    2.85    2.80
  -5   6   8    5.13    6.45
  -5   6   8    1.61    3.26
   3   9   7   56.18   21.11
  -1 -10   9    0.65    1.12
  -1 -10   9   -0.55    2.31
   2 -13  -2    2.05    1.78
  -2  13   2    0.47    1.46
   2  -4  13    4.56    2.09
  -6   4  -6    3.37    2.60
   6  -4   6    6.34    2.20
  -4  10   6   -0.29    2.10
   4 -10  -6    0.98    1.91
  -4   6  10    3.17    3.44
  -3 -11  -2    0.96    1.84
   4   8   6   42.56   15.50
  -6   7   3    1.90    1.29
  -6   7   3    0.12    1.63
  -6   7   3   -0.35    1.30
   2 -12   6   -0.56    1.59
  -6  -4  -3    0.63    3.79
  -2  12  -6    0.43    1.29
   6   4   3    4.55    2.38
   5 -10  -2    2.35    2.63
  -5  10   2    1.65    1.96
   2   5  12    1.66   10.40
  -1  12   6    3.62    2.73
  -1  12   6    6.41    8.04
   5   4  -8    1.86    1.97
   5   6  -6    6.43    2.91
  -5  -6   6    7.23    3.13
  -5   9  -5    1.77    2.25
   2  12  -3   -1.39    1.52
   3 -12  -4    0.55    1.68
   4 -11  -4    0.79    2.01
   6   1   6   30.13    4.99
   4  -4  11    1.29    1.54
   1  11   7    0.14    2.43
   1  11   7    3.11    5.26
  -3   9   9    3.33    2.96
  -2 -10   8   12.87    4.68
  -2 -10   8   13.08    3.09
   2  10  -8   12.93    2.82
   4   7  -8   -0.21    1.44
   4   4  10   46.33   26.25
  -1  -5  13    1.12    3.08
   4   4  10   42.60    4.35
  -2  13  -3    1.57    2.86
   2 -13   3    3.88    2.67
  -3 -11   3   10.49    3.37
  -4  -6   9    1.96    2.64
   4   6  -9    0.57    1.84
  -3 -10   6    4.43    2.96
   3  10  -6    5.77    2.12
   6   3  -5    0.13    1.02
  -6  -3   5   -0.18    1.79
  -1  13  -4    0.62    2.55
   1 -13   4    3.68    2.56
  -4   4  11    1.62    2.60
   3   8  -9   19.85    4.42
  -3  -8   9   18.13    5.93
   1  -1  14    0.00    0.55
  -1  -1  14   -0.74    2.28
   3   5  11   22.26   19.94
   1   0  14    0.07    0.55
   0  13   3    0.20    3.31
  -3   8  10    4.57    3.34
   1  12   5    1.93    3.65
   1  12   5   -0.33    1.47
  -3  -7  10   11.72    4.11
  -3  -7  10    2.27    2.21
   3  -7  11   13.81    2.61
   2 -11   8    2.54    3.29
  -2  11  -8    5.03    1.99
   3  -5  12    0.56    1.24
   0  12   6    2.45    4.71
   0  12   6   -0.09    2.46
   3   3  12   39.53   23.37
   5   7   4   22.38    3.33
  -5  -7  -4   19.11    3.71
   5  -9  -5    3.14    2.85
  -5   9   5    0.51    3.75
  -6  -5   0    3.55    4.23
   6   5   0    3.20    2.09
  -5  10  -3    3.42    2.46
   5 -10   3    0.20    2.04
  -3  10   8    2.07    2.46
  -2   9  10    0.12    1.63
  -1  -7  12    0.01    3.22
  -1  -7  12   -2.04    1.88
  -1  11   8    0.03    1.25
  -1  11   8   -0.09    2.41
   6   2  -6    1.08    1.77
  -6  -2   6   -0.01    2.55
   6   5  -1    1.36    1.58
  -6  -5   1   -0.09    3.33
   4   2  11   10.54   13.38
   4   2  11    7.43    1.81
   4   9  -5    6.21    3.42
  -4  -9   5    7.82    2.96
  -6   6  -5    4.69    2.77
   1  -2  14    0.19    0.80
  -6  -4   4   12.77    5.07
   2   3  13   -2.24    9.53
   6   4  -4    7.07    2.76
   5   2   9   44.31   20.02
   5   2   9   33.69    4.27
  -6   1   7    1.20    2.43
   4  -8   9    6.80    1.37
  -6   8   0    2.49    2.68
   6  -8   0    2.05    2.42
   2   8  10   12.11   13.32
  -3  11  -7    0.60    1.23
   3 -11   7   -1.42    1.67
   5   8   0   40.78    4.22
  -5  -8   0   51.46    8.73
   0 -13   4    3.37    2.30
   0  13  -4    3.96    2.85
   5   5   7   44.82    4.52
   5   5   7   42.91   18.50
  -1   7  12    0.49    1.35
  -6   2   7    2.62    2.93
  -6   2   7    4.48    3.31
  -6  -5  -1    3.99    4.82
   6   5   1    7.11    2.49
  -6   6   5   -1.30    2.99
  -6   6   5    1.38    1.74
   2  12   3    4.39    3.15
   2  12   3    2.57    5.65
  -5  -8   1    2.90    3.19
   5   8  -1    2.30    1.54
  -2  10   9   -0.04    1.41
  -2  -6  12    1.77    1.91
  -2  -6  12    1.73    3.84
  -6   8  -1   -0.54    2.79
   2 -13  -3   -0.85    1.36
   3 -12   5    1.94    2.86
  -1  -2  14    1.87    2.68
  -3  12  -5    4.39    2.74
  -3  -4  12    9.88    6.75
   5  -5   9    0.33    1.05
   6  -8  -1    0.55    1.85
   2   9   9   12.87   12.36
  -6   8   1    2.45    2.21
   5 -10  -3    1.19    2.27
  -5  10   3    1.07    1.30
  -4  -3  11    0.43    3.03
  -4 -10   0    0.04    1.19
  -6  -3  -5    2.26    4.22
   6   3   5   30.85    4.04
   0  11   8   -2.71    4.77
   0  11   8   -0.26    2.16
  -4  -8   7    6.06    2.27
   4   8  -7    3.40    2.55
   3  11   3   13.76    5.96
  -1  12  -7    1.23    1.75
   1 -12   7    1.29    2.32
   3   9  -8    0.81    1.71
  -3  -9   8    1.87    2.55
  -4 -10   1    3.63    2.53
  -4  11  -5    3.20    2.59
   4 -11   5    2.11    2.52
   5   8   1   37.91    3.73
  -5  -8  -1   47.33    7.07
  -1 -12   6    2.83    2.25
   1  12  -6    3.40    2.44
  -3   5  12    1.54    1.81
  -4  -5  10    2.05    4.09
   4   5 -10    0.81    1.77
  -6   5  -6    1.87    2.11
   6  -5   6    3.67    1.45
  -6   7  -4    0.95    1.98
  -6  -5   2    6.49    4.15
   6   5  -2    2.44    2.09
  -2  -4  13    5.52    5.19
  -6   5   6    2.53    2.50
  -6   5   6    0.32    2.25
   6  -2   7   27.68    4.34
  -2   8  11    3.84    3.77
  -5   5   9    0.88    2.96
   5   6   6    2.59    1.47
  -5   5   9    2.65    5.70
   5   6   6   13.78    4.86
   1   9  10    6.96    8.53
  -2  12   6    0.35    1.41
   2  11   6   -0.01    2.63
   2  11   6    5.48    5.15
   0  -6  13    5.14    2.42
   0  -6  13    5.06    3.43
   2  -7  12   -0.37    1.10
  -4  12   0    2.04    2.38
   5   4   8   14.97    9.01
   4 -12   0    3.65    3.56
   5   4   8    3.29    1.74
   6  -1   7    2.47    3.52
  -5  -3   9   11.86    5.91
   6  -1   7    2.10    1.89
   5   3  -9   15.98    3.14
  -1 -11   8    2.28    2.24
   1  11  -8    1.02    1.37
   2  12  -4    9.10    2.44
  -5  -7   5    1.89    2.60
   5   7  -5    0.29    1.55
  -6   7   4    2.78    1.60
  -4 -10  -1    3.56    2.24
  -6   7   4    2.60    2.76
  -6   7   4    2.85    1.95
  -3  -6  11    0.35    3.24
   2   7  11    5.05    9.26
   4 -12   1    2.62    2.39
  -4  12  -1    0.35    2.34
  -3  -6  11   -2.45    2.57
  -5  -8   2    4.07    2.78
   5   8  -2    0.86    2.04
  -6   3   7    1.47    2.62
  -6   3   7    3.23    3.05
  -5   1  10    6.38    3.62
  -5   1  10    0.68    1.84
  -6  -4  -4   -0.13    1.54
   6   4   4   -0.06    1.13
   0 -12   7    5.76    3.31
   1 -10  10    1.79    2.46
   0  12  -7    7.26    2.76
   6   2   6   -0.30    1.38
  -3   7  11   -4.40    2.95
   1   8  11   -3.50    6.14
  -6   8  -2    0.31    2.38
   2  -5  13    2.27    1.61
  -3 -11   4    1.47    1.72
   1  -9  11    1.52    2.09
   1  -9  11    0.48    1.05
  -5   8  -7    0.71    1.23
   2 -13   4   -0.52    1.98
  -2  13  -4   -1.19    1.96
  -3   0  13    3.32    4.43
  -4  10  -7    0.75    1.44
   4 -10   7    0.86    1.44
   0  -9  11    1.72    1.34
   0  -9  11   -0.53    2.70
   4 -12  -1    2.02    2.21
   4  -5  11    0.57    1.19
  -4  12   1    1.18    1.80
  -3   1  13    4.01    4.51
  -4 -10   2    1.09    1.88
   1  -6  13    0.66    1.41
   1  -6  13    2.05    1.93
   6   5   2   27.18    3.90
  -6  -5  -2   13.40    6.72
   1  -3  14   -0.06    0.82
   0 -10  10    4.88    2.83
   0 -10  10    1.20    1.19
   6  -3   7    0.61    1.29
  -5   0  10    5.54    4.74
  -6   8   2    0.92    1.47
   6  -8  -2   -1.50    1.44
  -5   2  10    0.05    3.87
  -5   2  10   -2.98    2.06
   4  -7  10    0.79    1.01
  -4   8   9    1.05    3.46
  -4   9   8   -3.07    3.31
  -3  13   0    0.65    1.69
   3 -13   0    0.78    1.90
   3  10   6    4.10    4.00
   3  10   6    0.06    1.52
   1   5  13    1.12    3.07
   6   0   7   14.89   13.24
   6   0   7   28.37    4.53
   1  10   9    6.51    7.52
   1  10   9   -2.17    2.29
   1  13  -3    0.44    1.78
   3 -13   1    2.87    2.38
  -3  13  -1    1.05    2.29
   5   8   2   31.03    2.85
  -5  -8  -2   38.52    5.80
   4   7   8   15.60   13.56
   4 -12   2    0.35    2.10
  -4  12  -2    1.54    2.20
   0  13   4    2.61    3.65
   0  13   4    0.18    1.19
   3  -1  13   -2.43    5.92
   3  -1  13    2.58    1.38
   4   6   9   54.60   24.20
   4   9   5    3.40    3.77
  -4  11   5    3.97    2.15
   4 -11  -5    1.14    2.50
  -3  -1  13    5.32    5.15
   3 -12  -5    2.96    2.19
  -1  13  -5   10.71    3.17
  -5  10  -4    1.24    2.10
   1 -13   5    3.79    3.26
   5 -10   4    1.25    1.47
   5  -1  10    4.40    1.95
   5  -1  10   -1.30    5.28
  -4   5  11   -0.18    1.74
   5  -2  10    4.18    2.04
  -2  11   8    1.35    2.70
  -3   2  13   -0.68    2.62
  -1  -3  14    3.42    3.01
  -3  11   7    1.17    2.44
   3 -13  -1    1.47    2.03
  -3  13   1    1.59    1.66
   6   5  -3    6.74    2.52
   2  10   8   12.45    5.03
   2  10   8   11.78   10.82
  -6  -5   3    9.47    4.93
  -4 -10  -2   14.83    2.82
   3  -2  13   -1.15    6.65
   3  -2  13   23.34    3.80
   3   0  13   26.89    2.84
   3   0  13   -0.99   14.65
  -5   8   7   -4.96    2.64
  -5   8   7    1.35    1.38
  -2 -11   7    1.40    2.22
  -5   9  -6    1.49    1.72
   2  11  -7    2.83    1.86
   3   8   9   11.73   12.17
  -4  12   2    0.69    1.27
   4 -12  -2    1.47    1.88
   5   8  -3   -0.14    0.94
  -5  -8   3    0.25    1.48
  -5   7   8    5.99    4.57
  -5   7   8   -0.59    2.29
   1 -11   9    0.01    1.33
   3   7  10    9.26   12.39
  -5  -1  10    0.52    2.65
  -3  13  -2    2.26    2.51
   3 -13   2    2.72    3.31
  -5   3  10   -0.02    2.97
  -5   3  10    1.30    1.87
   0  -8  12    3.78    3.56
   0  -8  12    4.74    1.97
   4   3  11    9.31    5.02
   4   3  11   -0.07    0.53
  -6   4   7    4.62    3.05
  -6   4   7    0.59    2.49
  -7   2   0    0.99    2.38
   6   3  -6    0.53    1.20
   5   0  10    2.12    1.79
   5   0  10   13.04    7.39
   2  12   4   -0.10    1.60
   2  12   4   -0.44    4.01
  -4 -10   3    4.04    2.54
   2 -12   7    3.78    2.72
  -2  12  -7    2.54    2.69
   1  -8  12    2.58    2.18
   1  -8  12   -0.46    1.37
  -6  -4   5    1.79    2.51
   6   4  -5    2.43    1.71
   6  -4   7    1.91    1.44
  -6   8  -3    1.23    2.07
   5   5  -8    0.45    1.39
   5 -10  -4    1.96    2.45
   5  -3  10   15.06    2.96
   0 -13   5    2.36    2.22
   0  13  -5    4.99    2.49
   7  -1   0    0.30    0.84
   3  -6  12    3.49    1.66
  -7   1   0    0.07    1.86
  -4   1  12    3.94    4.45
  -4   7  10    1.47    3.01
   5   6  -7    1.23    1.76
   3   4  12   -1.34    7.34
   5   3   9   34.83   21.31
   5   3   9   43.83    4.24
   0 -11   9    4.01    3.05
  -4  10   7    4.16    4.28
  -7   2   1    1.70    2.55
   1   7  12   -0.45    2.90
  -4   0  12    3.40    4.48
   3  11   4   18.81    7.07
  -2   7  12   -0.36    1.38
  -7   2  -1    4.41    3.17
  -2   0  14   -0.37    2.02
  -7   1   1    0.76    2.14
   4   8   7   39.42   13.99
  -6  -5  -3   29.54    6.18
   6   5   3   36.95    4.31
   2   4  13    1.31    5.32
   1  13   3    1.68    3.87
  -1  -6  13    3.95    3.09
  -6   8   3   -1.56    1.26
  -6   8   3   -0.19    1.40
  -1  -6  13    1.74    1.80
  -1  12   7    1.88    3.02
  -1  12   7    0.01    1.50
   3 -10   9    1.56    1.78
   1  12   6   -0.11    1.44
   1  12   6    1.75    3.78
   3  10  -7    2.52    1.10
  -3 -10   7    1.60    1.26
  -7   1  -1    3.13    2.07
   7  -1   1   -0.02    1.13
   6   1   7   33.59    4.74
  -7   3   0    5.05    3.20
  -2  -9  10    0.73    1.35
   3 -13  -2   -0.39    1.45
   3  -3  13   -1.02    2.75
   3  -3  13    1.13    1.18
  -2  -9  10    2.29    2.36
   4   9  -6    2.15    2.73
  -4  -9   6    5.80    1.88
   4 -12   3    1.82    2.19
  -4  12  -3    1.15    2.25
  -2   1  14   -0.18    1.76
   2   6  12   14.43   12.08
   4   5  10   11.96   13.92
  -3  -2  13    3.09    4.34
   3   1  13    0.13    0.72
   3   1  13   -2.96    3.92
  -5   9   6   -0.78    1.43
  -5   9   6   -3.24    3.37
  -6   6  -6    0.48    1.28
  -4  -4  11    6.80    4.95
   1  -4  14    2.48    1.53
  -2  -8  11    5.91    2.13
  -7   3   1    2.65    2.79
  -2  -8  11    2.67    3.86
   3   9   8    5.88    8.14
   2  -1  14    0.02    0.54
  -6   7  -5    1.16    1.68
  -2  -1  14    8.11    4.55
  -7   3  -1    2.90    2.62
  -5  -8  -3    1.23    1.30
   2  12  -5    1.61    2.11
   4  -1  12    2.76    1.47
   4  -1  12   -0.31    3.98
   7   0   0    0.71    1.34
  -7   0   0    4.62    2.56
  -3  12  -6    2.44    1.79
   3 -12   6    0.48    2.13
   2 -10  10    1.73    1.98
   2   0  14    0.02    0.58
  -6   6   6    0.97    1.82
   1  13  -4    2.46    2.33
  -6   6   6    1.06    2.15
   4  -2  12    3.20    1.67
  -4  -1  12    4.58    4.68
  -7   2   2    1.01    2.14
  -7   0   1    2.15    3.59
  -3 -11   5    1.98    1.95
   7   0  -1    1.68    1.24
  -6   7   5    0.86    1.85
  -6   7   5    3.46    2.42
   0  12   7    4.21    4.27
   0  12   7    0.06    1.74
  -5  11   0   -1.09    2.68
   5 -11   0   -2.05    2.11
  -7   1   2    5.02    3.51
  -3  -5  12    2.46    3.48
   2 -13   5    1.08    2.33
   6   2  -7   -0.01    0.96
  -2  13  -5    2.13    1.97
   1  11   8    0.04    1.84
   1  11   8    3.18    4.42
  -3  13  -3   -1.05    1.39
   3 -13   3    0.90    1.40
   3   6  11   16.02   14.18
   4 -11   6    2.52    1.97
  -5   6   9    2.10    6.26
  -4  11  -6    2.39    1.92
  -5   6   9    5.41    3.66
   2  -9  11    1.55    0.87
   2  -9  11    0.44    1.54
   2  -2  14    1.59    1.51
  -7   2  -2    7.10    3.53
   7   0   1    3.54    1.76
  -7   0  -1    3.81    3.13
   5   1  10    7.21    2.10
   5   1  10   10.98   10.94
  -2  -5  13    1.47    3.20
   5   4  -9    1.56    1.49
   6   3   6    8.76    2.74
  -5  11  -1    0.51    2.13
   5 -11   1    2.34    1.95
   4   0  12   13.33    2.35
   6   4   5    2.73    1.86
   4   0  12   23.37   12.96
  -1  -9  11    1.08    4.95
  -1  -9  11    5.50    1.80
   3  -8  11    4.53    1.36
   4 -12  -3    1.11    1.84
  -1  10  10    0.95    2.06
   7  -1   2    0.78    1.36
  -7   1  -2    3.45    2.28
   6   5  -4    3.26    2.45
  -6  -5   4    2.48    2.98
  -1   9  11   -0.03    1.05
   5  -4  10   -0.05    0.85
  -3   6  12   -2.21    1.86
  -5  -7   6    2.32    1.42
   5   7  -6    0.48    1.65
  -5  -2  10    2.92    3.52
  -5   4  10   -3.90    2.49
  -5   4  10    0.24    3.37
  -2 -10   9    0.78    1.14
   5 -11  -1   -0.43    1.63
  -2 -10   9    2.70    2.58
  -5  11   1    0.89    1.27
   4  -6  11    2.30    1.31
  -7   3   2    4.55    2.94
  -1 -10  10    2.77    2.83
  -1 -10  10    2.85    1.28
   4   7  -9    0.57    1.51
  -5  -8   4    3.21    1.99
   5   8  -4    1.40    1.63
  -7   4   0    0.25    1.69
  -1  -4  14    0.94    2.23
  -7   3  -2   -0.87    1.91
  -1 -12   7    2.03    2.09
   1  12  -7    4.31    1.86
   2  -6  13    0.78    1.14
   4  -3  12    2.93    1.63
   0  10  10    4.60    6.93
  -2  -2  14    9.63    4.78
  -4 -10   4    1.99    1.71
   3 -11   8    2.84    2.24
  -6  -6   0   11.41    6.87
   6   6   0   16.12    2.87
  -5  10  -5   -0.92    1.62
  -7   0   2    4.36    3.19
  -7   4   1    2.64    2.51
  -7   4  -1    0.38    1.67
   2 -11   9    0.03    1.24
   6   6  -1   16.49    2.93
  -6  -6   1    9.40    5.23
  -6   5   7    1.46    2.26
   0  13   5    3.39    1.76
   0  13   5    1.79    5.15
  -6   5   7    2.89    2.61
  -6   8  -4    0.79    1.69
  -6   2   8    6.01    3.48
  -5  11  -2    3.13    2.37
   5 -11   2    1.50    1.95
   3 -13  -3   -0.06    1.04
   3  -4  13    0.14    0.89
   5   5   8   41.72   14.88
   7   0   2    2.98    1.76
  -7   0  -2    4.74    3.74
  -6   9   0   -0.99    1.85
  -2  12   7   -0.25    1.20
   3   2  13   -7.60    9.40
   4   8  -8    2.44    1.97
   4   6 -10   -0.03    1.44
  -4  -6  10    2.31    2.45
  -2  -7  12    7.48    4.27
  -2  -7  12    7.17    2.35
   1 -12   8    3.90    2.54
  -3   9  10   -1.12    1.92
   2  11   7   12.16    5.32
   2  11   7   -0.27    2.59
  -3  -8  10    0.74    2.04
  -3  -8  10    1.55    1.97
   2  -3  14    0.52    0.95
  -6  -6  -1    7.00    3.41
   6   6   1    4.88    1.86
  -1  -8  12    1.61    1.38
  -1  -8  12    0.74    2.55
   7   1   0    0.78    1.16
  -7  -1   0    0.37    2.40
   0  -7  13    1.64    1.44
   0  -7  13    2.96    2.35
  -1  13  -6    1.87    1.55
   1 -13   6    0.03    1.82
   4 -12   4    1.27    1.95
  -7   2   3    1.62    2.21
  -4  12  -4    1.56    1.95
  -6   9  -1    2.32    2.36
   4   1  12    3.28    1.22
   4   1  12   -2.06    9.03
  -4  -2  12    3.55    5.61
  -6   8   4    3.32    2.40
  -3  10   9    2.77    2.27
   6   2   7    8.22    2.55
  -3  -3  13    0.60    2.81
   5 -11  -2    0.63    1.69
  -4   6  11   -4.22    3.54
  -7   1   3    3.68    2.72
  -7  -1   1    1.51    2.15
   7   1  -1    0.12    0.94
   6   5   4   38.59    5.07
  -1  11   9   -0.05    1.32
  -6   9   1    1.30    2.28
   1  13   4    7.90    5.94
   4 -11  -6    0.84    1.60
  -1   8  12    0.39    1.12
   6  -2   8    4.51    3.88
   6  -2   8    3.85    1.89
  -7  -1  -1    5.54    4.95
   2  -8  12    0.10    0.69
   7   1   1   14.08    2.58
  -6  -6   2   13.33    5.35
   6   6  -2   16.39    2.92
  -7   2  -3    2.94    2.41
   6  -1   8    4.16    1.98
   0   8  12   -0.01    0.70
  -7   4   2    2.05    2.29
   5 -10  -5    1.16    2.04
   0 -12   8   -0.48    2.06
   2  12   5   -0.20    1.81
   2  12   5    4.75    3.69
  -3  -9   9   -0.57    1.65
  -6   3   8   -1.06    1.76
  -6   3   8    0.49    1.39
  -7   4  -2    2.46    2.35
  -3 -12   1    0.35    1.32
   7  -1   3    3.25    2.39
  -7   1  -3    4.58    2.52
  -7   3   3    0.59    1.59
   3  10   7   18.09   10.51
   3  10   7   26.76    6.05
   4   4  11   47.93   28.90
   3 -13   4   -0.58    1.79
  -3  13  -4   -1.10    1.66
  -3  -7  11    1.01    1.85
  -3  -7  11   -0.01    1.26
   3  11   5   -0.80    1.39
   0 -13   6    0.31    1.42
   0  13  -6   -0.02    1.06
  -1 -11   9    4.74    2.70
   6   4  -6    3.59    1.82
   0  11   9    4.18    3.66
   0  11   9   -0.05    1.91
  -7   3  -3    1.63    2.12
   5   2  10    5.86    1.84
   5   2  10   22.94    9.81
   6  -3   8    0.11    0.89
  -3   8  11    9.02    3.10
  -6   9  -2    0.66    1.68
  -2  14   0   -0.25    0.92
  -7   0   3    3.24    2.95
   4  -4  12   16.85    2.63
   1  -5  14    0.33    0.95
  -7  -1   2    1.36    2.70
   6   6   2    1.51    1.49
   2 -14   1    0.71    1.35
  -6  -6  -2    0.73    1.81
   5   4   9   11.10    9.98
   1  13  -5    1.99    1.85
  -5  11  -3    0.51    1.59
   5  -5  10    1.38    1.14
  -7   5   0    2.94    2.51
  -2  10  10    2.59    2.85
   6   0   8    0.77    1.35
   4 -12  -4    0.35    1.39
   3  12  -2    0.86    1.09
  -2  -3  14    3.37    3.06
   6   3  -7    0.47    0.97
   2   9  10   11.68    8.81
  -2   9  11    1.82    1.86
  -1  14  -3    0.16    1.24
  -7  -1  -2    4.87    4.54
   7   1   2   15.83    2.76
   3  -7  12    0.02    0.64
   3   5  12    8.93   10.59
   7   0   3    1.64    1.51
  -7   5   1   -0.81    1.80
  -7   5  -1    0.76    1.89
  -5   5  10    1.27    2.32
   2  12  -6    2.51    1.78
  -5   5  10   -0.14    2.48
   2   8  11    4.53    6.66
   6   5  -5    1.79    1.56
  -3  11   8    0.02    0.99
  -4   9   9   -1.74    3.21
  -5   8   8   -8.11    3.82
  -5   8   8    1.12    2.07
   6   6  -3   16.10    2.89
  -6  -6   3   14.77    4.48
  -5  -9   0    0.85    1.45
   2 -14   2    1.88    1.68
   5   8  -5    1.78    1.82
  -5  -8   5    5.17    1.76
   2  -4  14    0.71    0.98
   5 -11  -3    1.88    2.05
   3  11  -6    5.85    2.09
  -5  -9   1    4.56    2.31
   4   9  -7    0.72    1.24
  -4  -5  11    4.30    3.14
   2 -13   6    4.33    2.14
  -2  13  -6    0.82    1.68
   2 -12   8    2.30    2.09
   4   2  12   41.81   20.20
  -4 -10   5    1.90    1.36
   4   7   9   24.76   12.12
  -6   4   8    4.34    2.50
  -6   4   8   -1.09    1.63
  -7   4  -3    4.12    2.45
  -6   7   6    0.91    2.17
  -6   7   6    2.34    1.47
   5   6  -8    2.37    1.72
   3  -5  13    0.86    1.04
   1  12   7   -0.15    1.29
   1  12   7   -0.22    3.28
   7   2   0    0.76    1.48
  -7  -2   0    0.43    2.22
  -5   9   7   18.36    4.53
  -5   9   7    1.65    3.29
  -5  -9  -1    3.61    1.74
  -2  11   9    0.53    1.88
   1   9  11   24.72    7.81
  -4   8  10    4.92    5.27
   3   3  13    0.31    3.89
   3 -12   7    3.16    1.99
  -4  -3  12    4.35    3.92
   1 -10  11    1.69    1.84
  -1  -7  13   -0.49    1.49
  -1  -7  13    0.02    0.86
   0  14  -3    2.14    1.91
   7   2  -1    7.38    2.03
  -7  -2   1    9.29    4.14
  -5   1  11    2.82    3.38
   2  10   9    9.04    8.06
  -6   8  -5    3.36    1.72
  -6   9  -3    0.19    1.29
  -7   5   2    1.44    1.76
   6   4   6   22.45    2.99
  -7   5  -2    2.43    2.19
  -4  10   8    2.89    3.39
  -7  -1   3    4.05    3.06
  -6   6   7    5.22    2.47
  -5   7   9    5.13    3.60
  -5   7   9    0.80    2.60
  -6   6   7    1.27    2.09
   0 -10  11    0.28    1.55
   1  10  10    5.30    7.64
  -5  -9   2    0.78    1.49
   3  12  -3    0.59    0.97
   7   2   1    0.48    1.00
  -7  -2  -1   -0.19    1.91
   5   5  -9    1.28    1.44
   6   1   8   24.07    3.60
  -4  12  -5    1.52    1.60
  -5   0  11    2.49    3.22
   4   6  10   27.62   14.11
  -1  12   8    0.13    1.20
  -5   2  11    0.35    2.92
   2  13  -3    2.26    1.90
  -2  -6  13    3.89    3.09
  -3  -6  12    2.88    2.94
  -2   8  12   -0.03    0.77
  -3  -4  13    3.24    3.26
   5   7  -7    0.95    1.40
   1 -11  10    3.16    2.22
   6   3   7    3.23    1.66
   7   1   3    6.91    2.08
   2   7  12   11.48    6.60
   0  -9  12    2.11    2.05
   2 -14   3    9.87    2.13
  -2  14  -3    0.41    2.42
  -5  11  -4    2.51    1.87
   3   8  10   18.60   10.47
  -7  -2   2    6.06    3.70
   4  -5  12    0.04    0.66
   0  13   6    2.43    4.07
   1  13   5    2.96    4.18
   3 -13   5   -2.60    1.05
  -3  13  -5    2.08    0.94
  -4 -11   0   17.42    3.13
   2  -7  13    2.09    1.10
  -1  14  -4    1.24    1.53
   5  -1  11    2.28    1.39
   5  -1  11    5.39    5.86
   5  -2  11    6.73    4.64
   0 -11  10   -0.79    1.61
   5  -2  11    5.33    1.75
  -4 -11   1    2.53    1.48
   0  12   8    3.47    2.94
   0  12   8   -0.01    1.41
   7   2   2    1.63    1.28
   4 -13   0    0.11    1.11
   3   9   9    1.13    4.13
   6   6  -4    0.15    0.98
  -7   6   0    1.32    1.86
   1 -13   7   -0.09    1.07
  -5   3  11    1.84    2.76
  -2  -4  14    4.02    2.59
   4 -13   1    1.90    1.74
   0  -6  14    4.26    1.48
  -5  -9   3    7.64    2.38
   3   7  11   15.44   10.53
  -5  10   6    0.19    0.80
  -7   5  -3    7.29    2.42
   5   0  11    8.68    9.51
   5  -3  11    0.71    1.27
   5 -11  -4    2.39    1.98
   4  10   5   -0.14    0.90
  -7   6  -1    2.57    2.96
  -4 -11   2    1.57    1.32
   1  11   9    1.16    4.85
   1  11   9    0.64    1.52
   4 -13  -1    2.70    1.78
  -4   7  11   82.63   12.19
  -6   5   8    3.60    2.88
   0  14  -4    9.19    2.21
   3  11   6    0.14    1.82
   2  -5  14    1.10    0.97
   1  -6  14    0.95    0.95
   3  12  -4    5.48    2.08
   4   3  12   26.50   18.84
  -5   6  10    5.06    4.49
  -5   6  10   30.43    5.20
   4   5  11   37.09   13.52
   2  11   8   50.02    8.93
   2  11   8   20.25    3.81
  -4  -7  10   16.53    3.49

_computing_structure_solution     'SHELXT 2014/4 (Sheldrick, 2014)'
;
_shelx_hkl_checksum               47149
_shelx_SHELXL_version_number      '2014/7'
_olex2_submission_special_instructions 'No special instructions were received'
